# Supplementary material for: Extensive sampling of Saccharomyces cerevisiae in Taiwan reveals ecology and evolution of predomesticated lineages
Source: HighWire-hosted journal article supplement (doi:10.1101/gr.276286.121), 2022-03-31
Supplement: Supplemental_Tables_.xlsx [file Supplemental_Tables_.xlsx]

## Sheet: S1
Supplemental Table S1. Descriptions of samples and yeast isolates collected in this study
[1] Enrichment media key:
HS:(High-sugar)Hyma KE, Fay JC. 2013. Mixing of vineyard and oak-tree ecotypes of Saccharomyces cerevisiae in North American vineyards. Mol Ecol 22: 2917-2930.
LS:(Low-sugar):Hyma KE, Fay JC. 2013. Mixing of vineyard and oak-tree ecotypes of Saccharomyces cerevisiae in North American vineyards. Mol Ecol 22: 2917-2930.
S:Sniegowski PD, Dombrowski PG, Fingerman E. 2002. Saccharomyces cerevisiae and Saccharomyces paradoxus coexist in a natural woodland site in North America and display different levels of reproductive isolation from European conspecifics. FEMS Yeast Res 1: 299-306.
P:S with 2% agar
W:Wang QM, Liu WQ, Liti G, Wang SA, Bai FY. 2012. Surprisingly diverged populations of Saccharomyces cerevisiae in natural environments remote from human activity. Mol Ecol 21: 5404-5417.
Source ID	GPS ID	Location ID	Latitude	Longitude	Altitude	Altitude source	Host type	Host order	Host family	Host genus	Substrate sampled	Substrate sampled number	Media sampled[1]	Media sampled (n)	Isolated multiple times	Amplicon data available	Yeast isolated	Yeast isolate number	Yeast isolate ID	Substrate with yeast isolate	Substrate with yeast isolate number	Medium with yeast isolate	Medium with yeast isolate number
SP00080	KFC305	LID0523	24.1007	121.181	2170	GPS	animal				whole	1	HS	1	no	no	no	0
SP00128	KFC701	LID0096	22.3222	120.878	303.2	GPS	animal	Coleoptera	Curculionidae	Paratrachelophorus	whole	1	S	1	no	no	no	0
SP00168	PTT2202	LID0102	22.6505	120.638	319.3	GPS	animal	Hymenoptera			whole	1	HS	1	no	no	no	0
SP00172	PTT2204	LID0102	22.6497	120.638	335.7	GPS	animal	Lepidoptera			whole	1	HS	1	no	no	no	0
SP00174	PTT2205	LID0102	22.6497	120.639	365.1	GPS	animal	Hymenoptera	Formicidae		whole	1	HS,S	2	no	no	no	0
SP00179	PTT2206	LID0102	22.6493	120.639	377.4	GPS	animal	Orthoptera			whole	1	HS	1	no	no	no	0
SP00184	PTT2208	LID0102	22.6511	120.636	201.9	GPS	animal	Hemiptera			whole	1	HS,S	2	no	no	no	0
SP00204	PTT2305	LID0103	22.4136	120.733	1147.4	GPS	animal				whole	1	HS,S	2	no	no	no	0
SP00239	PTT2604	LID0457	22.7363	120.739	1013.7	GPS	animal	Hymenoptera	Apidae		whole	1	HS	1	no	no	no	0
SPA0007	AS004	LID0390	25.0423	121.613	35.75	GPS	animal				whole	1	HS	1	no	no	no	0
SPA0009	AS004	LID0390	25.0423	121.613	35.75	GPS	animal	Orthoptera			whole	1	HS	1	no	no	no	0
SPA0018	AS004	LID0390	25.0423	121.613	35.75	GPS	animal	Coleoptera			whole	1	HS	1	no	no	no	0
SPA0019	AS004	LID0390	25.0423	121.613	35.75	GPS	animal				whole	1	HS	1	no	no	no	0
SPA0020	AS004	LID0390	25.0423	121.613	35.75	GPS	animal	Hemiptera			whole	1	HS	1	no	no	no	0
SPA0021	AS002	LID0390	25.0421	121.613	66.014	GPS	animal	Lepidoptera			whole	1	HS	1	no	no	no	0
SPA0022	AS002	LID0390	25.0421	121.613	66.014	GPS	animal	Hemiptera			whole	1	HS	1	no	no	no	0
SPA0029	AS005	LID0105	25.0453	121.613	90.137	GPS	animal				whole	1	HS	1	no	no	no	0
SPA0031	AS005	LID0105	25.0453	121.613	90.137	GPS	animal	Lepidoptera	Lycaenidae		whole	1	HS	1	no	no	no	0
SPA0034	AS007	LID0453	25.0399	121.61	45.365	GPS	animal	Hemiptera			whole	1	HS	1	no	no	no	0
SPA0038	AS008	LID0453	25.0401	121.61	67.743	GPS	animal	Blattodea	Blattidae	Blatta	whole	1	HS	1	no	no	no	0
SPA0040	AS006	LID0453	25.0397	121.61	26.852	GPS	animal				whole	1	HS	1	no	no	no	0
SPA0067	NG002	LID0107	25.033	121.609	55.467	GPS	animal	Hemiptera			whole	1	HS	1	no	no	no	0
SPA0068	NG002	LID0107	25.033	121.609	55.467	GPS	animal	Hemiptera			whole	1	HS	1	no	no	no	0
SPA0069	NG003	LID0107	25.033	121.609	63.4	GPS	animal	Hemiptera			whole	1	HS	1	no	no	no	0
SPA0070	NG009	LID0107	25.0329	121.604	135.237	GPS	animal	Coleoptera	Curculionidae		whole	1	HS	1	no	no	no	0
SPA0111	FS016	LID0104	24.7564	121.595	634	dem_20m_calculate	animal	Dermoptera			whole	1	HS	1	no	no	no	0
SPA0112	FS023	LID0104	24.7564	121.595	634	dem_20m_calculate	animal	Lepidoptera			whole	1	HS	1	no	no	no	0
SPA0113	FS027	LID0104	24.7564	121.595	634	dem_20m_calculate	animal	Phasmatodea	Phasmidae		whole	1	HS	1	no	no	no	0
SPA0114	FS032	LID0104	24.7564	121.595	634	dem_20m_calculate	animal	Lepidoptera			whole	1	HS	1	no	no	no	0
SPA0115	FS033	LID0104	24.7564	121.595	634	dem_20m_calculate	animal	Hemiptera			whole	1	HS	1	no	no	no	0
SPA0165		LID0106	25.0484	121.669	395	google_map_approximate	animal				whole	1	HS	1	no	no	no	0
SPA0166		LID0106	25.0484	121.669	395	google_map_approximate	animal				whole	1	HS	1	no	no	no	0
SPA0167		LID0106	25.0484	121.669	395	google_map_approximate	animal				whole	1	HS	1	no	no	no	0
SPA0168		LID0106	25.0484	121.669	395	google_map_approximate	animal				whole	1	HS	1	no	no	no	0
SPA0169		LID0106	25.0484	121.669	395	google_map_approximate	animal				whole	1	HS	1	no	no	no	0
SPA0170		LID0106	25.0484	121.669	395	google_map_approximate	animal				whole	1	HS	1	no	no	no	0
SPA0171		LID0106	25.0484	121.669	395	google_map_approximate	animal				whole	1	HS	1	no	no	no	0
SPA0192	SD007	LID0117	24.9996	121.685	333.344	GPS	animal	Hymenoptera	Apidae		whole	1	HS	1	no	no	no	0
SPA0211		LID0541	25.0108	121.675	104	dem_20m_raw	animal				whole	1	HS	1	no	no	no	0
SPA0212		LID0541	25.0108	121.675	104	dem_20m_raw	animal				whole	1	HS	1	no	no	no	0
SPA0213		LID0541	25.0108	121.675	104	dem_20m_raw	animal				whole	1	HS	1	no	no	no	0
SPA0214		LID0541	25.0108	121.675	104	dem_20m_raw	animal				whole	1	HS	1	no	no	no	0
SPA0215		LID0541	25.0108	121.675	104	dem_20m_raw	animal				whole	1	HS	1	no	no	no	0
SP00231			22.7712	120.702			fermentation				sediment	1	HS	1	no	no	no	0
SP00375							fermentation				millet_wine_prep(raw_dough)	1	S	1	no	no	yes	1	RG09	millet_wine_prep(raw_dough)	1	S	1
SP00376							fermentation				millet_wine_prep(dough_wrapped)	1	W	1	no	no	yes	1	RG10	millet_wine_prep(dough_wrapped)	1	W	1
SP00377							fermentation				millet_wine_sediment	1		0	no	no	yes	1	RG12	millet_wine_sediment	1		0
SP00378							fermentation				shiokoji_Triticum_aestivum	1	HS	1	no	no	yes	1	SR24	shiokoji_Triticum_aestivum	1	HS	1
SP00379							fermentation				shiokoji_Oriza_sativa	1	HS	1	no	no	yes	1	SR25	shiokoji_Oriza_sativa	1	HS	1
SP00019		LID0518	20.7013	116.728	0	google_map_approximate	fungus				fruiting_body	1	HS	1	no	no	no	0
SP00025	TP002	LID0112	24.5059	121.63	1781	GPS	fungus				fruiting_body	1	HS,S	2	no	no	no	0
SP00029	TP006	LID0112	24.5073	121.628	1802.9	GPS	fungus				fruiting_body	1	S	1	no	no	no	0
SP00031	TP008	LID0112	24.5051	121.62	1892.1	GPS	fungus				fruiting_body	1	HS	1	no	no	no	0
SP00032	TP009	LID0112	24.5031	121.62	1841	dem_20m_raw	fungus				fruiting_body	1	S	1	no	no	no	0
SP00033		LID0112	24.5031	121.62	1841	dem_20m_raw	fungus				fruiting_body	1	HS	1	no	no	no	0
SP00037	KFC105	LID0412	24.4962	121.532	2036.1	GPS	fungus				fruiting_body	1	HS,S	2	no	no	no	0
SP00108	KFC601	LID0094	22.7971	121.036	776.9	GPS	fungus				fruiting_body	1	HS,S	2	no	no	no	0
SP00109	KFC601	LID0094	22.7971	121.036	776.9	GPS	fungus				fruiting_body	1	HS,S	2	no	no	no	0
SP00175	PTT2205	LID0102	22.6497	120.639	365.1	GPS	fungus				fruiting_body	1	HS,S	2	no	no	no	0
SP00176	PTT2205	LID0102	22.6497	120.639	365.1	GPS	fungus				stem	1	HS,S	2	no	no	no	0
SP00180	PTT2207	LID0102	22.6469	120.64	449.7	GPS	fungus				fruiting_body	1	HS,S	2	no	no	no	0
SP00181	PTT2207	LID0102	22.6469	120.64	449.7	GPS	fungus				fruiting_body	1	HS,S	2	no	no	no	0
SP00182	PTT2207	LID0102	22.6469	120.64	449.7	GPS	fungus				fruiting_body	1	HS,S	2	no	no	no	0
SP00370							industrial				commercial_lao_chao	1		0	no	no	yes	1	RG01	commercial_lao_chao	1		0
SP00371							industrial				commercial_lao_chao	1		0	no	no	yes	1	RG02	commercial_lao_chao	1		0
SP00372							industrial				pineapple_juice	1		0	no	no	yes	1	RG03	pineapple_juice	1		0
SP00373							industrial				pineapple_juice	1		0	no	no	yes	1	RG04	pineapple_juice	1		0
SP00374							industrial				fermenting_molasses	1		0	no	no	yes	1	RG05	fermenting_molasses	1		0
SP00015		LID0101	20.7013	116.728	0	google_map_approximate	other				water_sediment	1	HS	1	no	no	no	0
SP00055	KFC209	LID0428	24.1207	121.241	2781	GPS	other				whole	1	HS,S	2	no	no	no	0
SP00083	KFC306	LID0523	24.1003	121.181	2167.8	GPS	other				whole	1	HS	1	no	no	no	0
SP00105	KFC601	LID0094	22.7971	121.036	776.9	GPS	other				whole	1	HS,S	2	no	no	no	0
SP00253	FS001	LID0104	24.7607	121.582	683.9	GPS	other				feces	1	HS,S	2	no	no	no	0
SPA0248		LID0538	24.9611	121.737	396	dem_20m_calculate	other				whole	1	HS	1	no	no	no	0
SP00001	41-60_0416	LID0090	25.017	121.537	0	google_map_approximate	plant	Fagales	Fagaceae	Quercus	bark,soil,litter	3	HS,S,W,LS	5	no	no	yes	3	PD23A,PD01B,PD15A	soil,bark	2	W,S,L	3
SP00002	M 1-20_0629	LID0090	25.0177	121.538	0	google_map_approximate	plant	Fagales	Fagaceae	Quercus	bark,soil,litter	3	HS,S,W,LS	5	no	no	yes	6	PD11A,PD07A,PD17A,PD02A,PD16A,PD22A	soil,litter	2	W,H,S,L	4
SP00003	E 1-20_0224	LID0090	25.018	121.542	0	google_map_approximate	plant	Fagales	Fagaceae	Quercus	twig,soil,litter	3	HS,S,W,LS	5	no	no	yes	2	PD18A,PD14A	twig,litter	2	W,S	2
SP00004	E 51-60_0004	LID0090	25.0207	121.543	0	google_map_approximate	plant	Fagales	Fagaceae	Quercus	twig,soil,litter	3	HS,S,W,LS	5	no	no	yes	2	PD19A,PD21B	twig,litter	2	S,L	2
SP00005	E 0-0_0280	LID0090	25.0202	121.544	0	google_map_approximate	plant	Fagales	Fagaceae	Quercus	twig,soil,litter	3	HS,S,W,LS	5	no	no	yes	10	PD20A,PD08A,PD05B,PD10A,PD12A,PD03A,PD04A,PD13B,PD06A,PD09A	soil,twig,litter	3	W,H,S,L	4
SP00006	S 41-60_1188	LID0383	25.0145	121.54	0	google_map_approximate	plant	Fagales	Fagaceae	Quercus	bark,soil,litter	3	HS,S,W,LS	5	no	no	no	0
SP00007	S 41-60_0164	LID0383	25.0135	121.54	0	google_map_approximate	plant	Fagales	Fagaceae	Quercus	leaf,root,soil,litter	4	HS,S,W,LS	5	no	no	no	0
SP00008	W 1-10_0022	LID0383	25.015	121.53	0	google_map_approximate	plant	Fagales	Fagaceae	Quercus	leaf,twig,soil,litter	4	HS,S,W,LS	5	no	no	no	0
SP00009	W 1-10_0020	LID0383	25.015	121.53	0	google_map_approximate	plant	Fagales	Fagaceae	Quercus	bark,soil,litter	3	HS,S,W,LS	5	no	no	no	0
SP00010	W 1-10_0006	LID0383	25.0147	121.531	0	google_map_approximate	plant	Fagales	Fagaceae	Quercus	soil,litter	2	HS,S,W,LS	5	no	no	no	0
SP00011	ASF001	LID0390	25.0422	121.613	0	google_map_approximate	plant	Fagales	Fagaceae	Quercus	leaf,soil,litter,coir	4	HS,S,W,LS	5	no	no	no	0
SP00012	ASF002	LID0390	25.0422	121.613	0	google_map_approximate	plant	Fagales	Fagaceae	Quercus	leaf,soil,litter	3	HS,S,W,LS	5	no	no	no	0
SP00013		LID0517	20.7013	116.728	0	google_map_approximate	plant	Myrtale	Combretaceae	Terminalia	leaf,flower	2	HS	1	no	no	no	0
SP00014		LID0517	20.7013	116.728	0	google_map_approximate	plant	Boraginales	Boraginaceae	Heliotropium	leaf,twig,flower	3	HS	1	no	no	no	0
SP00016		LID0101	20.7013	116.728	0	google_map_approximate	plant	Pinales	Pinaceae	Pinus	fallen_fruit	1	HS	1	no	no	yes	1	PD41A	fallen_fruit	1	H	1
SP00017		LID0101	20.7013	116.728	0	google_map_approximate	plant	Solanales	Convolvulaceae	Ipomoea	litter_in_water	1	HS	1	no	no	no	0
SP00018		LID0518	20.7013	116.728	0	google_map_approximate	plant	Pandanales	Pandanaceae	Pandanus	twig,litter	2	HS	1	no	no	no	0
SP00020		LID0101	20.7013	116.728	0	google_map_approximate	plant	Solanales	Convolvulaceae	Ipomoea	leaf,litter,litter_in_water	3	HS	1	no	no	no	0
SP00021		LID0517	20.7013	116.728	0	google_map_approximate	plant	Boraginales	Boraginaceae	Heliotropium	leaf,flower	2	HS	1	no	no	no	0
SP00022	TP000	LID0112	24.5055	121.631	1765	GPS	plant	Fagales	Fagaceae	Fagus	litter	1	HS,S	2	no	no	no	0
SP00023	TP001	LID0112	24.5058	121.631	1779.4	GPS	plant	Fagales	Fagaceae	Fagus	leaf,litter	2	HS,S	2	no	no	no	0
SP00024	TP002	LID0112	24.5059	121.63	1781	GPS	plant	Fagales	Fagaceae	Fagus	leaf	1	HS,S	2	no	no	no	0
SP00026	TP003	LID0112	24.5065	121.63	1789.6	GPS	plant	Fagales	Fagaceae	Fagus	leaf,twig,flower,soil,litter	5	HS,S	2	no	no	yes	1	SR23	litter	1	H	1
SP00027	TP004	LID0112	24.507	121.629	1783.6	GPS	plant	Fagales	Fagaceae	Fagus	litter,gall	2	HS,S	2	no	no	no	0
SP00028	TP005	LID0112	24.5071	121.628	1789.1	GPS	plant	Fagales	Fagaceae	Fagus	leaf	1	HS,S	2	no	no	no	0
SP00030	TP007	LID0112	24.5078	121.626	1799.7	GPS	plant	Oxalidales	Oxalidaceae	Oxalis	leaf	1	HS	1	no	no	no	0
SP00034	KFC101	LID0412	24.4943	121.535	1945.9	GPS	plant	Pinales	Cupressaceae	Chamaecyparis	leaf	1	HS,S	2	no	no	no	0
SP00035	KFC102	LID0412	24.4947	121.535	1948.5	GPS	plant	Trochodendrales	Trochodendraceae	Trochodendron	leaf	1	HS,S	2	no	no	no	0
SP00036	KFC103	LID0412	24.4952	121.535	1963.8	GPS	plant	Ericales	Ericaceae	Rhododendron	bark	1	HS,S	2	no	no	no	0
SP00038		LID0412	24.4962	121.532	2036.1	GPS	plant	Poales	Poaceae	Isachne	leaf	1	HS,S	2	no	no	no	0
SP00039		LID0519	24.0217	121.132	1082.5	dem_20m_calculate	plant				leaf	1	HS,S	2	no	no	no	0
SP00040		LID0520	24.1057	121.198	2280	google_map_approximate	plant	Laurales	Lauraceae	Machilus	leaf,twig	2	HS,S	2	no	no	no	0
SP00041	KFC201	LID0415	24.4081	121.359	1497.6	GPS	plant	Ericales	Ebenaceae	Diospyros	leaf,twig	2	HS,S	2	no	no	no	0
SP00042	KFC201	LID0415	24.4081	121.359	1497.6	GPS	plant	Fagales	Fagaceae	Quercus	leaf	1	HS,S	2	no	no	no	0
SP00043	KFC201	LID0415	24.4081	121.359	1497.6	GPS	plant	Laurales	Lauraceae	Machilus	leaf	1	HS,S	2	no	no	no	0
SP00044	KFC201	LID0415	24.4081	121.359	1497.6	GPS	plant	Fagales	Fagaceae	Lithocarpus	leaf	1	HS,S	2	no	no	no	0
SP00045	KFC201	LID0415	24.4081	121.359	1497.6	GPS	plant	Lamiales	Lamiaceae	Callicarpa	flower	1	HS,S	2	no	no	no	0
SP00046	KFC202	LID0091	24.4037	121.361	1559.2	GPS	plant	Fagales	Fagaceae	Quercus	leaf	1	HS,S	2	no	no	yes	1	PD24A	leaf	1	H	1
SP00047	KFC202	LID0091	24.4037	121.361	1559.2	GPS	plant	Rosales	Rosaceae	Eriobotrya	leaf	1	HS,S	2	no	no	no	0
SP00048	KFC202	LID0091	24.4037	121.361	1559.2	GPS	plant	Fagales	Fagaceae	Quercus	leaf	1	HS,S	2	no	no	no	0
SP00049	KFC206	LID0091	24.2377	121.253	1958.1	GPS	plant	Cucurbitales	Cucurbitaceae	Thladiantha	fruit	1	HS,S	2	no	no	no	0
SP00050	KFC207	LID0521	24.1399	121.287	3093	GPS	plant	Caryophyllales	Polygonaceae	Reynoutria	dead_branch	1	HS,S	2	no	no	no	0
SP00051	KFC207	LID0521	24.1399	121.287	3093	GPS	plant	Pinales	Pinaceae	Pinus	leaf	1	HS,S	2	no	no	no	0
SP00052	KFC208	LID0521	24.1403	121.286	3118.6	GPS	plant	Poales	Poaceae	Yushania	leaf	1	HS,S	2	no	no	no	0
SP00053	KFC208	LID0521	24.1403	121.286	3118.6	GPS	plant	Pinales	Cupressaceae	Juniperus	leaf	1	HS,S	2	no	no	no	0
SP00054	KFC208	LID0521	24.1403	121.286	3118.6	GPS	plant	Ericales	Ericaceae	Rhododendron	leaf	1	HS,S	2	no	no	no	0
SP00056	KFC209	LID0428	24.1207	121.241	2781	GPS	plant	Rosales	Rosaceae	Photinia	fruit	1	HS,S	2	no	no	no	0
SP00057	KFC210	LID0428	24.1143	121.222	2648	GPS	plant	Asterales	Asteraceae	Aster	flower	1	HS,S	2	no	no	no	0
SP00058	KFC210	LID0428	24.1143	121.222	2648	GPS	plant				flower	1	HS,S	2	no	no	no	0
SP00059	KFC210	LID0428	24.1143	121.222	2648	GPS	plant				leaf	1	HS,S	2	no	no	no	0
SP00060	KFC211	LID0428	24.1116	121.214	2538.2	GPS	plant	Caryophyllales	Polygonaceae	Reynoutria	flower	1	HS,S	2	no	no	no	0
SP00061	KFC211	LID0428	24.1116	121.214	2538.2	GPS	plant	Caryophyllales	Polygonaceae	Reynoutria	leaf	1	HS,S	2	no	no	no	0
SP00062	KFC211	LID0428	24.1116	121.214	2538.2	GPS	plant	Brassicales	Caprifoliaceae	Lonicera	fruit	1	HS,S	2	no	no	no	0
SP00063	KFC301	LID0428	24.1047	121.196	2263.9	GPS	plant				soil	1	S	1	no	no	no	0
SP00064	KFC301	LID0428	24.1047	121.196	2263.9	GPS	plant	Apiales	Araliaceae	Fatsia	leaf	1	HS,S	2	no	no	no	0
SP00065	KFC301	LID0428	24.1047	121.196	2263.9	GPS	plant	Caryophyllales	Polygonaceae	Persicaria	leaf	1	HS,S	2	no	no	no	0
SP00066	KFC301	LID0428	24.1047	121.196	2263.9	GPS	plant	Fagales	Fagaceae	Quercus	fruit	1	HS,S	2	no	no	no	0
SP00067	KFC302	LID0428	24.1071	121.199	2300.2	GPS	plant				leaf	1	HS,S	2	no	no	no	0
SP00068	KFC302	LID0428	24.1071	121.199	2300.2	GPS	plant	Fagales	Fagaceae	Quercus	fallen_fruit	1	HS,S	2	no	no	no	0
SP00069	KFC302	LID0428	24.1071	121.199	2300.2	GPS	plant	Fagales	Fagaceae	Castanopsis	leaf	1	HS,S	2	no	no	no	0
SP00070	KFC303	LID0522	24.1109	121.213	2520.1	GPS	plant	Ericales	Ericaceae	Rhododendron	leaf	1	HS,S	2	no	no	no	0
SP00071	KFC303	LID0522	24.1109	121.213	2520.1	GPS	plant	Ranunculales	Berberidaceae	Berberis	leaf	1	HS,S	2	no	no	no	0
SP00072	KFC303	LID0522	24.1109	121.213	2520.1	GPS	plant	Fagales	Betulaceae	Alnus	leaf	1	HS,S	2	no	no	no	0
SP00073	KFC303	LID0522	24.1109	121.213	2520.1	GPS	plant	Fagales	Betulaceae	Alnus	twig,flower,fruit	3	HS,S	2	no	no	no	0
SP00074	KFC303	LID0522	24.1109	121.213	2520.1	GPS	plant	Fabales	Fabaceae	Trifolium	flower	1	HS,S	2	no	no	no	0
SP00075	KFC304	LID0522	24.1117	121.214	2538.1	GPS	plant	Fagales	Fagaceae	Quercus	leaf	1	HS,S	2	no	no	no	0
SP00076	KFC304	LID0522	24.1117	121.214	2538.1	GPS	plant	Fagales	Fagaceae	Quercus	leaf	1	HS,S	2	no	no	no	0
SP00077	KFC304	LID0522	24.1117	121.214	2538.1	GPS	plant	Fagales	Fagaceae	Quercus	leaf,bark,soil	3	HS,S	2	no	no	no	0
SP00078	KFC305	LID0523	24.1007	121.181	2170	GPS	plant	Rosales	Rosaceae	Prunus	leaf	1	HS,S	2	no	no	no	0
SP00079	KFC305	LID0523	24.1007	121.181	2170	GPS	plant	Proteales	Sabiaceae	Meliosma	leaf	1	HS,S	2	no	no	no	0
SP00081	KFC306	LID0523	24.1003	121.181	2167.8	GPS	plant	Ericales	Pentaphylacaceae	Eurya	leaf	1	HS,S	2	no	no	no	0
SP00082	KFC306	LID0523	24.1003	121.181	2167.8	GPS	plant	Proteales	Sabiaceae	Meliosma	leaf	1	HS,S	2	no	no	no	0
SP00084	KFC307	LID0523	24.0999	121.181	2165.2	GPS	plant	Rosales	Urticaceae	Oreocnide	leaf	1	HS,S	2	no	no	no	0
SP00085	KFC308	LID0523	24.0993	121.181	2163.7	GPS	plant	Fagales	Fagaceae	Quercus	leaf	1	HS,S	2	no	no	no	0
SP00086	KFC309	LID0523	24.0973	121.181	2169.6	GPS	plant	Fagales	Fagaceae		leaf,twig	2	HS,S	2	no	no	no	0
SP00087	KFC309	LID0523	24.0973	121.181	2169.6	GPS	plant	Lamiales	Lamiaceae	Callicarpa	leaf	1	HS,S	2	no	no	no	0
SP00088	KFC310	LID0092	24.0914	121.176	2049	GPS	plant	Rosales	Rosaceae	Eriobotrya	leaf	1	HS,S	2	no	no	no	0
SP00089	KFC311	LID0092	24.092	121.176	2038.6	GPS	plant	Ericales	Pentaphylacaceae	Eurya	leaf	1	HS,S	2	no	no	yes	1	PD25A	leaf	1	H	1
SP00090	KFC501	LID0524	23.8266	121.425	229.4	GPS	plant	Fabales	Fabaceae	Leucaena	leaf,twig,pod	3	HS,S	2	no	no	no	0
SP00091	KFC501	LID0524	23.8266	121.425	229.4	GPS	plant	Rosales	Moraceae	Ficus	fruit,gall	2	HS,S	2	no	no	no	0
SP00092	KFC501	LID0524	23.8266	121.425	229.4	GPS	plant	Laurales	Lauraceae	Machilus	leaf	1	HS,S	2	no	no	no	0
SP00093	KFC503	LID0093	23.1421	121.283	370.2	GPS	plant	Rosales	Ulmaceae	Zelkova	bark	1	HS,S	2	no	no	no	0
SP00094	KFC504	LID0093	23.1433	121.284	395	GPS	plant	Laurales	Lauraceae	Cinnamomum	leaf,bark	2	HS,S	2	no	no	no	0
SP00095	KFC504	LID0093	23.1433	121.284	395	GPS	plant	Myrtales	Myrtaceae	Psidium	leaf	1	HS,S	2	no	no	no	0
SP00096	KFC505	LID0093	23.1435	121.286	431.7	GPS	plant	Cucurbitales	Cucurbitaceae	Diplocyclos	fruit,fruit_green	2	HS,S	2	no	no	no	0
SP00097	KFC505	LID0093	23.1435	121.286	431.7	GPS	plant	Fabales	Fabaceae	Glycine	pod	1	HS,S	2	no	no	no	0
SP00098	KFC505	LID0093	23.1435	121.286	431.7	GPS	plant	Vitales	Vitaceae	Ampelopsis	fruit	1	HS,S	2	no	no	no	0
SP00099	KFC505	LID0093	23.1435	121.286	431.7	GPS	plant	Fabales	Fabaceae	Pueraria	gall	1	HS,S	2	no	no	no	0
SP00100	KFC506	LID0093	23.1439	121.287	449.5	GPS	plant				leaf	1	HS,S	2	no	no	no	0
SP00101	KFC507	LID0093	23.1428	121.283	389	GPS	plant	Rosales	Moraceae	Broussonetia	fruit	1	HS,S	2	no	no	yes	2	PD26A,PD27A	fruit	1	S,H	2
SP00102	KFC508	LID0093	23.1422	121.282	377.8	GPS	plant	Sapindales	Sapindaceae	Acer	leaf	1	HS,S	2	no	no	no	0
SP00103	KFC509	LID0093	23.1413	121.279	331.8	GPS	plant	Ericales	Primulaceae	Ardisia	fruit	1	HS,S	2	no	no	no	0
SP00104	KFC601	LID0094	22.7971	121.036	776.9	GPS	plant	Fagales	Fagaceae	Castanopsis	leaf,bark,litter,deadwood_bark	4	HS,S	2	no	no	yes	2	PD29A,PD28A	bark,deadwood_bark	2	S	1
SP00106	KFC601	LID0094	22.7971	121.036	776.9	GPS	plant				deadwood	1	HS,S	2	no	no	no	0
SP00107	KFC601	LID0094	22.7971	121.036	776.9	GPS	plant				deadwood	1	HS,S	2	no	no	no	0
SP00110	KFC602	LID0095	22.806	121.03	1000.5	GPS	plant	Poales	Poaceae	Carex	fruit	1	HS,S	2	no	no	no	0
SP00111	KFC602	LID0095	22.806	121.03	1000.5	GPS	plant	Rosales	Moraceae	Ficus	fruit	1	HS,S	2	no	no	no	0
SP00112	KFC602	LID0095	22.806	121.03	1000.5	GPS	plant	Gentianales	Rubiaceae	Lasianthus	fruit	1	HS,S	2	no	no	no	0
SP00113	KFC602	LID0095	22.806	121.03	1000.5	GPS	plant				fruit	1	HS,S	2	no	no	no	0
SP00114	KFC602	LID0095	22.806	121.03	1000.5	GPS	plant	Fagales	Fagaceae	Quercus	leaf	1	HS,S	2	no	no	no	0
SP00115	KFC602	LID0095	22.806	121.03	1000.5	GPS	plant	Cornales	Hydrangeaceae	Hydrangea	leaf	1	HS,S	2	no	no	no	0
SP00116	KFC602	LID0095	22.806	121.03	1000.5	GPS	plant	Fagales	Fagaceae	Castanopsis	leaf	1	HS,S	2	no	no	no	0
SP00117	KFC602	LID0095	22.806	121.03	1000.5	GPS	plant	Sapindales	Rutaceae	Zanthoxylum	fallen_fruit	1	HS,S	2	no	no	no	0
SP00118	KFC603	LID0095	22.8069	121.031	1010.5	GPS	plant	Solanales	Solanaceae	Solanum	fruit	1	HS,S	2	no	no	no	0
SP00119	KFC604	LID0095	22.8078	121.03	1023.6	GPS	plant	Fagales	Fagaceae	Castanopsis	leaf,twig	2	HS,S	2	no	no	yes	2	PD32A,PD30A	leaf	1	S,H	2
SP00120	KFC604	LID0095	22.8078	121.03	1023.6	GPS	plant	Rosales	Rosaceae	Rubus	fruit	1	HS,S	2	no	no	no	0
SP00121	KFC605	LID0095	22.809	121.029	1035.5	GPS	plant	Proteales	Proteaceae	Helicia	fruit	1	HS,S	2	no	no	no	0
SP00122	KFC606	LID0095	22.8099	121.028	1048.4	GPS	plant	Ericales	Pentaphylacaceae	Eurya	fallen_fruit	1	HS,S	2	no	no	no	0
SP00123	KFC607	LID0095	22.8106	121.027	1054	GPS	plant	Fagales	Fagaceae	Castanopsis	leaf	1	HS,S	2	no	no	no	0
SP00124	KFC607	LID0095	22.8106	121.027	1054	GPS	plant	Lamiales	Gesneriaceae	Hemiboea	flower	1	HS,S	2	no	no	no	0
SP00125	KFC701	LID0096	22.3222	120.878	303.2	GPS	plant	Malvales	Malvaceae	Hibiscus	flower	1	HS,S	2	no	no	no	0
SP00126	KFC701	LID0096	22.3222	120.878	303.2	GPS	plant	Brassicales	Caricaceae	Carica	flower	1	HS,S	2	no	no	no	0
SP00127	KFC701	LID0096	22.3222	120.878	303.2	GPS	plant	Laurales	Lauraceae	Cinnamomum	bark	1	HS,S	2	no	no	yes	1	PD31A	bark	1	H	1
SP00129	KFC701	LID0096	22.3222	120.878	303.2	GPS	plant	Lamiales	Verbenaceae	Stachytarpheta	bark	1	HS,S	2	no	no	no	0
SP00130	KFC702	LID0096	22.3224	120.879	312.2	GPS	plant	Asterales	Asteraceae	Tithonia	bark	1	HS,S	2	no	no	no	0
SP00131	KFC703	LID0097	22.3224	120.872	290.9	GPS	plant	Ericales	Styracaceae	Styrax	leaf,bark	2	HS,S	2	no	no	no	0
SP00132	KFC704	LID0097	22.3226	120.872	290.8	GPS	plant	Fagales	Fagaceae	Quercus	leaf,twig	2	HS,S	2	no	no	no	0
SP00133	KFC704	LID0097	22.3226	120.872	290.8	GPS	plant	Ericales	Styracaceae	Styrax	leaf,fruit	2	HS,S	2	no	no	no	0
SP00134	KFC705	LID0097	22.239	120.855	436.4	GPS	plant	Fagales	Fagaceae	Castanopsis	leaf	1	HS,S	2	no	no	yes	1	PD33A	leaf	1	S	1
SP00135	KFC705	LID0097	22.239	120.855	436.4	GPS	plant				leaf	1	HS,S	2	no	no	no	0
SP00136	KFC705	LID0097	22.239	120.855	436.4	GPS	plant	Fagales	Fagaceae	Quercus	leaf	1	HS,S	2	no	no	no	0
SP00137	KFC705	LID0097	22.239	120.855	436.4	GPS	plant	Fagales	Fagaceae		fallen_fruit	1	HS,S	2	no	no	no	0
SP00138	KFC706	LID0097	22.2378	120.854	415.4	GPS	plant	Fagales	Fagaceae	Castanopsis	leaf	1	HS,S	2	no	no	no	0
SP00139	KFC706	LID0097	22.2378	120.854	415.4	GPS	plant	Fagales	Fagaceae	Castanopsis	leaf,twig,fallen_fruit	3	HS,S	2	no	no	no	0
SP00140	KFC707	LID0097	22.2366	120.853	402.9	GPS	plant	Fabales	Fabaceae	Mimosa	flower	1	HS,S	2	no	no	no	0
SP00141	KFC708	LID0097	22.2407	120.854	439	GPS	plant	Fagales	Fagaceae	Quercus	bark	1	HS,S	2	no	no	yes	1	PD34A	bark	1	H	1
SP00142	KFC708	LID0097	22.2407	120.854	439	GPS	plant	Fagales	Fagaceae	Lithocarpus	fallen_fruit	1	HS,S	2	no	no	no	0
SP00143	KFC801	LID0526	23.4738	120.487	64.6	GPS	plant	Fagales	Fagaceae	Quercus	leaf,fruit,soil,litter,fallen_fruit	5	HS,S	2	no	no	no	0
SP00144	KFC802	LID0527	23.9712	120.971	462.5	GPS	plant	Rosales	Ulmaceae	Zelkova	bark	1	HS,S	2	no	no	no	0
SP00145	KFC802	LID0527	23.9712	120.971	462.5	GPS	plant	Fagales	Fagaceae	Castanea	leaf,twig,bark,fruit,soil,litter,fallen_fruit	7	HS,S	2	no	no	no	0
SP00146	KFC803	LID0098	23.9901	121.016	554.7	GPS	plant	Fagales	Fagaceae	Quercus	leaf,fallen_fruit	2	HS,S	2	no	no	no	0
SP00147	KFC803	LID0098	23.9901	121.016	554.7	GPS	plant	Fagales	Fagaceae	Castanopsis	leaf,twig,fruit,fallen_fruit	4	HS,S	2	no	no	yes	4	PD38A,PD36A,PD35A,PD37B	fruit,leaf,fallen_fruit	3	S,H	2
SP00148	KFC803	LID0098	23.9901	121.016	554.7	GPS	plant				fallen_fruit	1	HS,S	2	no	no	no	0
SP00149	KFC901	LID0099	23.9649	120.947	445	GPS	plant	Fagales	Fagaceae	Lithocarpus	leaf,fruit,litter,fallen_fruit	4	HS,S	2	no	no	yes	1	PD39A	litter	1	H	1
SP00150	KFC902	LID0100	23.9521	120.931	568.3	GPS	plant	Fagales	Fagaceae	Lithocarpus	litter	1	HS,S	2	no	no	no	0
SP00151	KFC902	LID0100	23.9521	120.931	568.3	GPS	plant	Fagales	Fagaceae	Lithocarpus	litter	1	HS,S	2	no	no	no	0
SP00152	KFC902	LID0100	23.9521	120.931	568.3	GPS	plant				litter	1	HS,S	2	no	no	no	0
SP00153	KFC903	LID0100	23.9512	120.924	587.7	GPS	plant	Fagales	Fagaceae	Quercus	leaf,twig,bark,soil,litter,fallen_fruit	6	HS,S	2	no	no	yes	1	PD40A	bark	1	S	1
SP00154	KFC903	LID0100	23.9512	120.924	587.7	GPS	plant	Fagales	Fagaceae	Lithocarpus	leaf,twig,soil	3	HS,S	2	no	no	no	0
SP00155	KFC903	LID0100	23.9512	120.924	587.7	GPS	plant	Gentianales	Rubiaceae	Psychotria	fruit	1	HS,S	2	no	no	no	0
SP00156	KFC904	LID0100	23.9542	120.927	589.4	GPS	plant	Fagales	Fagaceae	Castanopsis	fruit,soil,litter	3	HS,S	2	no	no	no	0
SP00157	KFC904	LID0100	23.9542	120.927	589.4	GPS	plant	Fagales	Fagaceae	Quercus	soil,fallen_fruit	2	HS,S	2	no	no	no	0
SP00158	KFC905	LID0455	23.9338	120.912	646.2	GPS	plant	Sapindales	Burseraceae	Canarium	leaf,twig,fruit	3	HS,S	2	no	no	no	0
SP00159	KFC905	LID0455	23.9338	120.912	646.2	GPS	plant	Malvales	Malvaceae	Pachira	twig,fruit,fallen_fruit	3	HS,S	2	no	no	no	0
SP00160	KFC906	LID0204	24.0142	121.009	1253.2	GPS	plant	Fagales	Fagaceae	Lithocarpus	leaf,twig,bark,soil,litter,fallen_fruit	6	HS,S	2	no	no	no	0
SP00161	KFC907	LID0204	23.9984	121.011	909.9	GPS	plant	Fagales	Fagaceae	Quercus	leaf,twig,fruit	3	HS,S	2	no	no	no	0
SP00162		LID0205	25.0822	121.624	30	google_map_approximate	plant				flower	1	HS,S	2	no	no	no	0
SP00163		LID0205	25.0873	121.623	30	google_map_approximate	plant	Rosales	Moraceae	Ficus	fruit	1	HS,S	2	no	no	no	0
SP00164		LID0205	25.0808	121.613	101.5	dem_20m_calculate	plant	Gentianales	Rubiaceae	Ixora	flower	1	HS,S	2	no	no	no	0
SP00165		LID0205	25.0797	121.615	92	dem_20m_calculate	plant	Fagales	Fagaceae	Quercus	leaf,litter,fallen_fruit	3	HS,S	2	no	no	no	0
SP00166	PTT2201	LID0102	22.6501	120.637	210.7	GPS	plant	Sapindales	Anacardiaceae	Mangifera	flower	1	HS,S	2	no	no	no	0
SP00167	PTT2202	LID0102	22.6505	120.638	298.4	GPS	plant	Solanales	Convolvulaceae	Ipomoea	flower	1	HS	1	no	no	no	0
SP00169	PTT2203	LID0102	22.6503	120.638	319.3	GPS	plant	Malpighiales	Euphorbiaceae	Vernicia	leaf,twig	2	HS,S	2	no	no	no	0
SP00170	PTT2204	LID0102	22.6497	120.638	335.7	GPS	plant	Gentianales	Rubiaceae	Wendlandia	bark,flower,soil	3	HS,S	2	no	no	no	0
SP00171	PTT2204	LID0102	22.6497	120.638	335.7	GPS	plant	Ericales	Primulaceae	Ardisia	leaf,fruit	2	HS,S	2	no	no	yes	1	RG06	fruit	1	H	1
SP00173	PTT2204	LID0102	22.6497	120.638	335.7	GPS	plant				leaf	1	HS,S	2	no	no	no	0
SP00177	PTT2206	LID0102	22.6493	120.639	377.4	GPS	plant	Malvales	Malvaceae	Pachira	litter,fallen_fruit	2	HS,S	2	no	no	no	0
SP00178	PTT2206	LID0102	22.6493	120.639	377.4	GPS	plant	Malvales	Malvaceae	Pachira	leaf	1	HS	1	no	no	no	0
SP00183	PTT2208	LID0102	22.6511	120.636	201.9	GPS	plant	Lamiales	Lamiaceae	Clerodendrum	flower	1	HS,S	2	no	no	no	0
SP00185	PTT2209	LID0207	22.6817	120.645	144.2	GPS	plant	Fagales	Fagaceae	Quercus	leaf,twig,bark,flower,root,soil,litter	7	HS,S	2	no	no	no	0
SP00186	PTT2210	LID0207	22.6763	120.647	203.1	GPS	plant	Rosales	Moraceae	Broussonetia	twig,flower	2	HS,S	2	no	no	no	0
SP00187	PTT2211	LID0207	22.6757	120.647	206.7	GPS	plant				litter_in_water	1	HS,S	2	no	no	no	0
SP00188	PTT2212	LID0207	22.6788	120.647	195.8	GPS	plant	Malpighiales	Euphorbiaceae	Vernicia	fallen_fruit	1	HS,S	2	no	no	no	0
SP00189	PTT2301	LID0103	22.4171	120.705	822.3	GPS	plant	Fagales	Fagaceae	Quercus	leaf,bark	2	HS,S	2	no	no	no	0
SP00190	PTT2301	LID0103	22.4171	120.705	822.3	GPS	plant	Fagales	Fagaceae	Quercus	leaf	1	HS,S	2	no	no	no	0
SP00191	PTT2301	LID0103	22.4171	120.705	822.3	GPS	plant	Fagales	Fagaceae	Quercus	leaf,bark	2	HS,S	2	no	no	yes	1	RG08	bark	1	H	1
SP00192	PTT2301	LID0103	22.4171	120.705	822.3	GPS	plant	Fagales	Fagaceae	Quercus	leaf	1	HS,S	2	no	no	no	0
SP00193	PTT2301	LID0103	22.4171	120.705	822.3	GPS	plant	Fagales	Fagaceae	Quercus	leaf	1	HS,S	2	no	no	no	0
SP00194	PTT2301	LID0103	22.4171	120.705	822.3	GPS	plant	Fagales	Fagaceae	Lithocarpus	leaf,bark	2	HS,S	2	no	no	no	0
SP00195	PTT2301	LID0103	22.4171	120.705	822.3	GPS	plant	Fagales	Fagaceae	Quercus	leaf,bark	2	HS,S	2	no	no	no	0
SP00196	PTT2301	LID0103	22.4171	120.705	822.3	GPS	plant	Fagales	Fagaceae	Quercus	leaf,bark	2	HS,S	2	no	no	no	0
SP00197	PTT2301	LID0103	22.4171	120.705	822.3	GPS	plant	Fagales	Fagaceae	Quercus	leaf,root	2	HS,S	2	no	no	no	0
SP00198	PTT2302	LID0103	22.4184	120.71	891	GPS	plant	Fagales	Fagaceae	Quercus	leaf	1	HS,S	2	no	no	no	0
SP00199	PTT2302	LID0103	22.4184	120.71	891	GPS	plant	Fagales	Fagaceae	Quercus	leaf	1	HS,S	2	no	no	no	0
SP00200	PTT2303	LID0103	22.4185	120.71	885.8	GPS	plant	Fagales	Fagaceae	Quercus	leaf	1	HS,S	2	no	no	no	0
SP00201	PTT2304	LID0103	22.4135	120.732	1140.6	GPS	plant	Laurales	Lauraceae	Machilus	leaf	1	HS,S	2	no	no	no	0
SP00202	PTT2304	LID0103	22.4135	120.732	1140.6	GPS	plant	Fagales	Fagaceae	Lithocarpus	leaf	1	HS,S	2	no	no	no	0
SP00203	PTT2305	LID0103	22.4136	120.733	1147.4	GPS	plant	Cornales	Hydrangeaceae	Deutzia	flower	1	HS,S	2	no	no	no	0
SP00205	PTT2306	LID0103	22.4116	120.748	1337.7	GPS	plant	Sapindales	Sapindaceae	Acer	flower	1	HS,S	2	no	no	no	0
SP00206	PTT2401	LID0456	22.7932	120.656	728.8	GPS	plant	Fagales	Fagaceae	Castanopsis	leaf,flower	2	HS,S	2	no	no	no	0
SP00207	PTT2401	LID0456	22.7932	120.656	728.8	GPS	plant	Fagales	Fagaceae	Lithocarpus	leaf	1	HS,S	2	no	no	no	0
SP00208	PTT2402	LID0456	22.7938	120.655	740.4	GPS	plant	Fagales	Fagaceae	Castanopsis	leaf	1	HS,S	2	no	no	no	0
SP00209	PTT2403	LID0456	22.8028	120.655	753.4	GPS	plant	Fagales	Fagaceae	Quercus	leaf,sprout	2	HS,S	2	no	no	no	0
SP00210	PTT2404	LID0456	22.803	120.655	749.9	GPS	plant	Fagales	Fagaceae	Quercus	leaf	1	HS,S	2	no	no	no	0
SP00211	PTT2405	LID0456	22.8097	120.661	758.8	GPS	plant	Fagales	Fagaceae	Castanopsis	leaf,bark	2	HS,S	2	no	no	no	0
SP00212	PTT2406	LID0456	22.8098	120.661	754.9	GPS	plant	Fagales	Fagaceae	Lithocarpus	leaf	1	HS,S	2	no	no	no	0
SP00213	PTT2407	LID0456	22.811	120.661	755.7	GPS	plant	Fagales	Fagaceae	Castanopsis	leaf,flower	2	HS,S	2	no	no	no	0
SP00214	PTT2408	LID0456	22.8133	120.661	754	GPS	plant	Fagales	Fagaceae	Castanopsis	leaf,bark	2	HS,S	2	no	no	no	0
SP00215	PTT2409	LID0456	22.8145	120.661	755.7	GPS	plant	Fagales	Fagaceae	Castanopsis	leaf	1	HS,S	2	no	no	no	0
SP00216	PTT2410	LID0456	22.818	120.665	820.3	GPS	plant	Fagales	Fagaceae	Castanopsis	leaf,bark	2	HS,S	2	no	no	no	0
SP00217	PTT2410	LID0456	22.818	120.665	820.3	GPS	plant	Fagales	Fagaceae	Quercus	leaf,litter,cupule	3	HS,S	2	no	no	no	0
SP00218	PTT2410	LID0456	22.818	120.665	820.3	GPS	plant	Laurales	Lauraceae	Litsea	leaf	1	HS,S	2	no	no	no	0
SP00219	PTT2410	LID0456	22.818	120.665	820.3	GPS	plant	Fagales	Fagaceae	Quercus	leaf,bark	2	HS,S	2	no	no	no	0
SP00220	PTT2411	LID0456	22.8168	120.677	923.4	GPS	plant	Fagales	Fagaceae	Quercus	leaf,bark,flower,soil	4	HS,S	2	no	no	no	0
SP00221	PTT2411	LID0456	22.8168	120.677	923.4	GPS	plant	Fagales	Fagaceae	Quercus	leaf,sprout	2	HS,S	2	no	no	no	0
SP00222	PTT2412	LID0456	22.8179	120.677	918.2	GPS	plant	Ericales	Styracaceae	Styrax	leaf	1	HS,S	2	no	no	no	0
SP00223	PTT2412	LID0456	22.8179	120.677	918.2	GPS	plant	Fagales	Fagaceae	Lithocarpus	leaf	1	HS,S	2	no	no	no	0
SP00224	PTT2412	LID0456	22.8179	120.677	918.2	GPS	plant	Fagales	Fagaceae	Lithocarpus	leaf,flower	2	HS,S	2	no	no	no	0
SP00225	PTT2413	LID0456	22.8182	120.677	914.9	GPS	plant	Fagales	Fagaceae	Castanopsis	leaf,flower	2	HS,S	2	no	no	no	0
SP00226	PTT2414	LID0456	22.8201	120.674	889.6	GPS	plant	Fagales	Fagaceae	Quercus	leaf,flower,sprout	3	HS,S	2	no	no	no	0
SP00227	PTT2415	LID0456	22.8193	120.669	845.7	GPS	plant	Fagales	Fagaceae	Castanopsis	leaf,flower,fruit	3	HS,S	2	no	no	no	0
SP00228	PTT2415	LID0456	22.8193	120.669	845.7	GPS	plant	Fagales	Fagaceae	Lithocarpus	leaf	1	HS,S	2	no	no	no	0
SP00229	PTT2416	LID0456	22.819	120.669	848.4	GPS	plant	Fagales	Fagaceae	Castanopsis	leaf,flower	2	HS,S	2	no	no	no	0
SP00230	PTT2417	LID0456	22.779	120.664	626.5	GPS	plant	Sapindales	Sapindaceae	Dimocarpus	leaf,flower	2	HS,S	2	no	no	no	0
SP00232	PTT2601	LID0457	22.739	120.732	930.1	GPS	plant	Fagales	Fagaceae	Castanopsis	leaf,flower	2	HS,S	2	no	no	no	0
SP00233	PTT2602	LID0457	22.7393	120.732	939.3	GPS	plant	Fagales	Fagaceae	Quercus	leaf	1	HS,S	2	no	no	no	0
SP00234	PTT2603	LID0457	22.7414	120.738	981.8	GPS	plant	Fagales	Fagaceae	Quercus	leaf	1	HS,S	2	no	no	no	0
SP00235	PTT2603	LID0457	22.7414	120.738	981.8	GPS	plant	Fagales	Fagaceae	Quercus	leaf	1	HS,S	2	no	no	no	0
SP00236	PTT2604	LID0457	22.7363	120.739	1013.7	GPS	plant	Fagales	Fagaceae	Quercus	leaf,bark,litter	3	HS,S	2	no	no	no	0
SP00237	PTT2604	LID0457	22.7363	120.739	1013.7	GPS	plant	Rosales	Rosaceae	Prunus	bark,fruit	2	HS,S	2	no	no	no	0
SP00238	PTT2604	LID0457	22.7363	120.739	1013.7	GPS	plant	Rosales	Rosaceae	Prunus	flower	1	HS,S	2	no	no	no	0
SP00240	PTT2605	LID0457	22.7372	120.74	1016.6	GPS	plant	Fagales	Fagaceae	Castanopsis	leaf,bark,flower	3	HS,S	2	no	no	no	0
SP00241	PTT2606	LID0457	22.7381	120.74	1028.4	GPS	plant	Fagales	Fagaceae	Quercus	leaf,bark,sprout	3	HS,S	2	no	no	no	0
SP00242	PTT2607	LID0457	22.7396	120.74	1028.3	GPS	plant	Fagales	Fagaceae	Quercus	leaf,bark,sprout	3	HS,S	2	no	no	no	0
SP00243	PTT2607	LID0457	22.7396	120.74	1028.3	GPS	plant				leaf,bark,cupule_and_sprout	3	HS,S	2	no	no	no	0
SP00244	PTT2607	LID0457	22.7396	120.74	1028.3	GPS	plant	Fagales	Fagaceae	Quercus	leaf,bark,flower,sprout	4	HS,S	2	no	no	no	0
SP00245	PTT2608	LID0457	22.7399	120.74	1031.7	GPS	plant	Fagales	Fagaceae	Quercus	leaf,bark,flower	3	HS,S	2	no	no	no	0
SP00246	PTT2609	LID0457	22.739	120.736	983.5	GPS	plant	Fagales	Fagaceae	Castanopsis	leaf,bark,flower,fruit	4	HS,S	2	no	no	no	0
SP00247		LID0534	25.0425	121.611	13	dem_20m_raw	plant	Fagales	Fagaceae	Castanopsis	leaf,bark,flower	3	HS,S	2	no	no	no	0
SP00248		LID0535	24.6933	121.221	379.9	GPS	plant	Fagales	Fagaceae	Quercus	leaf,bark	2	HS,S	2	no	no	no	0
SP00249		LID0535	24.6933	121.221	379.9	GPS	plant	Fagales	Fagaceae	Quercus	leaf,bark	2	HS,S	2	no	no	no	0
SP00250		LID0535	24.6935	121.221	377.1	GPS	plant	Fagales	Fagaceae	Quercus	leaf,bark	2	HS,S	2	no	no	no	0
SP00251		LID0535	24.6935	121.221	377.1	GPS	plant	Fagales	Fagaceae	Quercus	leaf,bark	2	HS,S	2	no	no	no	0
SP00252		LID0535	24.7016	121.226	747	GPS	plant	Fagales	Fagaceae	Quercus	leaf,bark	2	HS,S	2	no	no	no	0
SP00254	FS001	LID0104	24.7607	121.582	683.9	GPS	plant	Fagales	Fagaceae	Castanopsis	soil,litter	2	HS,S	2	no	no	no	0
SP00255	FS001	LID0104	24.7607	121.582	683.9	GPS	plant				litter	1	HS,S	2	no	no	no	0
SP00256	FS001	LID0104	24.7607	121.582	683.9	GPS	plant				deadwood	1	HS,S	2	no	no	no	0
SP00257	FS001	LID0104	24.7607	121.582	683.9	GPS	plant				deadwood	1	HS,S	2	no	no	no	0
SP00258	FS002	LID0104	24.7609	121.582	679	GPS	plant				deadwood	1	HS,S	2	no	no	no	0
SP00259	FS002	LID0104	24.7609	121.582	679	GPS	plant				deadwood	1	HS,S	2	no	no	no	0
SP00260	FS002	LID0104	24.7609	121.582	679	GPS	plant				deadwood	1	HS,S	2	no	no	no	0
SP00261	FS003	LID0104	24.7611	121.58	660.7	GPS	plant				litter	1	HS,S	2	no	no	no	0
SP00262	FS004	LID0104	24.7622	121.58	667.8	GPS	plant	Fagales	Fagaceae	Lithocarpus	soil,litter	2	HS,S	2	no	no	no	0
SP00263	FS005	LID0104	24.7625	121.581	668.5	GPS	plant	Fagales	Fagaceae	Lithocarpus	soil,litter	2	HS,S	2	no	no	no	0
SP00264	FS006	LID0104	24.7628	121.581	666.5	GPS	plant				deadwood	1	HS,S	2	no	no	no	0
SP00265	FS006	LID0104	24.7628	121.581	666.5	GPS	plant				fallen_fruit	1	HS,S	2	no	no	no	0
SP00266	FS007	LID0104	24.7626	121.581	668	GPS	plant	Fagales	Juglandaceae	Engelhardia	soil,litter	2	HS,S	2	no	no	no	0
SP00267	FS008	LID0104	24.762	121.582	656.9	GPS	plant	Oxalidales	Elaeocarpaceae	Sloanea	soil,litter,fallen_fruit	3	HS,S	2	no	no	no	0
SP00268	FS008	LID0104	24.762	121.582	656.9	GPS	plant	Fagales	Fagaceae	Lithocarpus	litter	1	HS,S	2	no	no	no	0
SP00269	FS009	LID0104	24.7616	121.583	654.9	GPS	plant				litter	1	HS,S	2	no	no	no	0
SP00270	FS010	LID0104	24.7621	121.583	655.6	GPS	plant	Fagales	Fagaceae	Lithocarpus	litter	1	HS,S	2	no	no	no	0
SP00271	FS011	LID0104	24.7626	121.584	659.2	GPS	plant	Laurales	Lauraceae	Neolitsea	litter	1	HS,S	2	no	no	no	0
SP00272	FS012	LID0104	24.7629	121.585	660.4	GPS	plant	Fabales	Fabaceae	Ormosia	litter	1	HS,S	2	no	no	no	0
SP00273	FS013	LID0104	24.7634	121.585	662	GPS	plant				deadwood	1	HS,S	2	no	no	no	0
SP00274	FS014	LID0104	24.7644	121.587	666.6	GPS	plant				litter	1	HS,S	2	no	no	no	0
SP00275	FS015	LID0104	24.7637	121.586	662.8	GPS	plant	Laurales	Lauraceae	Neolitsea	litter	1	HS,S	2	no	no	no	0
SP00276	FS016	LID0104	24.7629	121.586	657	GPS	plant	Fagales	Fagaceae	Lithocarpus	litter	1	HS,S	2	no	no	no	0
SP00277	FS016	LID0104	24.7629	121.586	657	GPS	plant	Fagales	Fagaceae	Quercus	litter	1	HS,S	2	no	no	yes	1	RG11	litter	1	H	1
SP00278	FS016	LID0104	24.7629	121.586	657	GPS	plant	Fagales	Fagaceae	Quercus	litter	1	HS,S	2	no	no	no	0
SP00279	FS016	LID0104	24.7629	121.586	657	GPS	plant	Laurales	Lauraceae	Beilschmiedia	litter	1	HS,S	2	no	no	no	0
SP00280	FS017	LID0104	24.7623	121.585	651.2	GPS	plant	Fagales	Fagaceae	Quercus	litter	1	HS,S	2	no	no	no	0
SP00281	FS017	LID0104	24.7623	121.585	651.2	GPS	plant	Fagales	Fagaceae	Quercus	litter	1	HS,S	2	no	no	no	0
SP00282	FS018	LID0104	24.7619	121.585	647.2	GPS	plant	Fagales	Fagaceae		litter	1	HS,S	2	no	no	no	0
SP00283	FS018	LID0104	24.7619	121.585	647.2	GPS	plant	Fagales	Fagaceae		litter,fallen_fruit	2	HS,S	2	no	no	no	0
SP00284		LID0104	24.7618	121.584	645.5	GPS	plant	Fagales	Fagaceae	Castanopsis	leaf,bark	2	HS,S	2	no	no	no	0
SP00285		LID0104	24.7622	121.585	642.09	GPS	plant	Fagales	Fagaceae	Castanopsis	leaf,bark	2	HS,S	2	no	no	no	0
SP00286		LID0104	24.7618	121.584	645.5	GPS	plant	Fagales	Fagaceae	Castanopsis	leaf,bark	2	HS,S	2	no	no	yes	1	SR22	leaf	1	S	1
SP00287		LID0104	24.7621	121.584	649.339	GPS	plant	Fagales	Fagaceae	Castanopsis	leaf,bark	2	HS,S	2	no	no	no	0
SP00288		LID0104	24.7619	121.584	648.798	GPS	plant	Fagales	Fagaceae	Castanopsis	leaf,bark	2	HS,S	2	no	no	no	0
SP00289		LID0104	24.7618	121.584	645.5	GPS	plant	Fagales	Fagaceae	Castanopsis	leaf,bark	2	HS,S	2	no	no	no	0
SP00290		LID0104	24.7617	121.584	643.74	GPS	plant	Fagales	Fagaceae	Castanopsis	leaf,bark	2	HS,S	2	no	no	no	0
SP00291		LID0104	24.7618	121.584	645.5	GPS	plant	Fagales	Fagaceae	Castanopsis	leaf,bark	2	HS,S	2	no	no	no	0
SP00292		LID0104	24.7621	121.584	649.712	GPS	plant	Fagales	Fagaceae	Castanopsis	leaf,bark	2	HS,S	2	no	no	no	0
SP00293		LID0104	24.7621	121.584	648.793	GPS	plant	Fagales	Fagaceae	Castanopsis	leaf,bark	2	HS,S	2	no	no	no	0
SP00294		LID0104	24.7621	121.584	648.793	GPS	plant	Fagales	Fagaceae	Castanopsis	bark	1	HS,S	2	no	no	no	0
SP00295		LID0104	24.762	121.585	645.87	GPS	plant	Fagales	Fagaceae	Fagus	leaf,bark	2	HS,S	2	no	no	no	0
SP00296		LID0104	24.7618	121.584	645.5	GPS	plant	Fagales	Fagaceae	Lithocarpus	leaf,bark	2	HS,S	2	no	no	no	0
SP00297		LID0104	24.7624	121.585	647.093	GPS	plant	Fagales	Fagaceae	Lithocarpus	leaf,bark,flower	3	HS,S	2	no	no	yes	1	SR17	flower	1	H	1
SP00298		LID0104	24.7623	121.585	648.562	GPS	plant	Fagales	Fagaceae	Lithocarpus	leaf,bark	2	HS,S	2	no	no	no	0
SP00299		LID0104	24.7622	121.585	646.343	GPS	plant	Fagales	Fagaceae	Lithocarpus	leaf,bark	2	HS,S	2	no	no	yes	1	SR12	leaf	1	H	1
SP00300		LID0104	24.7618	121.584	645.5	GPS	plant	Fagales	Fagaceae	Lithocarpus	leaf,bark	2	HS,S	2	no	no	no	0
SP00301		LID0104	24.7622	121.585	649.435	GPS	plant	Fagales	Fagaceae	Lithocarpus	leaf,bark	2	HS,S	2	no	no	no	0
SP00302		LID0104	24.7618	121.584	645.5	GPS	plant	Fagales	Fagaceae	Lithocarpus	leaf,bark	2	HS,S	2	no	no	no	0
SP00303		LID0104	24.7623	121.585	646.094	GPS	plant	Fagales	Fagaceae	Lithocarpus	leaf,bark	2	HS,S	2	no	no	no	0
SP00304		LID0104	24.7618	121.584	643.624	GPS	plant	Fagales	Fagaceae	Lithocarpus	leaf,bark	2	HS,S	2	no	no	no	0
SP00305		LID0104	24.7628	121.585	607.079	GPS	plant	Fagales	Fagaceae	Lithocarpus	leaf,bark	2	HS,S	2	no	no	no	0
SP00306		LID0104	24.7625	121.586	653.517	GPS	plant	Fagales	Fagaceae	Lithocarpus	leaf,bark	2	HS,S	2	no	no	no	0
SP00307		LID0104	24.7619	121.585	655.846	GPS	plant	Fagales	Fagaceae	Lithocarpus	leaf,bark	2	HS,S	2	no	no	no	0
SP00308		LID0104	24.7619	121.584	651.323	GPS	plant	Fagales	Fagaceae	Lithocarpus	leaf,bark,fallen_fruit	3	HS,S	2	no	no	no	0
SP00309		LID0104	24.762	121.585	653.77	GPS	plant	Fagales	Fagaceae	Lithocarpus	leaf,bark,fruit,fallen_fruit	4	HS,S	2	no	no	yes	1	SR13	leaf	1	H	1
SP00310		LID0104	24.7619	121.585	647.139	GPS	plant	Fagales	Fagaceae	Quercus	leaf,bark	2	HS,S	2	no	no	no	0
SP00311		LID0104	24.7619	121.585	646.87	GPS	plant	Fagales	Fagaceae	Quercus	leaf,bark	2	HS,S	2	no	no	no	0
SP00312		LID0104	24.7624	121.585	648.17	GPS	plant	Fagales	Fagaceae	Quercus	leaf,bark	2	HS,S	2	no	no	no	0
SP00313		LID0104	24.7623	121.585	637.996	GPS	plant	Fagales	Fagaceae	Quercus	leaf,bark	2	HS,S	2	no	no	no	0
SP00314		LID0104	24.7622	121.584	645.527	GPS	plant	Fagales	Fagaceae	Quercus	leaf,bark	2	HS,S	2	no	no	yes	2	SR09,SR18	leaf,bark	2	S,H	2
SP00315		LID0104	24.7621	121.584	651.429	GPS	plant	Fagales	Fagaceae	Quercus	leaf,bark	2	HS,S	2	no	no	no	0
SP00316		LID0104	24.7627	121.585	619.758	GPS	plant	Fagales	Fagaceae	Quercus	leaf,bark	2	HS,S	2	no	no	no	0
SP00317		LID0104	24.7618	121.584	645.5	GPS	plant	Fagales	Fagaceae	Quercus	leaf,bark	2	HS,S	2	no	no	no	0
SP00318		LID0104	24.7625	121.585	653.654	GPS	plant	Fagales	Fagaceae	Quercus	leaf,bark	2	HS,S	2	no	no	yes	2	SR14,SR20	bark,leaf	2	H	1
SP00319		LID0104	24.7622	121.585	647.098	GPS	plant	Fagales	Fagaceae	Quercus	leaf,bark	2	HS,S	2	no	no	yes	1	SR10	bark	1	H	1
SP00320		LID0104	24.7621	121.585	643.063	GPS	plant	Fagales	Fagaceae	Quercus	leaf,bark,fruit	3	HS,S	2	no	no	yes	1	SR21	bark	1	H	1
SP00321		LID0104	24.7622	121.584	648.566	GPS	plant	Fagales	Fagaceae	Quercus	leaf,bark	2	HS,S	2	no	no	no	0
SP00322		LID0104	24.7618	121.584	645.5	GPS	plant	Fagales	Fagaceae	Quercus	leaf,bark	2	HS,S	2	no	no	no	0
SP00323		LID0104	24.7621	121.585	650.803	GPS	plant	Fagales	Fagaceae	Quercus	leaf,bark	2	HS,S	2	no	no	no	0
SP00324		LID0104	24.7624	121.585	646.304	GPS	plant	Fagales	Fagaceae	Quercus	leaf,bark	2	HS,S	2	no	no	yes	2	SR15,SR11	leaf,bark	2	H	1
SP00325		LID0104	24.7627	121.586	647.7	GPS	plant	Fagales	Fagaceae	Quercus	leaf,bark	2	HS,S	2	no	no	no	0
SP00326		LID0104	24.7622	121.585	626.108	GPS	plant	Fagales	Fagaceae	Quercus	leaf,bark	2	HS,S	2	no	no	yes	1	SR19	leaf	1	S	1
SP00327		LID0104	24.7596	121.585	641.649	GPS	plant	Fagales	Fagaceae	Quercus	leaf,bark	2	HS,S	2	no	no	no	0
SP00328		LID0104	24.7626	121.586	653.052	GPS	plant	Fagales	Fagaceae	Lithocarpus	leaf,bark	2	HS,S	2	no	no	yes	1	SR16	leaf	1	H	1
SP00329	CAT01	LID0515	25.0809	121.844	400	google_map_approximate	plant	Malpighiales	Euphorbiaceae	Mallotus	leaf	1	HS,S	2	no	no	no	0
SP00330	CAT03	LID0515	25.0808	121.844	405	google_map_approximate	plant	Fagales	Fagaceae	Quercus	leaf	1	HS,S	2	no	no	no	0
SP00331	CAT03	LID0515	25.081	121.845	392	dem_20m_raw	plant	Myrtales	Melastomataceae	Melastoma	flower	1	HS,S	2	no	no	no	0
SP00332	CAT03	LID0515	25.0646	121.848	132	dem_20m_raw	plant	Fagales	Fagaceae	Quercus	leaf	1	HS,S	2	no	no	no	0
SP00333		LID0515	25.0611	121.85	143	dem_20m_raw	plant	Fagales	Fagaceae	Quercus	leaf	1	HS,S	2	no	no	no	0
SP00334		LID0515	25.0611	121.85	143	dem_20m_approximate	plant	Rosales	Moraceae	Ficus	fallen_fruit	1	HS,S	2	no	no	no	0
SP00335		LID0515	25.0886	121.838	203.5	dem_20m_calculate	plant	Malpighiales	Euphorbiaceae	Vernicia	leaf	1	HS,S	2	no	no	no	0
SP00336		LID0516	25.0886	121.838	208.5	dem_20m_calculate	plant	Fagales	Fagaceae	Quercus	leaf	1	HS,S	2	no	no	no	0
SP00337		LID0516	25.0876	121.838	272	dem_20m_raw	plant	Crossosomatales	Staphyleaceae	Euscaphis	fruit	1	HS,S	2	no	no	no	0
SP00338		LID0516	25.0878	121.838	250	google_map_approximate	plant	Fagales	Fagaceae	Castanopsis	leaf	1	HS,S	2	no	no	no	0
SP00339		LID0516	25.0872	121.838	271	dem_20m_raw	plant	Zingiberales	Zingiberaceae	Hedychium	flower	1	HS,S	2	no	no	no	0
SP00340		LID0516	25.0872	121.838	271	dem_20m_raw	plant				fruit	1	HS,S	2	no	no	no	0
SP00341		LID0098	24.0007	121.01	949	dem_20m_raw	plant	Pinales	Pinaceae	Pinus	bark,fallen_fruit	2	HS,S	2	no	no	no	0
SP00342		LID0098	24.0007	121.01	949	dem_20m_raw	plant				flower	1	HS,S	2	no	no	no	0
SP00343		LID0098	24.0007	121.01	949	dem_20m_raw	plant	Laurales	Lauraceae		leaf	1	HS,S	2	no	no	no	0
SP00344	SK001	LID0098	24.0007	121.01	949	dem_20m_raw	plant	Fagales	Fagaceae	Quercus	leaf,fruit,litter	3	HS,S	2	no	no	yes	1	SR26	fruit	1	H	1
SP00345		LID0098	24.0007	121.01	949	dem_20m_raw	plant	Fagales	Fagaceae	Quercus	leaf	1	HS,S	2	no	no	no	0
SP00346	SK002	LID0098	24.0007	121.01	949	dem_20m_raw	plant	Fagales	Fagaceae	Quercus	leaf,soil	2	HS,S	2	no	no	no	0
SP00347	SK002	LID0098	24.0007	121.01	949	dem_20m_raw	plant				fruit	1	HS,S	2	no	no	no	0
SP00348		LID0098	24.0007	121.01	949	dem_20m_raw	plant	Fagales	Fagaceae	Lithocarpus	bark,fruit,litter	3	HS,S	2	no	no	no	0
SP00349		LID0113	23.9231	120.892	689.5	dem_20m_calculate	plant	Fagales	Fagaceae	Castanopsis	bark,litter	2	HS,S	2	no	no	no	0
SP00350		LID0113	23.9231	120.892	689.5	dem_20m_calculate	plant	Fagales	Fagaceae	Lithocarpus	leaf,bark	2	HS,S	2	no	no	no	0
SP00351		LID0113	23.9231	120.892	689.5	dem_20m_calculate	plant	Fagales	Fagaceae	Castanopsis	fruit	1	HS,S	2	no	no	no	0
SP00352		LID0113	23.9231	120.892	689.5	dem_20m_calculate	plant	Fagales	Fagaceae	Lithocarpus	litter	1	HS,S	2	no	no	no	0
SP00353		LID0113	23.9231	120.892	689.5	dem_20m_calculate	plant	Fagales	Fagaceae	Castanopsis	leaf,bark	2	HS,S	2	no	no	yes	2	SR27,SR28	leaf,bark	2	H	1
SP00354		LID0113	23.9231	120.892	689.5	dem_20m_calculate	plant	Fagales	Fagaceae	Lithocarpus	leaf,bark,litter	3	HS,S	2	no	no	no	0
SP00355		LID0113	23.9231	120.892	689.5	dem_20m_calculate	plant	Fagales	Fagaceae	Quercus	leaf,bark	2	HS,S	2	no	no	no	0
SP00356		LID0113	23.9231	120.892	689.5	dem_20m_calculate	plant	Fagales	Fagaceae	Quercus	bark,fruit,litter	3	HS,S	2	no	no	no	0
SP00357		LID0113	23.9231	120.892	689.5	dem_20m_calculate	plant	Fagales	Fagaceae	Quercus	leaf	1	HS,S	2	no	no	no	0
SP00358		LID0113	23.9231	120.892	689.5	dem_20m_calculate	plant	Fagales	Fagaceae	Lithocarpus	leaf	1	HS,S	2	no	no	no	0
SP00359		LID0113	23.9231	120.892	689.5	dem_20m_calculate	plant	Fagales	Fagaceae	Castanopsis	litter	1	HS,S	2	no	no	no	0
SP00360		LID0113	23.9231	120.892	689.5	dem_20m_calculate	plant	Laurales	Lauraceae	Cryptocarya	leaf,bark	2	HS,S	2	no	no	no	0
SP00361		LID0113	23.9231	120.892	689.5	dem_20m_calculate	plant	Fagales	Fagaceae	Lithocarpus	leaf,fruit	2	HS,S	2	no	no	no	0
SP00362		LID0113	23.9231	120.892	689.5	dem_20m_calculate	plant	Fagales	Fagaceae	Lithocarpus	fallen_fruit	1	HS,S	2	no	no	no	0
SP00363		LID0113	23.9231	120.892	689.5	dem_20m_calculate	plant	Fagales	Fagaceae	Quercus	bark,litter	2	HS,S	2	no	no	no	0
SP00364		LID0113	23.9231	120.892	689.5	dem_20m_calculate	plant	Fabales	Fabaceae	Calliandra	flower	1	HS,S	2	no	no	no	0
SP00365		LID0113	23.9231	120.892	689.5	dem_20m_calculate	plant	Fagales	Fagaceae	Castanopsis	leaf,bark,litter	3	HS,S	2	no	no	no	0
SP00366		LID0113	23.9231	120.892	689.5	dem_20m_calculate	plant	Fagales	Fagaceae	Lithocarpus	leaf	1	HS,S	2	no	no	no	0
SP00367		LID0113	23.9231	120.892	689.5	dem_20m_calculate	plant	Fagales	Fagaceae	Lithocarpus	fruit	1	HS,S	2	no	no	no	0
SP00368		LID0113	23.9231	120.892	689.5	dem_20m_calculate	plant	Fagales	Fagaceae	Castanopsis	litter	1	HS,S	2	no	no	no	0
SP00369		LID0113	23.9231	120.892	689.5	dem_20m_calculate	plant	Fagales	Fagaceae	Castanopsis	fruit	1	HS,S	2	no	no	no	0
SP00380			25.0438	121.616	50	google_map_approximate	plant	Fagales	Fagaceae	Quercus	leaf,twig,bark	1	W	1	no	no	no	0
SP00381			25.0438	121.616	50	google_map_approximate	plant	Fagales	Fagaceae	Quercus	leaf,twig,bark	1	W	1	no	no	no	0
SP00382			25.0421	121.613	66.014	GPS	plant	Fagales	Fagaceae	Quercus	leaf,twig,bark	1	W	1	no	no	no	0
SPA0001	AS003	LID0390	25.0448	121.614	78.266	GPS	plant	Rosales	Urticaceae	Debregeasia	leaf,twig,bark	3	HS,S,P	3	no	no	no	0
SPA0002	AS003	LID0390	25.0448	121.614	78.266	GPS	plant	Gentianales	Rubiaceae	Cephalanthus	leaf,twig,bark,fruit	4	HS,S,P	3	no	no	no	0
SPA0003	AS003	LID0390	25.0448	121.614	78.266	GPS	plant	Myrtales	Melastomataceae	Melastoma	leaf,twig,bark,flower,fruit,litter	6	HS,S,P	3	no	no	no	0
SPA0004	AS003	LID0390	25.0448	121.614	78.266	GPS	plant	Ericales	Lecythidaceae	Barringtonia	leaf,twig,bark,flower,soil,floral_abscission	6	HS,S,P	3	no	no	no	0
SPA0005	AS004	LID0390	25.0423	121.613	35.75	GPS	plant	Magnoliales	Magnoliaceae	Magnolia	leaf,twig,bark,soil,litter	5	HS,S,P	3	no	no	no	0
SPA0006	AS004	LID0390	25.0423	121.613	35.75	GPS	plant	Ericales	Pentaphylacaceae	Eurya	leaf,twig,bark	3	HS,S,P	3	no	no	no	0
SPA0008	AS004	LID0390	25.0423	121.613	35.75	GPS	plant	Brassicales	Capparaceae	Crateva	leaf,twig,bark,soil,litter	5	HS,S,P	3	no	no	no	0
SPA0010	AS004	LID0390	25.0423	121.613	35.75	GPS	plant	Apiales	Araliaceae	Heptapleurum	leaf,twig,bark,gall	4	HS,S,P	3	no	no	no	0
SPA0011	AS004	LID0390	25.0423	121.613	35.75	GPS	plant	Ranunculales	Ranunculaceae	Clematis	leaf,twig,flower	3	HS,S,P	3	no	no	no	0
SPA0012	AS004	LID0390	25.0423	121.613	35.75	GPS	plant	Malvales	Thymelaeaceae	Wikstroemia	leaf,twig,flower,fruit	4	HS,S,P	3	no	no	no	0
SPA0013	AS004	LID0390	25.0423	121.613	35.75	GPS	plant	Lamiales	Lamiaceae	Callicarpa	leaf,twig,bark,fruit	4	HS,S,P	3	no	no	no	0
SPA0014	AS002	LID0390	25.0421	121.613	66.014	GPS	plant	Dipsacales	Adoxaceae	Viburnum	leaf,twig,bark	3	HS,S,P	3	no	no	no	0
SPA0015	AS002	LID0390	25.0421	121.613	66.014	GPS	plant	Malpighiales	Euphorbiaceae	Triadica	leaf,twig	2	HS,S,P	3	no	no	no	0
SPA0016	AS002	LID0390	25.0421	121.613	66.014	GPS	plant	Myrtales	Lythraceae	Lagerstroemia	leaf,twig,bark,soil	4	HS,S,P	3	no	no	no	0
SPA0017	AS002	LID0390	25.0421	121.613	66.014	GPS	plant	Laurales	Lauraceae	Machilus	leaf,twig,bark,soil,litter	5	HS,S,P	3	no	no	no	0
SPA0023	AS005	LID0105	25.0453	121.613	90.137	GPS	plant	Ericales	Sapotaceae	Palaquium	leaf,twig,bark,soil	4	HS,S,P	3	no	no	yes	1	S1	soil	1	H	1
SPA0024	AS005	LID0105	25.0453	121.613	90.137	GPS	plant	Sapindales	Sapindaceae	Acer	leaf,twig,bark,fruit,soil,litter	6	HS,S,P	3	no	no	yes	1	S2	bark	1	S	1
SPA0025	AS005	LID0105	25.0453	121.613	90.137	GPS	plant	Sapindales	Sapindaceae	Koelreuteria	leaf,twig,bark,soil,litter	5	HS,S,P	3	no	no	yes	1	S3	litter	1	H	1
SPA0026	AS005	LID0105	25.0453	121.613	90.137	GPS	plant	Saxifragales	Altingiaceae	Liquidambar	leaf,twig,bark,soil,litter	5	HS,S,P	3	no	no	no	0
SPA0027	AS005	LID0105	25.0453	121.613	90.137	GPS	plant	Laurales	Lauraceae	Cinnamomum	leaf,twig,bark,soil,litter	5	HS,S,P	3	no	no	no	0
SPA0028	AS005	LID0105	25.0453	121.613	90.137	GPS	plant	Polypodiales	Polypodiaceae	Lemmaphyllum	whole	1	HS,S,P	3	no	no	yes	1	S4	whole	1	H	1
SPA0030	AS005	LID0105	25.0453	121.613	90.137	GPS	plant	Lamiales	Verbenaceae	Duranta	leaf,twig,bark,flower,fruit,litter	6	HS,S,P	3	no	no	no	0
SPA0032	AS006	LID0453	25.0397	121.61	26.852	GPS	plant	Rosales	Moraceae	Broussonetia	leaf,twig,bark,litter	4	HS,S,P	3	no	no	no	0
SPA0033	AS006	LID0453	25.0397	121.61	26.852	GPS	plant	Gentianales	Rubiaceae	Ixora	leaf,twig,flower	3	HS,S,P	3	no	no	no	0
SPA0035	AS007	LID0453	25.0399	121.61	45.365	GPS	plant	Laurales	Lauraceae	Machilus	leaf,twig,bark,soil,litter	5	HS,S,P	3	no	no	no	0
SPA0036	AS007	LID0453	25.0399	121.61	45.365	GPS	plant	Malpighiales	Phyllanthaceae	Bischofia	leaf,twig,bark,soil,litter	5	HS,S,P	3	no	no	no	0
SPA0037	AS008	LID0453	25.0401	121.61	67.743	GPS	plant	Malpighiales	Phyllanthaceae	Bischofia	leaf,twig,bark,soil,litter	5	HS,S,P	3	no	no	no	0
SPA0039	AS009	LID0453	25.0414	121.612	10.429	GPS	plant	Myrtales	Myrtaceae	Syzygium	leaf,twig,bark,fruit,soil,litter,fallen_fruit	7	HS,S,P	3	no	no	no	0
SPA0047	NG001	LID0107	25.033	121.609	94.898	GPS	plant	Laurales	Lauraceae	Machilus	leaf,twig,bark,soil,litter	5	HS,S,P	3	no	no	no	0
SPA0048	NG001	LID0107	25.033	121.609	94.898	GPS	plant	Fagales	Fagaceae	Castanopsis	leaf,twig,bark,soil,litter	5	HS,S,P	3	no	no	yes	1	S5	litter	1	S	1
SPA0049	NG002	LID0107	25.033	121.609	55.467	GPS	plant	Fagales	Fagaceae	Quercus	leaf,twig,bark,soil,litter	5	HS,S,P	3	no	no	yes	1	S6	soil	1	H	1
SPA0050	NG002	LID0107	25.033	121.609	55.467	GPS	plant	Malpighiales	Euphorbiaceae	Mallotus	leaf,twig,bark,soil,litter	5	HS,S,P	3	no	no	yes	1	S7	soil	1	S	1
SPA0051	NG002	LID0107	25.033	121.609	55.467	GPS	plant	Fagales	Fagaceae	Castanopsis	leaf,twig,bark,soil,litter	5	HS,S,P	3	no	no	no	0
SPA0052	NG003	LID0107	25.033	121.609	63.4	GPS	plant	Rosales	Moraceae	Ficus	leaf,twig,bark,fruit,soil,litter	6	HS,S,P	3	no	no	no	0
SPA0053	NG003	LID0107	25.033	121.609	63.4	GPS	plant	Ericales	Ebenaceae	Diospyros	leaf,twig,bark,soil,litter	5	HS,S,P	3	no	no	no	0
SPA0054	NG004	LID0107	25.0333	121.608	85.687	GPS	plant	Apiales	Araliaceae	Heptapleurum	leaf,twig,bark,soil,litter	5	HS,S,P	3	no	no	no	0
SPA0055	NG005	LID0107	25.033	121.607	89.477	GPS	plant	Myrtales	Myrtaceae	Syzygium	leaf,twig,bark,soil,litter	5	HS,S,P	3	no	no	no	0
SPA0056	NG006	LID0107	25.033	121.606	101.14	GPS	plant	Laurales	Lauraceae	Machilus	leaf,twig,bark,soil,litter	5	HS,S,P	3	no	no	no	0
SPA0057	NG006	LID0107	25.033	121.606	101.14	GPS	plant	Polypodiales	Aspleniaceae	Asplenium	whole	1	HS,S,P	3	no	no	no	0
SPA0058	NG006	LID0107	25.033	121.606	101.14	GPS	plant	Ericales	Pentaphylacaceae	Cleyera	leaf,twig,bark,soil,litter	5	HS,S,P	3	no	no	no	0
SPA0059	NG007	LID0107	25.033	121.604	120.754	GPS	plant	Crossosomatales	Staphyleaceae	Turpinia	leaf,twig,bark,fruit,soil,litter	6	HS,S,P	3	no	no	no	0
SPA0060	NG007	LID0107	25.033	121.604	120.754	GPS	plant	Ericales	Ebenaceae	Diospyros	leaf,twig,flower,soil,litter	5	HS,S,P	3	no	no	no	0
SPA0061	NG008	LID0107	25.033	121.604	129.163	GPS	plant	Laurales	Lauraceae	Machilus	leaf,twig,bark,soil,litter	5	HS,S,P	3	no	no	no	0
SPA0062	NG009	LID0107	25.0329	121.604	135.237	GPS	plant	Gentianales	Rubiaceae	Wendlandia	leaf,twig,bark,soil,litter	5	HS,S,P	3	no	no	no	0
SPA0063	NG010	LID0107	25.0331	121.602	160.698	GPS	plant	Myrtales	Myrtaceae	Syzygium	leaf,twig,bark,litter	4	HS,S,P	3	no	no	no	0
SPA0064	NG011	LID0107	25.0337	121.601	164.485	GPS	plant	Ericales	Primulaceae	Ardisia	leaf,twig,bark,soil,litter	5	HS,S,P	3	no	no	no	0
SPA0065	NG012	LID0107	25.0338	121.6	163.459	GPS	plant	Rosales	Moraceae	Ficus	leaf,twig,bark,fruit,soil,litter	6	HS,S,P	3	no	no	no	0
SPA0066	NG013	LID0107	25.0337	121.6	167.267	GPS	plant	Laurales	Lauraceae	Machilus	leaf,twig,bark,soil,litter	5	HS,S,P	3	no	no	no	0
SPA0080	FS020	LID0104	24.7629	121.586	651.232	GPS	plant	Fagales	Fagaceae	Quercus	leaf,twig,bark,soil,litter	5	HS,S,P	3	no	no	yes	1	S8	litter	1	H	1
SPA0081	FS016	LID0104	24.7628	121.585	607.079	GPS	plant	Fagales	Fagaceae	Lithocarpus	leaf,twig,bark,soil,litter	5	HS,S,P	3	no	no	no	0
SPA0082	FS021	LID0104	24.7627	121.585	619.758	GPS	plant	Fagales	Fagaceae	Quercus	leaf,twig,bark,soil,litter	5	HS,S,P	3	no	no	yes	1	S9	litter	1	S	1
SPA0083	FS021	LID0104	24.7627	121.585	624.929	GPS	plant	Fagales	Fagaceae	Quercus	leaf,twig,bark,soil,litter	5	HS,S,P	3	no	no	no	0
SPA0084	FS022	LID0104	24.7626	121.585	625.305	GPS	plant	Fagales	Fagaceae	Quercus	leaf,twig,bark,soil,litter	5	HS,S,P	3	no	no	yes	1	S10	leaf	1	S	1
SPA0085	FS023	LID0104	24.7624	121.585	635.776	GPS	plant	Fagales	Fagaceae	Quercus	leaf,twig,bark,soil,litter	5	HS,S,P	3	no	no	yes	1	S11	soil	1	H	1
SPA0086	FS017	LID0104	24.7623	121.585	637.996	GPS	plant	Fagales	Fagaceae	Quercus	leaf,twig,bark,soil,litter	5	HS,S,P	3	no	no	no	0
SPA0087	FS024	LID0104	24.7622	121.585	642.09	GPS	plant	Fagales	Fagaceae	Castanopsis	leaf,twig,bark,soil,litter	5	HS,S,P	3	no	no	no	0
SPA0088	FS024	LID0104	24.7621	121.585	643.063	GPS	plant	Fagales	Fagaceae	Quercus	leaf,twig,bark,soil,litter	5	HS,S,P	3	no	no	no	0
SPA0089	FS025	LID0104	24.7623	121.585	646.094	GPS	plant	Fagales	Fagaceae	Lithocarpus	leaf,twig,bark,soil,litter	5	HS,S,P	3	no	no	no	0
SPA0090	FS025	LID0104	24.7622	121.585	647.098	GPS	plant	Fagales	Fagaceae	Quercus	leaf,twig,bark,soil,litter	5	HS,S,P	3	no	no	no	0
SPA0091	FS025	LID0104	24.7622	121.585	646.343	GPS	plant	Fagales	Fagaceae	Lithocarpus	leaf,twig,bark,soil,litter	5	HS,S,P	3	no	no	no	0
SPA0092	FS025	LID0104	24.7623	121.585	648.562	GPS	plant	Fagales	Fagaceae	Lithocarpus	leaf,twig,bark,soil,litter	5	HS,S,P	3	no	no	no	0
SPA0093	FS026	LID0104	24.7621	121.584	649.003	GPS	plant	Fagales	Fagaceae	Castanopsis	leaf,twig,bark,soil,litter	5	HS,S,P	3	no	no	no	0
SPA0094	FS026	LID0104	24.7621	121.584	649.339	GPS	plant	Fagales	Fagaceae	Castanopsis	leaf,twig,bark,soil,litter	5	HS,S,P	3	no	no	no	0
SPA0095	FS026	LID0104	24.7621	121.584	648.793	GPS	plant	Fagales	Fagaceae	Castanopsis	leaf,twig,bark,soil,litter	5	HS,S,P	3	no	no	no	0
SPA0096	FS025	LID0104	24.7621	121.584	651.429	GPS	plant	Fagales	Fagaceae	Quercus	leaf,twig,bark,soil,litter	5	HS,S,P	3	no	no	no	0
SPA0097	FS025	LID0104	24.7621	121.585	650.803	GPS	plant	Fagales	Fagaceae	Quercus	leaf,twig,bark,soil,litter	5	HS,S,P	3	no	no	no	0
SPA0098	FS027	LID0104	24.762	121.585	653.77	GPS	plant	Fagales	Fagaceae	Lithocarpus	leaf,twig,bark,soil,litter	5	HS,S,P	3	no	no	no	0
SPA0099	FS028	LID0104	24.7619	121.585	646.87	GPS	plant	Fagales	Fagaceae	Quercus	leaf,twig,bark,soil,litter	5	HS,S,P	3	no	no	no	0
SPA0100	FS028	LID0104	24.7619	121.585	647.139	GPS	plant	Fagales	Fagaceae	Quercus	leaf,twig,bark,soil,litter	5	HS,S,P	3	no	no	no	0
SPA0101	FS018	LID0104	24.7618	121.585	645.389	GPS	plant	Fagales	Fagaceae	Castanopsis	leaf,twig,bark,soil,litter	5	HS,S,P	3	no	no	no	0
SPA0102	FS029	LID0104	24.7617	121.584	643.74	GPS	plant	Fagales	Fagaceae	Castanopsis	leaf,twig,bark,soil,litter	5	HS,S,P	3	no	no	yes	1	S12	litter	1	H	1
SPA0103	FS030	LID0104	24.7618	121.584	643.624	GPS	plant	Fagales	Fagaceae	Lithocarpus	leaf,twig,bark,soil,litter	5	HS,S,P	3	no	no	no	0
SPA0104	FS031	LID0104	24.7622	121.585	649.435	GPS	plant	Fagales	Fagaceae	Lithocarpus	leaf,twig,bark,soil,litter	5	HS,S,P	3	no	no	no	0
SPA0105	FS032	LID0104	24.7624	121.585	647.093	GPS	plant	Fagales	Fagaceae	Lithocarpus	leaf,twig,bark,soil,litter	5	HS,S,P	3	no	no	no	0
SPA0106	FS032	LID0104	24.7624	121.585	646.304	GPS	plant	Fagales	Fagaceae	Quercus	leaf,twig,bark,soil,litter	5	HS,S,P	3	no	no	no	0
SPA0107	FS032	LID0104	24.7624	121.585	648.17	GPS	plant	Fagales	Fagaceae	Quercus	leaf,twig,bark,soil,litter	5	HS,S,P	3	no	no	yes	1	S13	litter	1	H	1
SPA0108	FS033	LID0104	24.7627	121.586	647.7	GPS	plant	Fagales	Fagaceae	Quercus	leaf,twig,bark,soil,litter	5	HS,S,P	3	no	no	yes	1	S14	litter	1	H	1
SPA0109	FS033	LID0104	24.7628	121.586	652.064	GPS	plant	Fagales	Fagaceae	Quercus	leaf,twig,bark,soil,litter	5	HS,S,P	3	no	no	yes	1	S15	leaf	1	H	1
SPA0110	FS034	LID0104	24.7596	121.585	641.649	GPS	plant	Fagales	Fagaceae	Quercus	leaf,twig,bark,soil,litter	5	HS,S,P	3	no	no	no	0
SPA0120	NG014	LID0525	25.0394	121.618	62.892	GPS	plant	Arecales	Arecaceae	Archontophoenix	root,soil,litter	3	HS,S,P	3	no	no	no	0
SPA0121	NG015	LID0525	25.0392	121.619	57.998	GPS	plant	Malpighiales	Euphorbiaceae	Mallotus	leaf,twig,bark,flower,soil,litter	6	HS,S,P	3	no	no	no	0
SPA0122	NG016	LID0525	25.0391	121.618	64.225	GPS	plant	Apiales	Araliaceae	Heptapleurum	leaf,twig,bark,soil,litter	5	HS,S,P	3	no	no	no	0
SPA0123	NG017	LID0525	25.039	121.618	61.62	GPS	plant	Gentianales	Rubiaceae	Ixora	leaf,twig,flower,soil,litter	5	HS,S,P	3	no	no	no	0
SPA0124	NG018	LID0525	25.0385	121.618	56.952	GPS	plant	Fabales	Fabaceae	Acacia	leaf,twig,bark,soil,litter	5	HS,S,P	3	no	no	no	0
SPA0125	NG019	LID0525	25.0383	121.618	54.189	GPS	plant	Ericales	Actinidiaceae	Saurauia	leaf,twig,bark,soil,litter	5	HS,S,P	3	no	no	no	0
SPA0126	NG020	LID0525	25.0382	121.618	65.126	GPS	plant	Saxifragales	Iteaceae	Itea	leaf,twig,bark,soil,litter	5	HS,S,P	3	no	no	no	0
SPA0127	NG021	LID0525	25.0381	121.619	64.856	GPS	plant	Laurales	Lauraceae	Machilus	leaf,twig,bark,soil,litter	5	HS,S,P	3	no	no	no	0
SPA0128	NG022	LID0525	25.0378	121.619	59.98	GPS	plant	Malpighiales	Euphorbiaceae	Vernicia	leaf,twig,bark,soil,litter	5	HS,S,P	3	no	no	no	0
SPA0129	NG023	LID0525	25.0377	121.619	69.001	GPS	plant	Proteales	Sabiaceae	Meliosma	leaf,twig,bark,soil,litter	5	HS,S,P	3	no	no	no	0
SPA0130	NG024	LID0525	25.0374	121.619	80.026	GPS	plant	Ericales	Primulaceae	Ardisia	leaf,twig,bark,soil,litter	5	HS,S,P	3	no	no	no	0
SPA0131	NG025	LID0525	25.0371	121.619	94.951	GPS	plant	Ericales	Pentaphylacaceae	Cleyera	leaf,twig,bark,soil,litter	5	HS,S,P	3	no	no	no	0
SPA0132	NG026	LID0525	25.0369	121.619	91.634	GPS	plant	Ericales	Ebenaceae	Diospyros	leaf,twig,bark,soil,litter	5	HS,S,P	3	no	no	no	0
SPA0133	NG027	LID0525	25.0369	121.619	88.295	GPS	plant	Fagales	Fagaceae	Castanopsis	leaf,twig,bark,soil,litter	5	HS,S,P	3	no	no	no	0
SPA0134	NG028	LID0525	25.0365	121.619	70.628	GPS	plant	Apiales	Araliaceae	Heptapleurum	leaf,twig,bark,soil,litter	5	HS,S,P	3	no	no	no	0
SPA0135	NG029	LID0525	25.0366	121.619	64.395	GPS	plant	Oxalidales	Oxalidaceae	Averrhoa	leaf,twig,bark,soil,litter	5	HS,S,P	3	no	no	no	0
SPA0136	NG030	LID0105	25.0454	121.613	18.199	GPS	plant	Rosales	Moraceae	Ficus	leaf,twig,bark,soil,litter	5	HS,S,P	3	no	no	no	0
SPA0137	NG030	LID0105	25.0454	121.613	18.199	GPS	plant	Rosales	Moraceae	Ficus	leaf,twig,bark,root,soil,litter	6	HS,S,P	3	no	no	no	0
SPA0138	NG030	LID0105	25.0454	121.613	18.199	GPS	plant	Zingiberales	Zingiberaceae	Hedychium	leaf,flower,litter	3	HS,S,P	3	no	no	yes	1	S16	litter	1	S	1
SPA0139	NG030	LID0105	25.0454	121.613	18.199	GPS	plant	Rosales	Cannabaceae	Celtis	leaf,twig,bark,soil	4	HS,S,P	3	no	no	no	0
SPA0140	SJ001	LID0106	25.0355	121.678	558.951	GPS	plant	Laurales	Lauraceae	Machilus	leaf,twig,bark,soil,litter	5	HS,S,P	3	no	no	no	0
SPA0141	SJ001	LID0106	25.0355	121.678	558.951	GPS	plant	Gentianales	Rubiaceae	Psychotria	whole	1	HS,S,P	3	no	no	no	0
SPA0142	SJ001	LID0106	25.0355	121.678	558.951	GPS	plant	Lamiales	Lamiaceae	Callicarpa	leaf,twig,bark,soil,litter	5	HS,S,P	3	no	no	no	0
SPA0143	SJ002	LID0106	25.0371	121.677	490.172	GPS	plant	Ericales	Primulaceae	Ardisia	leaf,twig,bark,soil,litter	5	HS,S,P	3	no	no	no	0
SPA0144	SJ002	LID0106	25.0371	121.677	490.172	GPS	plant	Ericales	Primulaceae	Ardisia	leaf,twig,bark,soil,litter	5	HS,S,P	3	no	no	yes	1	S17	leaf	1	S	1
SPA0145	SJ002	LID0106	25.0371	121.677	490.172	GPS	plant	Polypodiales	Polypodiaceae	Lemmaphyllum	whole	1	HS,S,P	3	no	no	yes	1	S18	whole	1	H	1
SPA0146	SJ002	LID0106	25.0371	121.677	490.172	GPS	plant				whole	1	HS,S,P	3	no	no	no	0
SPA0147	SJ003	LID0106	25.0411	121.676	502.381	GPS	plant	Saxifragales	Altingiaceae	Liquidambar	leaf,twig,bark,soil,litter	5	HS,S,P	3	no	no	no	0
SPA0148	SJ004	LID0106	25.0415	121.676	501.107	GPS	plant	Malpighiales	Euphorbiaceae	Mallotus	leaf,twig,flower,litter	4	HS,S,P	3	no	no	no	0
SPA0149	SJ004	LID0106	25.0415	121.676	501.107	GPS	plant	Ericales	Ericaceae	Rhododendron	leaf,twig,bark,flower,soil,litter	6	HS,S,P	3	no	no	no	0
SPA0150	SJ005	LID0106	25.0415	121.676	501.107	GPS	plant	Lamiales	Bignoniaceae	Handroanthus	leaf	1	HS,S,P	3	no	no	no	0
SPA0151	SJ005	LID0106	25.0412	121.673	490.163	GPS	plant	Selaginellales	Selaginellaceae	Selaginella	whole	1	HS,S,P	3	no	no	no	0
SPA0152	SJ005	LID0106	25.0412	121.673	490.163	GPS	plant	Polypodiales	Polypodiaceae	Lemmaphyllum	whole	1	HS,S,P	3	no	no	no	0
SPA0153	SJ006	LID0106	25.0435	121.671	486.193	GPS	plant	Rosales	Rosaceae	Prunus	leaf,twig,bark,soil,litter,sap	6	HS,S,P	3	no	no	no	0
SPA0154	SJ007	LID0106	25.0436	121.671	480.901	GPS	plant	Rosales	Moraceae	Ficus	leaf,twig,bark,soil,litter	5	HS,S,P	3	no	no	no	0
SPA0155	SJ007	LID0106	25.0436	121.671	480.901	GPS	plant	Polypodiales	Polypodiaceae	Lemmaphyllum	whole	1	HS,S,P	3	no	no	no	0
SPA0156	SJ008	LID0106	25.0468	121.669	452.945	GPS	plant	Fabales	Fabaceae	Acacia	leaf,twig,bark,soil,litter	5	HS,S,P	3	no	no	no	0
SPA0157	SJ008	LID0106	25.0468	121.669	452.945	GPS	plant	Saxifragales	Altingiaceae	Liquidambar	leaf,twig,bark,soil,litter	5	HS,S,P	3	no	no	no	0
SPA0158	SJ009	LID0106	25.0467	121.669	441.431	GPS	plant	Cytheales	Cyatheaceae	Sphaeropteris	leaf,twig,bark,soil,litter	5	HS,S,P	3	no	no	no	0
SPA0159	SJ009	LID0106	25.0467	121.669	441.431	GPS	plant	Gleicheniales	Gleicheniaceae	Dicranopteris	leaf	1	HS,S,P	3	no	no	no	0
SPA0160	SJ009	LID0106	25.0467	121.669	441.431	GPS	plant	Schizaeales	Lygodiaceae	Lygodium	leaf,twig,bark,soil,litter	5	HS,S,P	3	no	no	no	0
SPA0161	SJ009	LID0106	25.0467	121.669	441.431	GPS	plant	Polypodiales	Athyriaceae	Deparia	leaf	1	HS,S,P	3	no	no	no	0
SPA0162	SJ010	LID0106	25.0515	121.665	268.407	GPS	plant	Rosales	Moraceae	Ficus	leaf,twig,bark,soil,litter	5	HS,S,P	3	no	no	no	0
SPA0163	SJ010	LID0106	25.0515	121.665	268.407	GPS	plant	Polypodiales	Polypodiaceae	Lemmaphyllum	whole	1	HS,S,P	3	no	no	no	0
SPA0164	SJ010	LID0106	25.0515	121.665	268.407	GPS	plant	Polypodiales	Polypodiaceae	Lemmaphyllum	whole	1	HS,S,P	3	no	no	no	0
SPA0172	SD001	LID0117	25.0552	121.615	300.622	GPS	plant	Crossosomatales	Staphyleaceae	Euscaphis	leaf,twig,bark,fruit,soil,litter	6	HS,S,P	3	no	no	no	0
SPA0173	SD001	LID0117	25.0552	121.615	300.622	GPS	plant	Polypodiales	Polypodiaceae	Lemmaphyllum	whole	1	HS,S,P	3	no	no	no	0
SPA0174	SD002	LID0117	25.0015	121.68	295.018	GPS	plant	Rosales	Cannabaceae	Trema	leaf,twig,bark,soil,litter	5	HS,S,P	3	no	no	no	0
SPA0175	SD001	LID0117	25.0552	121.615	300.622	GPS	plant	Sapindales	Anacardiaceae	Toxicodendron	leaf,twig,fruit	3	HS,S,P	3	no	no	no	0
SPA0176	SD003	LID0117	25.0035	121.68	262.68	GPS	plant	Crossosomatales	Staphyleaceae	Euscaphis	leaf,twig,bark,soil,litter	5	HS,S,P	3	no	no	no	0
SPA0177	SD003	LID0117	25.0035	121.68	262.68	GPS	plant	Polypodiales	Polypodiaceae	Lemmaphyllum	whole	1	HS,S,P	3	no	no	no	0
SPA0178	SD003	LID0117	25.0035	121.68	262.68	GPS	plant	Rosales	Moraceae	Ficus	leaf,twig,bark,soil,litter	5	HS,S,P	3	no	no	no	0
SPA0179	SD004	LID0117	25.001	121.682	292.473	GPS	plant	Ericales	Actinidiaceae	Saurauia	leaf,twig,bark,soil,litter	5	HS,S,P	3	no	no	no	0
SPA0180	SD004	LID0117	25.001	121.682	292.473	GPS	plant	Ericales	Primulaceae	Ardisia	leaf,twig,flower,fruit,soil,litter	6	HS,S,P	3	no	no	no	0
SPA0181	SD005	LID0117	24.9992	121.686	330.597	GPS	plant	Malpighiales	Euphorbiaceae	Vernicia	leaf,twig,bark,soil,litter	5	HS,S,P	3	no	no	no	0
SPA0182	SD005	LID0117	24.9992	121.686	330.597	GPS	plant	Polypodiales	Polypodiaceae	Lemmaphyllum	whole	1	HS,S,P	3	no	no	no	0
SPA0183	SD005	LID0117	24.9992	121.686	330.597	GPS	plant	Polypodiales	Aspleniaceae	Asplenium	whole	1	HS,S,P	3	no	no	no	0
SPA0184	SD006	LID0117	24.999	121.686	335.048	GPS	plant	Apiales	Araliaceae	Aralia	leaf,twig,bark,soil	4	HS,S,P	3	no	no	no	0
SPA0185	SD007	LID0117	24.9996	121.685	333.344	GPS	plant	Ericales	Pentaphylacaceae	Cleyera	leaf,twig,fruit,litter	4	HS,S,P	3	no	no	no	0
SPA0186	SD007	LID0117	24.9996	121.685	333.344	GPS	plant	Laurales	Lauraceae	Cinnamomum	leaf,twig,fruit,litter	4	HS,S,P	3	no	no	no	0
SPA0187	SD008	LID0117	25.0033	121.687	270.048	GPS	plant	Malpighiales	Phyllanthaceae	Bischofia	leaf,twig,bark,soil,litter,fallen_fruit	6	HS,S,P	3	no	no	no	0
SPA0188	SD008	LID0117	25.0033	121.687	270.048	GPS	plant	Polypodiales	Polypodiaceae	Lemmaphyllum	whole	1	HS,S,P	3	no	no	no	0
SPA0189	SD009	LID0117	25.0029	121.687	261.763	GPS	plant	Sapindales	Sapindaceae	Koelreuteria	leaf,twig,bark,soil,litter	5	HS,S,P	3	no	no	yes	1	XI02	bark	1	H	1
SPA0190	SD010	LID0117	25.0026	121.688	254.845	GPS	plant	Ericales	Actinidiaceae	Saurauia	leaf,twig,flower,fruit,litter	5	HS,S,P	3	no	no	no	0
SPA0191	NG031	LID0540	25.0289	121.623	125.843	GPS	plant	Malpighiales	Salicaceae	Salix	soil,litter	2	HS,S,P	3	no	no	no	0
SPA0193	SJ011	LID0536	25.0453	121.614	248.743	GPS	plant	Laurales	Lauraceae	Machilus	leaf,twig,bark,soil,litter	5	HS,S,P	3	no	no	no	0
SPA0194	SJ011	LID0536	25.0453	121.614	248.743	GPS	plant	Polypodiales	Polypodiaceae	Lemmaphyllum	whole	1	HS,S,P	3	no	no	no	0
SPA0195	SJ011	LID0536	25.0453	121.614	248.743	GPS	plant	Polypodiales	Aspleniaceae	Asplenium	whole	1	HS,S,P	3	no	no	no	0
SPA0196	SJ011	LID0536	25.0453	121.614	248.743	GPS	plant	Asparagales	Amaryllidaceae	Crinum	leaf,flower,fruit,soil,litter	5	HS,S,P	3	no	no	no	0
SPA0197	SJ012	LID0536	25.0536	121.676	240.973	GPS	plant	Malpighiales	Phyllanthaceae	Bischofia	leaf,twig,bark,soil,litter	5	HS,S,P	3	no	no	no	0
SPA0198	SJ013	LID0536	25.0537	121.675	227.207	GPS	plant	Sapindales	Rutaceae	Tetradium	leaf,twig,flower	3	HS,S,P	3	no	no	no	0
SPA0199	SJ013	LID0536	25.0537	121.675	227.207	GPS	plant	Rosales	Moraceae	Ficus	leaf,twig,fruit	3	HS,S,P	3	no	no	no	0
SPA0200	SJ014	LID0536	25.0566	121.673	166.352	GPS	plant	Malpighiales	Euphorbiaceae	Vernicia	leaf,twig,bark,soil,litter	5	HS,S,P	3	no	no	no	0
SPA0201	SJ014	LID0536	25.0566	121.673	166.352	GPS	plant	Rosales	Moraceae	Morus	leaf,twig,bark,flower,soil,litter	6	HS,S,P	3	no	no	no	0
SPA0202	SJ014	LID0536	25.0566	121.673	166.352	GPS	plant	Polypodiales	Polypodiaceae	Lemmaphyllum	whole	1	HS,S,P	3	no	no	no	0
SPA0203	SJ015	LID0536	25.0569	121.673	155.035	GPS	plant	Laurales	Lauraceae	Machilus	leaf,twig,bark,soil,litter	5	HS,S,P	3	no	no	no	0
SPA0204	SJ015	LID0536	25.0569	121.673	155.035	GPS	plant	Sapindales	Sapindaceae	Dimocarpus	leaf,twig,bark,soil,litter	5	HS,S,P	3	no	no	no	0
SPA0205	SJ015	LID0536	25.0569	121.673	155.035	GPS	plant	Malpighiales	Euphorbiaceae	Vernicia	leaf,twig,bark,soil,litter	5	HS,S,P	3	no	no	no	0
SPA0206	SJ016	LID0541	25.0143	121.699	154.405	GPS	plant	Fabales	Fabaceae	Bauhinia	leaf,twig,bark,soil,litter	5	HS,S,P	3	no	no	no	0
SPA0207	SJ016	LID0541	25.0143	121.699	154.405	GPS	plant	Polypodiales	Polypodiaceae	Lemmaphyllum	whole	1	HS,S,P	3	no	no	no	0
SPA0208	SJ016	LID0541	25.0143	121.699	154.405	GPS	plant	Fabales	Fabaceae	Archidendron	leaf,twig,soil,litter	4	HS,S,P	3	no	no	no	0
SPA0209	SJ016	LID0541	25.0143	121.699	154.405	GPS	plant	Liliales	Smilacaceae	Smilax	leaf,litter	2	HS,S,P	3	no	no	no	0
SPA0210	SJ017	LID0541	25.0137	121.699	160.537	GPS	plant	Rosales	Urticaceae	Boehmeria	leaf,twig,flower,litter	4	HS,S,P	3	no	no	no	0
SPA0216	XD003	LID0542	24.8856	121.575	466.104	GPS	plant	Magnoliales	Magnoliaceae	Magnolia	leaf,twig,bark,soil,litter	5	HS,S,P	3	no	no	no	0
SPA0217	XD004	LID0542	24.8857	121.574	472.081	GPS	plant	Ericales	Primulaceae	Ardisia	leaf,twig,bark,fruit,soil,litter	6	HS,S,P	3	no	no	no	0
SPA0218	XD005	LID0542	24.886	121.574	474.652	GPS	plant	Lamiales	Linderniaceae	Orenia	leaf,flower	2	HS,S,P	3	no	no	no	0
SPA0219	XD005	LID0542	24.886	121.574	474.652	GPS	plant	Rosales	Cannabaceae	Trema	leaf,twig,bark,soil,litter	5	HS,S,P	3	no	no	no	0
SPA0220	XD006	LID0542	24.8877	121.567	410.79	GPS	plant	Fagales	Fagaceae	Lithocarpus	leaf,twig,bark,root,soil,litter,cupule_abscission	7	HS,S,P	3	no	no	no	0
SPA0221	XD006	LID0542	24.8877	121.567	410.79	GPS	plant	Laurales	Lauraceae	Cinnamomum	leaf,twig,bark,soil,litter	5	HS,S,P	3	no	no	no	0
SPA0222	XD006	LID0542	24.8877	121.567	410.79	GPS	plant	Polypodiales	Polypodiaceae	Lemmaphyllum	whole	1	HS,S,P	3	no	no	no	0
SPA0223	XD007	LID0542	24.8891	121.568	391.834	GPS	plant	Rosales	Rosaceae	Photinia	leaf,twig,bark,soil,litter	5	HS,S,P	3	no	no	no	0
SPA0224	XD007	LID0542	24.8891	121.568	391.834	GPS	plant	Polypodiales	Polypodiaceae	Lemmaphyllum	whole	1	HS,S,P	3	no	no	no	0
SPA0225	XD008	LID0542	24.8927	121.569	340.775	GPS	plant	Ericales	Pentaphylacaceae	Cleyera	leaf,twig,bark,soil,litter	5	HS,S,P	3	no	no	no	0
SPA0226	XD008	LID0542	24.8927	121.569	340.775	GPS	plant	Polypodiales	Polypodiaceae	Pyrrosia	whole	1	HS,S,P	3	no	no	no	0
SPA0227	XD008	LID0542	24.8927	121.569	340.775	GPS	plant	Polypodiales	Nephrolepidaceae	Nephrolepis	whole	1	HS,S,P	3	no	no	no	0
SPA0228	XD009	LID0542	24.8923	121.569	347.054	GPS	plant	Pinales	Cupressaceae	Calocedrus	leaf,twig,bark,soil,litter	5	HS,S,P	3	no	no	no	0
SPA0229	XD010	LID0542	24.8983	121.569	225.068	GPS	plant	Malpighiales	Euphorbiaceae	Triadica	leaf,twig,bark,soil,litter,fallen_fruit	6	HS,S,P	3	no	no	no	0
SPA0230	XD010	LID0542	24.8983	121.569	225.068	GPS	plant	Polypodiales	Polypodiaceae	Lemmaphyllum	whole	1	HS,S,P	3	no	no	no	0
SPA0231	XD010	LID0542	24.8983	121.569	225.068	GPS	plant	Sapindales	Rutaceae	Murraya	leaf,twig,bark,soil,litter	5	HS,S,P	3	no	no	no	0
SPA0232	XD010	LID0542	24.8983	121.569	225.068	GPS	plant	Rosales	Moraceae	Broussonetia	leaf,twig,soil	3	HS,S,P	3	no	no	no	0
SPA0233	PL002	LID0538	24.9467	121.723	225.816	GPS	plant	Saxifragales	Altingiaceae	Liquidambar	leaf,twig,bark,soil,litter	5	HS,S,P	3	no	no	no	0
SPA0234	PL003	LID0538	24.9486	121.73	252.437	GPS	plant	Laurales	Lauraceae	Machilus	leaf,twig,bark,soil,litter	5	HS,S,P	3	no	no	no	0
SPA0235	PL003	LID0538	24.9486	121.73	252.437	GPS	plant	Polypodiales	Polypodiaceae	Lemmaphyllum	whole	1	HS,S,P	3	no	no	no	0
SPA0236	PL004	LID0538	24.953	121.738	326.735	GPS	plant	Fagales	Fagaceae	Quercus	leaf,twig,bark,soil,litter	5	HS,S,P	3	no	no	no	0
SPA0237	PL007	LID0538	24.9662	121.737	325.705	GPS	plant	Laurales	Lauraceae	Litsea	leaf,twig,bark,fruit,soil,litter	6	HS,S,P	3	no	no	no	0
SPA0238	PL007	LID0538	24.9662	121.737	325.705	GPS	plant	Gentianales	Rubiaceae	Gardenia	leaf,twig,litter	3	HS,S,P	3	no	no	no	0
SPA0239	PL008	LID0538	24.9657	121.75	352.383	GPS	plant	Crossosomatales	Staphyleaceae	Turpinia	leaf,twig,litter	3	HS,S,P	3	no	no	no	0
SPA0240	PL010	LID0538	24.9651	121.754	357.732	GPS	plant	Ericales	Pentaphylacaceae	Cleyera	leaf,twig,bark,soil,litter	5	HS,S,P	3	no	no	no	0
SPA0241	PL011	LID0538	24.9628	121.763	281.622	GPS	plant	Fagales	Fagaceae	Quercus	leaf,twig	2	HS,S,P	3	no	no	no	0
SPA0242	PL012	LID0538	24.9635	121.763	276.361	GPS	plant	Sapindales	Rutaceae	Citrus	leaf,twig,bark,soil,litter	5	HS,S,P	3	no	no	no	0
SPA0243	PL012	LID0538	24.9635	121.763	276.361	GPS	plant	Polypodiales	Polypodiaceae	Lemmaphyllum	whole	1	HS,S,P	3	no	no	no	0
SPA0244	PL012	LID0538	24.9635	121.763	276.361	GPS	plant	Zingiberales	Zingiberaceae	Hedychium	leaf,root	2	HS,S,P	3	no	no	no	0
SPA0245	PL014	LID0538	24.9712	121.778	324.248	GPS	plant	Malpighiales	Phyllanthaceae	Bridelia	leaf,twig,flower,fruit	4	HS,S,P	3	no	no	no	0
SPA0246	PL015	LID0538	24.9705	121.784	409.023	GPS	plant	Laurales	Lauraceae	Machilus	leaf,twig,bark,soil	4	HS,S,P	3	no	no	no	0
SPA0247	PL015	LID0538	24.9705	121.784	409.023	GPS	plant	Gentianales	Rubiaceae	Psychotria	whole	1	HS,S,P	3	no	no	no	0
SPA0249		LID0539	24.1806	121.31	2580	google_map_approximate	plant	Proteales	Sabiaceae	Meliosma	leaf,twig,bark,soil,litter	5	HS,S,W	3	no	no	no	0
SPA0250	SPA0250	LID0539	24.0804	121.168	2080.29	GPS	plant	Fagales	Fagaceae	Castanopsis	leaf,twig,bark,soil,litter	5	HS,S,W	3	no	no	no	0
SPA0251	SPA0251	LID0539	24.0806	121.168	2080.22	GPS	plant	Laurales	Lauraceae	Machilus	leaf,twig,bark,soil,litter	5	HS,S,W	3	no	no	no	0
SPA0252	SPA0252	LID0539	24.0805	121.168	2075.99	GPS	plant	Proteales	Sabiaceae	Meliosma	leaf,twig,bark,soil,litter	5	HS,S,W	3	no	no	no	0
SPA0253	SPA0253	LID0539	24.0804	121.167	2072.47	GPS	plant	Aquifoliales	Aquifoliaceae	Ilex	leaf,twig,bark,soil	4	HS,S,W	3	no	no	no	0
SPA0254	SPA0254	LID0539	24.0804	121.167	2068.09	GPS	plant	Fagales	Fagaceae	Quercus	leaf,twig,bark,soil,litter	5	HS,S,W	3	no	no	no	0
SPA0255	SPA0255	LID0092	24.0916	121.176	1992.96	GPS	plant	Fagales	Juglandaceae	Juglans	leaf,twig,bark,soil,litter	5	HS,S,W	3	no	no	no	0
SPA0256	SPA0256	LID0092	24.0917	121.176	2057.27	GPS	plant	Fagales	Juglandaceae	Juglans	leaf,twig,bark,soil,litter	5	HS,S,W	3	no	no	no	0
SPA0257	SPA0257	LID0092	24.0917	121.176	2059.62	GPS	plant	Rosales	Rosaceae	Eriobotrya	leaf,twig,bark,soil,litter	5	HS,S,W	3	no	no	no	0
SPA0258	SPA0258	LID0092	24.0918	121.176	2056.44	GPS	plant	Pinales	Cupressaceae	Taiwania	leaf,twig,bark,soil,litter	5	HS,S,W	3	no	no	no	0
SPA0259	SPA0259	LID0092	24.092	121.176	2058.76	GPS	plant	Rosales	Rosaceae	Eriobotrya	leaf,twig,bark,soil,litter	5	HS,S,W	3	no	no	no	0
SPA0260	SPA0260	LID0092	24.0919	121.176	2055.31	GPS	plant	Cucurbitales	Cucurbitaceae	Thladiantha	leaf,flower	2	HS,S,W	3	no	no	no	0
SPA0261	SPA0261	LID0092	24.0921	121.176	2056.21	GPS	plant	Cornales	Hydrangeaceae	Deutzia	leaf,twig,bark,soil,litter	5	HS,S,W	3	no	no	no	0
SPA0262	SPA0262	LID0092	24.0922	121.176	2054.97	GPS	plant	Rosales	Rosaceae	Eriobotrya	leaf,twig,bark,soil,litter	5	HS,S,W	3	no	no	no	0
SPA0263	SPA0263	LID0092	24.0922	121.176	2052.44	GPS	plant	Sapindales	Sapindaceae	Acer	leaf,twig,bark,soil,litter	5	HS,S,W	3	no	no	no	0
SPA0264	SPA0264	LID0092	24.0921	121.176	2052.74	GPS	plant	Sapindales	Sapindaceae	Acer	leaf,twig,bark,soil,litter	5	HS,S,W	3	no	no	no	0
SPA0265	SPA0265	LID0092	24.092	121.176	2054.11	GPS	plant	Poales	Poaceae	Yushania	leaf,twig	2	HS,S,W	3	no	no	no	0
SPA0266	SPA0266	LID0092	24.092	121.177	2051.43	GPS	plant	Apiales	Araliaceae	Fatsia	leaf,bark,soil,petiole	4	HS,S,W	3	no	no	no	0
SPA0267	SPA0267	LID0092	24.0918	121.177	2048.96	GPS	plant				bark,soil,litter	3	HS,S,W	3	no	no	no	0
SPA0268	SPA0268	LID0092	24.0916	121.176	2068.58	GPS	plant				bark,soil	2	HS,S,W	3	no	no	no	0
SPA0269	SPA0269	LID0092	24.0917	121.176	2067.34	GPS	plant				leaf,twig,bark,soil,litter	5	HS,S,W	3	no	no	no	0
SPA0270	SPA0270	LID0092	24.0917	121.176	2068.68	GPS	plant				bark,litter	2	HS,S,W	3	no	no	no	0
SPA0271	SPA0271	LID0092	24.0917	121.176	2066.64	GPS	plant	Rosales	Ulmaceae	Ulmus	bark,soil	2	HS,S,W	3	no	no	no	0
SPA0272	SPA0272	LID0092	24.0917	121.176	2066.97	GPS	plant				bark,soil	2	HS,S,W	3	no	no	no	0
SPA0273	SPA0273	LID0092	24.0917	121.176	2066.97	GPS	plant				twig	1	HS,S,W	3	no	no	no	0
SPA0274	SPA0274	LID0092	24.0918	121.176	2066.05	GPS	plant	Lamiales	Oleaceae	Fraxinus	leaf,twig,bark,soil,litter	5	HS,S,W	3	no	no	no	0
SPA0275	SPA0275	LID0092	24.0916	121.176	2066.03	GPS	plant	Laurales	Lauraceae	Machilus	leaf,twig,bark,soil,litter,gall	6	HS,S,W	3	no	no	no	0
SPA0276	SPA0276	LID0092	24.0916	121.176	2064.98	GPS	plant	Rosales	Ulmaceae	Ulmus	leaf,twig,bark,soil,litter	5	HS,S,W	3	no	no	no	0
SPA0277	SPA0277	LID0092	24.0917	121.176	2065.89	GPS	plant				leaf,twig,bark,soil,litter	5	HS,S,W	3	no	no	no	0
SPA0278	SPA0278	LID0092	24.0916	121.176	2059.67	GPS	plant	Fagales	Juglandaceae	Juglans	leaf,twig,bark,soil,litter	5	HS,S,W	3	no	no	no	0
SPA0279	SPA0279	LID0092	24.0916	121.176	2063.97	GPS	plant	Rosales	Rosaceae	Eriobotrya	leaf,twig,litter	3	HS,S,W	3	no	no	no	0
SPA0280	SPA0280	LID0092	24.0918	121.176	2062.21	GPS	plant	Fagales	Juglandaceae	Juglans	leaf,twig,bark,soil,litter	5	HS,S,W	3	no	no	no	0
SPA0281	SPA0281	LID0092	24.0913	121.176	2053.63	GPS	plant	Fagales	Fagaceae	Quercus	leaf,twig,bark,soil,litter	5	HS,S,W	3	no	no	no	0
SPA0282	SPA0282	LID0092	24.0916	121.177	2037.37	GPS	plant	Ericales	Pentaphylacaceae	Adinandra	leaf,twig,bark,soil,litter	5	HS,S,W	3	no	no	no	0
SPA0283	SPA0283	LID0092	24.0915	121.177	2040.71	GPS	plant	Fagales	Fagaceae	Quercus	leaf,twig,bark,soil,litter	5	HS,S,W	3	no	no	no	0
SPA0284	SPA0284	LID0092	24.0915	121.177	2037.88	GPS	plant	Proteales	Sabiaceae	Meliosma	leaf,twig,bark,soil,litter	5	HS,S,W	3	no	no	no	0
SPA0285	SPA0285	LID0092	24.0916	121.177	2037.22	GPS	plant	Proteales	Sabiaceae	Meliosma	leaf,twig,bark,soil,litter	5	HS,S,W	3	no	no	no	0
SPA0286	SPA0286	LID0092	24.0913	121.177	2035.8	GPS	plant	Lamiales	Gesneriaceae	Hemiboea	leaf,twig,flower	3	HS,S,W	3	no	no	no	0
SPA0287	SPA0287	LID0092	24.0914	121.178	2028.64	GPS	plant	Proteales	Sabiaceae	Meliosma	leaf,twig,bark,soil,litter	5	HS,S,W	3	no	no	no	0
SPA0288	SPA0288	LID0092	24.0915	121.178	2031.02	GPS	plant	Laurales	Lauraceae	Machilus	leaf,twig,bark,soil,litter,rotten_bark	6	HS,S,W	3	no	no	no	0
SPA0289	SPA0289	LID0092	24.0913	121.177	2035.42	GPS	plant	Proteales	Sabiaceae	Meliosma	leaf,twig,bark,soil,litter	5	HS,S,W	3	no	no	no	0
SPA0290	SPA0290	LID0092	24.0912	121.177	2041.59	GPS	plant	Proteales	Sabiaceae	Meliosma	leaf,twig,bark,soil,litter	5	HS,S,W	3	no	no	no	0
SPA0291	SPA0291	LID0092	24.091	121.177	2045.29	GPS	plant	Fagales	Fagaceae	Quercus	leaf,twig,bark,soil,litter	5	HS,S,W	3	no	no	no	0
SPA0292	SPA0292	LID0092	24.0907	121.177	2036.01	GPS	plant	Rosales	Ulmaceae	Zelkova	leaf,twig,bark,soil,litter	5	HS,S,W	3	no	no	no	0
SPA0293	SPA0293	LID0092	24.0907	121.177	2042.63	GPS	plant	Ranunculales	Ranunculaceae	Clematis	leaf,flower	2	HS,S,W	3	no	no	no	0
SPA0294	SPA0294	LID0092	24.0904	121.176	2044.64	GPS	plant	Rosales	Rosaceae		leaf,twig,bark,soil,wood	5	HS,S,W	3	no	no	no	0
SPA0295	SPA0295	LID0110	24.4041	121.362	1570.86	GPS	plant	Magnoliales	Magnoliaceae	Magnolia	leaf,twig	2	HS,S,W	3	no	no	no	0
SPA0296	SPA0296	LID0110	24.4041	121.362	1572.45	GPS	plant				leaf,twig	2	HS,S,W	3	no	no	no	0
SPA0297	SPA0297	LID0110	24.4041	121.362	1572.52	GPS	plant	Fagales	Betulaceae	Alnus	leaf,twig	2	HS,S,W	3	no	no	no	0
SPA0298	SPA0298	LID0110	24.4043	121.362	1575.06	GPS	plant	Saxifragales	Iteaceae	Itea	leaf,twig,fruit	3	HS,S,W	3	no	no	yes	1	XI04	twig	1	S	1
SPA0299	SPA0299	LID0110	24.4043	121.362	1577.53	GPS	plant	Dipsacales	Adoxaceae	Viburnum	leaf,twig	2	HS,S,W	3	no	no	no	0
SPA0300	SPA0300	LID0110	24.4044	121.362	1579.17	GPS	plant	Rosales	Elaeagnaceae	Elaeagnus	leaf,twig	2	HS,S,W	3	no	no	no	0
SPA0301	SPA0301	LID0110	24.4044	121.362	1576.01	GPS	plant	Fagales	Fagaceae	Quercus	litter	1	HS,S,W	3	no	no	no	0
SPA0302	SPA0302	LID0110	24.4045	121.362	1575.55	GPS	plant	Rosales	Moraceae	Morus	leaf,twig	2	HS,S,W	3	no	no	no	0
SPA0303	SPA0303	LID0110	24.4047	121.362	1577.04	GPS	plant	Apiales	Araliaceae	Tetrapanax	leaf,flower	2	HS,S,W	3	no	no	no	0
SPA0304	SPA0304	LID0110	24.4047	121.363	1577.28	GPS	plant	Fagales	Fagaceae	Quercus	leaf,twig,litter,fallen_fruit	4	HS,S,W	3	no	no	no	0
SPA0305	SPA0305	LID0110	24.4046	121.363	1576.46	GPS	plant	Rosales	Ulmaceae	Ulmus	leaf,twig	2	HS,S,W	3	no	no	yes	1	XI06	leaf	1	S	1
SPA0306	SPA0306	LID0110	24.4047	121.363	1578.71	GPS	plant	Magnoliales	Magnoliaceae	Magnolia	leaf,twig	2	HS,S,W	3	no	no	no	0
SPA0307	SPA0307	LID0110	24.4046	121.363	1577.89	GPS	plant	Laurales	Lauraceae	Machilus	leaf,twig	2	HS,S,W	3	no	no	no	0
SPA0308	SPA0308	LID0110	24.4047	121.362	1579.55	GPS	plant	Dipsacales	Adoxaceae	Viburnum	leaf,twig,fruit	3	HS,S,W	3	no	no	no	0
SPA0309	SPA0309	LID0110	24.4047	121.362	1580.38	GPS	plant	Rosales	Moraceae	Morus	leaf,twig	2	HS,S,W	3	no	no	no	0
SPA0310	SPA0310	LID0110	24.4047	121.362	1577.91	GPS	plant	Fagales	Betulaceae	Alnus	leaf,twig,flower,fruit	4	HS,S,W	3	no	no	no	0
SPA0311	SPA0311	LID0110	24.4047	121.362	1578.03	GPS	plant	Rosales	Moraceae	Broussonetia	leaf,twig	2	HS,S,W	3	no	no	no	0
SPA0312	SPA0312	LID0110	24.4046	121.362	1576.13	GPS	plant	Rosales	Moraceae	Ficus	leaf,twig,fruit	3	HS,S,W	3	no	no	no	0
SPA0313	SPA0313	LID0110	24.4046	121.362	1574.4	GPS	plant	Fagales	Betulaceae	Alnus	leaf,twig,fruit,fallen_fruit	4	HS,S,W	3	no	no	no	0
SPA0314	SPA0314	LID0110	24.4045	121.362	1573.09	GPS	plant	Lamiales	Lamiaceae	Callicarpa	leaf,twig,fruit	3	HS,S,W	3	no	no	no	0
SPA0315	SPA0315	LID0110	24.4045	121.362	1572.62	GPS	plant	Sapindales	Sapindaceae	Acer	leaf,twig	2	HS,S,W	3	no	no	no	0
SPA0316	SPA0316	LID0110	24.4043	121.362	1571.79	GPS	plant	Laurales	Lauraceae	Machilus	leaf,twig	2	HS,S,W	3	no	no	no	0
SPA0317	SPA0317	LID0110	24.5974	121.513	335	GPS	plant	Sapindales	Sapindaceae	Acer	leaf,twig	2	HS,S,W	3	no	no	no	0
SPA0318	SPA0318	LID0110	24.4043	121.362	1570.18	GPS	plant	Fagales	Betulaceae	Alnus	leaf,twig,fruit	3	HS,S,W	3	no	no	no	0
SPA0319	SPA0319	LID0110	24.4036	121.361	1569.07	GPS	plant	Crossosomatales	Stachyuraceae	Stachyurus	leaf,twig,flower,fruit	4	HS,S,W	3	no	no	yes	1	XI07	twig	1	H	1
SPA0320	SPA0320	LID0110	24.4036	121.361	1566.71	GPS	plant	Ranunculales	Ranunculaceae	Clematis	leaf,twig,flower	3	HS,S,W	3	no	no	no	0
SPA0321	SPA0321	LID0110	24.4036	121.361	1567.13	GPS	plant	Ranunculales	Ranunculaceae	Clematis	leaf,twig,fruit	3	HS,S,W	3	no	no	no	0
SPA0322	SPA0322	LID0110	24.4035	121.361	1567.97	GPS	plant	Liliales	Liliaceae	Tricyrtis	leaf,flower	2	HS,S,W	3	no	no	no	0
SPA0323	SPA0323	LID0110	24.4035	121.361	1566.96	GPS	plant	Rosales	Rosaceae	Rubus	leaf,twig,fruit	3	HS,S,W	3	no	no	no	0
SPA0340	SPA0340	LID0110	24.4047	121.363	1509.2	GPS	plant	Laurales	Lauraceae	Litsea	leaf,twig,bark,soil,litter	5	HS,S,W	3	no	no	no	0
SPA0341	SPA0341	LID0110	24.4047	121.362	1527.6	GPS	plant	Fagales	Fagaceae	Quercus	leaf,twig,bark,soil,litter	5	HS,S,W	3	no	no	no	0
SPA0342	SPA0342	LID0110	24.4046	121.362	1548	GPS	plant	Fagales	Fagaceae	Lithocarpus	leaf,twig,bark,soil,litter,fallen_fruit	6	HS,S,W	3	yes	yes	yes	2	SPA0342,H342-1	leaf	1	H	1
SPA0343	SPA0343	LID0110	24.4045	121.362	1560.5	GPS	plant	Dipsacales	Adoxaceae	Viburnum	leaf,twig,bark,soil,litter	5	HS,S,W	3	no	no	no	0
SPA0344	SPA0344	LID0110	24.4046	121.362	1566.4	GPS	plant	Fagales	Fagaceae	Lithocarpus	leaf,twig,bark,soil,litter	5	HS,S,W	3	yes	yes	yes	2	SPA0344,H344-7	soil	1	H	1
SPA0345	SPA0345	LID0110	24.4046	121.362	1566.4	GPS	plant	Saxifragales	Iteaceae	Itea	leaf,twig,bark,soil,litter	5	HS,S,W	3	no	no	no	0
SPA0346	SPA0346	LID0110	24.4044	121.362	1572.4	GPS	plant	Rosales	Rosaceae	Eriobotrya	leaf,twig,bark,soil,litter	5	HS,S,W	3	yes	yes	yes	1	H346-1	leaf	1	H	1
SPA0347	SPA0347	LID0110	24.4043	121.362	1577.1	GPS	plant	Laurales	Lauraceae	Litsea	leaf,twig,bark,soil,litter	5	HS,S,W	3	yes	no	yes	1	H347-8	litter	1	H	1
SPA0348	SPA0348	LID0110	24.4042	121.362	1582.2	GPS	plant	Fagales	Fagaceae	Quercus	leaf,twig,bark,soil,litter	5	HS,S,W	3	yes	yes	yes	2	SPA0348,H348-7	soil,litter	2	H	1
SPA0349	SPA0349	LID0110	24.4043	121.362	1587.8	GPS	plant	Laurales	Lauraceae	Machilus	leaf,twig,bark,soil	4	HS,S,W	3	no	no	no	0
SPA0350	SPA0350	LID0110	24.4042	121.362	1588.8	GPS	plant	Laurales	Lauraceae	Machilus	leaf,twig,soil,litter	4	HS,S,W	3	no	no	no	0
SPA0351	SPA0351	LID0110	24.4042	121.362	1589.2	GPS	plant	Ericales	Pentaphylacaceae	Eurya	leaf,twig,bark,soil,litter	5	HS,S,W	3	no	no	no	0
SPA0352	SPA0352	LID0110	24.4042	121.363	1588.8	GPS	plant	Ericales	Symplocaceae	Symplocos	leaf,twig,bark,soil,litter	5	HS,S,W	3	yes	no	yes	1	H352-8	litter	1	H	1
SPA0353	SPA0353	LID0110	24.4041	121.363	1590	GPS	plant	Fagales	Fagaceae	Quercus	leaf,twig,bark,soil,litter	5	HS,S,W	3	no	no	no	0
SPA0354	SPA0354	LID0110	24.4041	121.362	1589.7	GPS	plant	Apiales	Araliaceae	Fatsia	leaf,bark,soil,petiole	4	HS,S,W	3	no	no	yes	1	SPA0354	petiole	1	H	1
SPA0355	SPA0355	LID0110	24.4041	121.363	1589.1	GPS	plant	Fagales	Fagaceae	Lithocarpus	leaf,twig,bark,soil,litter	5	HS,S,W	3	no	no	no	0
SPA0356	SPA0356	LID0110	24.4041	121.363	1590.4	GPS	plant	Apiales	Araliaceae	Fatsia	leaf,bark,soil,litter,petiole	5	HS,S,W	3	yes	yes	yes	1	SPA0356	soil	1	S	1
SPA0357	SPA0357	LID0110	24.4041	121.363	1590.4	GPS	plant	Rosales	Cannabaceae	Celtis	leaf,twig,bark,soil,litter	5	HS,S,W	3	yes	yes	no	0
SPA0358	SPA0358	LID0110	24.4042	121.363	1590.1	GPS	plant	Ericales	Symplocaceae	Symplocos	leaf,twig,bark,soil,litter	5	HS,S,W	3	yes	yes	no	0
SPA0359	SPA0359	LID0110	24.4041	121.363	1592	GPS	plant	Laurales	Lauraceae	Litsea	leaf,twig,bark,soil,litter	5	HS,S,W	3	yes	yes	yes	2	SPA0359,H359-1	twig,leaf	2	S,H	2
SPA0360	SPA0360	LID0111	24.3912	121.353	1868.9	GPS	plant	Rosales	Rosaceae	Photinia	leaf,twig,bark,fruit,litter	5	HS,S,W	3	no	no	no	0
SPA0361	SPA0361	LID0111	24.3907	121.353	1876.6	GPS	plant	Lamiales	Oleaceae	Ligustrum	leaf,twig,soil	3	HS,S,W	3	no	no	no	0
SPA0362	SPA0362	LID0111	24.3903	121.353	1888.3	GPS	plant	Apiales	Araliaceae	Fatsia	leaf,bark,flower,fruit,soil,petiole	6	HS,S,W	3	no	no	no	0
SPA0363	SPA0363	LID0111	24.3899	121.353	1904.5	GPS	plant	Crossosomatales	Stachyuraceae	Stachyurus	leaf,twig,bark,flower,litter	5	HS,S,W	3	no	no	no	0
SPA0364	SPA0364	LID0111	24.3896	121.353	1913.2	GPS	plant	Laurales	Lauraceae	Actinodaphne	leaf,twig,bark,soil,litter	5	HS,S,W	3	no	no	no	0
SPA0365	SPA0365	LID0111	24.3898	121.354	1917.2	GPS	plant	Poales	Poaceae	Yushania	leaf,twig,soil,litter	4	HS,S,W	3	no	no	no	0
SPA0366	SPA0366	LID0111	24.3895	121.354	1928.1	GPS	plant	Fagales	Fagaceae	Quercus	leaf,twig,bark,soil,litter	5	HS,S,W	3	no	no	yes	1	SPA0366	soil	1	S	1
SPA0367	SPA0367	LID0111	24.3889	121.354	1955.4	GPS	plant	Fagales	Betulaceae	Alnus	leaf,twig,bark,soil,litter	5	HS,S,W	3	no	no	no	0
SPA0368	SPA0368	LID0111	24.3886	121.355	1959.2	GPS	plant	Brassicales	Caprifoliaceae	Lonicera	leaf,twig,soil,litter	4	HS,S,W	3	no	no	no	0
SPA0369	SPA0369	LID0111	24.3884	121.356	1962.3	GPS	plant	Crossosomatales	Stachyuraceae	Stachyurus	leaf,twig,bark,soil,litter	5	HS,S,W	3	no	no	no	0
SPA0370	SPA0370	LID0111	24.3883	121.356	1968.7	GPS	plant	Rosales	Urticaceae	Debregeasia	leaf,twig,bark,litter	4	HS,S,W	3	no	no	no	0
SPA0371	SPA0371	LID0111	24.3875	121.357	1975	GPS	plant	Trochodendrales	Trochodendraceae	Trochodendron	leaf,twig,bark,soil,litter	5	HS,S,W	3	no	no	no	0
SPA0372	SPA0372	LID0111	24.3873	121.357	1975.6	GPS	plant	Dipsacales	Adoxaceae	Viburnum	leaf,twig,soil,litter	4	HS,S,W	3	no	no	no	0
SPA0373	SPA0373	LID0111	24.3874	121.358	1982.1	GPS	plant	Lamiales	Oleaceae	Ligustrum	leaf,twig,bark,soil,litter	5	HS,S,W	3	no	no	no	0
SPA0374	SPA0374	LID0111	24.3874	121.358	1987.2	GPS	plant	Polypodiales	Blechnaceae	Woodwardia	leaf,soil,litter,vein	4	HS,S,W	3	no	no	no	0
SPA0375	SPA0375	LID0111	24.387	121.358	2000.8	GPS	plant	Fagales	Fagaceae	Quercus	leaf,twig,litter	3	HS,S,W	3	no	no	no	0
SPA0376	SPA0376	LID0111	24.3868	121.358	2009.3	GPS	plant	Trochodendrales	Trochodendraceae	Trochodendron	leaf,twig,soil,litter	4	HS,S,W	3	no	no	no	0
SPA0377	SPA0377	LID0111	24.3869	121.357	2014.2	GPS	plant	Apiales	Araliaceae	Fatsia	leaf,bark,soil,litter,petiole	5	HS,S,W	3	no	no	no	0
SPA0378	SPA0378	LID0111	24.3869	121.356	2017.8	GPS	plant	Lamiales	Lamiaceae	Callicarpa	leaf,twig,bark,soil,litter	5	HS,S,W	3	no	no	no	0
SPA0379	SPA0379	LID0111	24.387	121.356	2022.7	GPS	plant	Dipsacales	Adoxaceae	Viburnum	leaf,twig,soil,litter	4	HS,S,W	3	no	no	no	0
SPA0380	SPA0380	LID0111	24.3866	121.355	2026.9	GPS	plant	Rosales	Rosaceae	Rubus	leaf,twig,litter	3	HS,S,W	3	no	no	no	0
SPA0381	SPA0381	LID0111	24.3863	121.355	2036.1	GPS	plant	Pinales	Cupressaceae	Chamaecyparis	leaf,twig,soil	3	HS,S,W	3	no	no	no	0
SPA0382	SPA0382	LID0111	24.3866	121.355	2040.3	GPS	plant	Pinales	Pinaceae	Pinus	leaf,twig,litter	3	HS,S,W	3	no	no	no	0
SPA0383	SPA0383	LID0546	24.4842	121.441	1257.5	GPS	plant	Malpighiales	Euphorbiaceae	Mallotus	twig,bark,litter	3	HS,S,W	3	no	no	no	0
SPA0384	SPA0384	LID0546	24.4845	121.441	1268.8	GPS	plant	Rosales	Moraceae	Ficus	leaf,twig,bark,soil,litter	5	HS,S,W	3	no	no	no	0
SPA0385	SPA0385	LID0546	24.4849	121.442	1276.9	GPS	plant	Rosales	Urticaceae	Debregeasia	leaf,twig,litter	3	HS,S,W	3	no	no	no	0
SPA0386	SPA0386	LID0546	24.4856	121.442	1291.7	GPS	plant	Crossosomatales	Staphyleaceae	Turpinia	leaf,twig,litter	3	HS,S,W	3	no	no	no	0
SPA0387	SPA0387	LID0546	24.4862	121.442	1309.3	GPS	plant	Fabales	Fabaceae	Bauhinia	leaf,twig,litter	3	HS,S,W	3	no	no	no	0
SPA0388	SPA0388	LID0546	24.4866	121.442	1324.3	GPS	plant	Rosales	Urticaceae	Oreocnide	leaf,twig,bark,soil,litter	5	HS,S,W	3	no	no	no	0
SPA0389	SPA0389	LID0546	24.4869	121.443	1333.7	GPS	plant	Pinales	Cupressaceae	Cunninghamia	leaf,twig,bark,soil,litter	5	HS,S,W	3	no	no	no	0
SPA0390	SPA0390	LID0546	24.4871	121.443	1343.3	GPS	plant	Fagales	Fagaceae	Quercus	leaf,twig,soil,litter	4	HS,S,W	3	no	no	no	0
SPA0391	SPA0391	LID0546	24.4873	121.443	1354	GPS	plant	Pinales	Cupressaceae	Chamaecyparis	leaf,twig,bark,soil,litter	5	HS,S,W	3	no	no	no	0
SPA0392	SPA0392	LID0546	24.4876	121.444	1365.9	GPS	plant	Pinales	Cupressaceae	Calocedrus	leaf,twig	2	HS,S,W	3	no	no	no	0
SPA0393	SPA0393	LID0546	24.4876	121.444	1376.9	GPS	plant	Pinales	Cupressaceae	Chamaecyparis	leaf,twig,bark,soil,litter	5	HS,S,W	3	no	no	no	0
SPA0394	SPA0394	LID0546	24.4879	121.445	1385.9	GPS	plant	Pinales	Cupressaceae	Taiwania	leaf,twig,bark,soil,litter	5	HS,S,W	3	no	no	no	0
SPA0395	SPA0395	LID0546	24.4883	121.445	1395.4	GPS	plant	Gentianales	Rubiaceae	Damnacanthus	leaf,twig	2	HS,S,W	3	no	no	no	0
SPA0396	SPA0396	LID0546	24.4883	121.446	1408.3	GPS	plant	Pinales	Cupressaceae	Taiwania	leaf,twig,bark,soil,litter	5	HS,S,W	3	no	no	no	0
SPA0397	SPA0397	LID0546	24.4884	121.446	1412.3	GPS	plant	Rosales	Moraceae	Ficus	leaf,twig	2	HS,S,W	3	no	no	no	0
SPA0398	SPA0398	LID0546	24.4884	121.433	980.2	GPS	plant	Rosales	Moraceae	Ficus	leaf,twig,litter	3	HS,S,W	3	no	no	no	0
SPA0399	SPA0399	LID0546	24.4879	121.433	984.3	GPS	plant	Zingiberales	Musaceae	Musa	leaf,soil,litter	3	HS,S,W	3	no	no	no	0
SPA0400	SPA0400	LID0546	24.4875	121.434	989.2	GPS	plant	Alismatales	Araceae	Alocasia	leaf,soil,petiole	3	HS,S,W	3	no	no	no	0
SPA0401	SPA0401	LID0546	24.4871	121.434	996.6	GPS	plant	Rosales	Moraceae	Ficus	leaf,twig,fruit,litter	4	HS,S,W	3	no	no	no	0
SPA0402	SPA0402	LID0546	24.4869	121.434	1007.5	GPS	plant	Rosales	Moraceae	Morus	leaf,twig,litter	3	HS,S,W	3	no	no	no	0
SPA0403	SPA0403	LID0546	24.4868	121.435	1014.1	GPS	plant	Rosales	Rosaceae	Rubus	leaf,twig,litter	3	HS,S,W	3	no	no	no	0
SPA0404	SPA0404	LID0546	24.4865	121.435	1021.7	GPS	plant	Polypodiales	Athyriaceae	Diplazium	leaf,litter	2	HS,S,W	3	no	no	no	0
SPA0405	SPA0405	LID0546	24.4868	121.436	1036.8	GPS	plant	Rosales	Urticaceae	Oreocnide	leaf,twig	2	HS,S,W	3	no	no	no	0
SPA0406	SPA0406	LID0546	24.4872	121.436	1049.6	GPS	plant	Poales	Poaceae	Phyllostachys	leaf,twig,soil,litter	4	HS,S,W	3	no	no	no	0
SPA0407	SPA0407	LID0546	24.4877	121.436	1060.6	GPS	plant	Zingiberales	Zingiberaceae	Alpinia	leaf	1	HS,S,W	3	no	no	no	0
SPA0408	SPA0408		24.4042	121.363	1603.68	GPS	plant	Laurales	Lauraceae	Litsea	leaf,twig,bark,soil,litter	5	HS,S	2	no	yes	no	0
SPA0409	SPA0409		24.4042	121.363	1601.9	GPS	plant	Fagales	Fagaceae	Lithocarpus	leaf,twig,bark,soil,litter	5	HS,S	2	no	no	yes	1	H409-8	litter	1	H	1
SPA0410	SPA0410		24.4042	121.363	1603.05	GPS	plant	Lamiales	Lamiaceae	Callicarpa	leaf,twig,bark,soil,litter	5	HS,S	2	no	no	no	0
SPA0411	SPA0411		24.4041	121.363	1601.46	GPS	plant	Laurales	Lauraceae	Litsea	leaf,twig,bark,soil,litter	5	HS,S	2	no	yes	yes	1	H411-8	litter	1	H	1
SPA0412	SPA0412		24.404	121.363	1603.77	GPS	plant	Cornales	Hydrangeaceae	Hydrangea	leaf,twig,bark,soil,litter	5	HS,S	2	no	no	yes	1	H412-8	litter	1	H	1
SPA0413	SPA0413		24.404	121.363	1604.17	GPS	plant	Apiales	Araliaceae	Fatsia	leaf,bark,soil,litter,petiole	5	HS,S	2	no	yes	yes	1	H413-8	litter	1	H	1
SPA0414	SPA0414		24.404	121.363	1604.86	GPS	plant	Fagales	Fagaceae	Lithocarpus	leaf,twig,bark,soil,litter	5	HS,S	2	no	yes	yes	1	H414-8	litter	1	H	1
SPA0415	SPA0415		24.404	121.363	1608.52	GPS	plant	Laurales	Lauraceae	Litsea	leaf,twig,bark,soil,litter	5	HS,S	2	no	yes	yes	1	H415-8	litter	1	H	1
SPA0416	SPA0416		24.4039	121.363	1609.26	GPS	plant	Laurales	Lauraceae	Actinodaphne	leaf,twig,bark,soil,litter	5	HS,S	2	no	yes	yes	1	H416-8	litter	1	H	1
SPA0417	SPA0417		24.404	121.363	1611.61	GPS	plant	Dipsacales	Adoxaceae	Viburnum	leaf,twig,bark,soil,litter	5	HS,S	2	no	yes	no	0
SPA0418	SPA0418		24.404	121.363	1614.07	GPS	plant	Laurales	Lauraceae	Machilus	leaf,twig,bark,soil,litter	5	HS,S	2	no	yes	yes	1	H418-7	soil	1	H	1
SPA0419	SPA0419		24.4039	121.363	1614.44	GPS	plant	Apiales	Araliaceae	Fatsia	leaf,bark,litter,petiole	4	HS,S	2	no	yes	no	0
SPA0420	SPA0420		24.4039	121.363	1615.74	GPS	plant	Laurales	Lauraceae	Machilus	leaf,twig,bark,soil,litter	5	HS,S	2	no	yes	yes	1	H420-8	litter	1	H	1
LY0001	LY001		24.0895	121.174	2130	GPS	symbiosis	Peltigera	Peltigerales	Peltigeraceae	lichen	1	HS,S,W	3	no	no	no	0
LY0002	LY001		24.0895	121.174	2130	GPS	symbiosis	Crocodia			lichen	1	HS,S,W	3	no	no	no	0
LY0003	LY001		24.0895	121.174	2130	GPS	symbiosis	Parmelia	lecanorales	Parmeliaceae	lichen	1	HS,S,W	3	no	no	no	0
LY0004	LY001		24.0895	121.174	2130	GPS	symbiosis	Punctelia	Lecanorales	Parmeliaceae	lichen	1	HS,S,W	3	no	no	no	0
LY0005	LY001		24.0895	121.174	2130	GPS	symbiosis	Punctelia	Lecanorales	Parmeliaceae	lichen	1	HS,S,W	3	no	no	no	0
LY0006	LY001		24.0895	121.174	2130	GPS	symbiosis	Sticta	Peltigerales	Lobariaceae	lichen	1	HS,S,W	3	no	no	no	0
LY0007	LY001		24.0895	121.174	2130	GPS	symbiosis	Leptogium	Peltigerales	Collemataceae	lichen	1	HS,S,W	3	no	no	no	0
LY0008	LY001		24.0895	121.174	2130	GPS	symbiosis	Leptogium	Peltigerales	Collemataceae	lichen	1	HS,S,W	3	no	no	no	0
LY0009	LY001		24.0895	121.174	2130	GPS	symbiosis	Coenogonium	Ostropales	Coenogoniaceae	lichen	1	HS,S,W	3	no	no	no	0
LY0010	LY001		24.0895	121.174	2130	GPS	symbiosis	Usnea	Lecanorales	Parmeliaceae	lichen	1	HS,S,W	3	no	no	no	0
LY0011	LY001		24.0895	121.174	2130	GPS	symbiosis	Lobaria	Peltigerales	Lobariaceae	lichen	1	HS,S,W	3	no	no	no	0
LY0012	LY001		24.0895	121.174	2130	GPS	symbiosis	Malmidea	Lecanorales	Malmideaceae	lichen	1	HS,S,W	3	no	no	no	0
LY0013	LY001		24.0895	121.174	2130	GPS	symbiosis	Sticta	Peltigerales	Lobariaceae	lichen	1	HS,S,W	3	no	no	no	0
LY0014	LY001		24.0895	121.174	2130	GPS	symbiosis	Coenogonium	Ostropales	Coenogoniaceae	lichen	1	HS,S,W	3	no	no	no	0
LY0015	LY001		24.0895	121.174	2130	GPS	symbiosis	Leucodermia			lichen	1	HS,S,W	3	no	no	no	0
LY0016	LY001		24.0895	121.174	2130	GPS	symbiosis	Normandina	Verrucariales	Verrucariaceae	lichen	1	HS,S,W	3	no	no	no	0
LY0017	LY002		24.2018	121.322	2450	GPS	symbiosis	Leptogium	Peltigerales	Collemataceae	lichen	1	HS,S,W	3	no	no	no	0
LY0018	LY002		24.2018	121.322	2450	GPS	symbiosis	Ochrolechia	Lecanorales	Lecanorineae	lichen	1	HS,S,W	3	no	no	no	0
LY0019	LY001		24.0895	121.174	2130	GPS	symbiosis	Dendristcosticta			lichen	1	HS,S,W	3	no	no	no	0
LY0020	LY001		24.0895	121.174	2130	GPS	symbiosis	Heterodermia	Teloschistales	Physciaceae	lichen	1	HS,S,W	3	no	no	no	0
LY0021	LY001		24.0895	121.174	2130	GPS	symbiosis	Lobaria	Peltigerales	Lobariaceae	lichen	1	HS,S,W	3	no	no	no	0
LY0022	LY001		24.0895	121.174	2130	GPS	symbiosis	Heterodermia	Teloschistales	Physciaceae	lichen	1	HS,S,W	3	no	no	no	0
LY0023	LY001		24.0895	121.174	2130	GPS	symbiosis	Chrysothrix	Arthoniales	Chrysothricaceae	lichen	1	HS,S,W	3	no	no	no	0
LY0024	LY001		24.0895	121.174	2130	GPS	symbiosis	Lecanora	Lecanorales	Lecanoraceae	lichen	1	HS,S,W	3	no	no	no	0
LY0025	LY003		24.2018	121.322	3040	GPS	symbiosis	Nephroma	Peltigerales	Nephromataceae	lichen	1	HS,S,W	3	no	no	no	0
LY0026	LY003		24.2018	121.322	3040	GPS	symbiosis	Parmelia	lecanorales	Parmeliaceae	lichen	1	HS,S,W	3	no	no	no	0
LY0027	LY003		24.2018	121.322	3040	GPS	symbiosis	Hypotrachina	Lecanorales	Parmeliaceae	lichen	1	HS,S,W	3	no	no	no	0
LY0028	LY003		24.2018	121.322	3040	GPS	symbiosis	Hypogymia	Lecanorales	Parmeliaceae	lichen	1	HS,S,W	3	no	no	no	0
LY0029	LY003		24.2018	121.322	3040	GPS	symbiosis	Menegazzia	Megalosporaceae	Megalosporaceae	lichen	1	HS,S,W	3	no	no	no	0
LY0030	LY003		24.2018	121.322	3040	GPS	symbiosis	Lobaria	Peltigerales	Lobariaceae	lichen	1	HS,S,W	3	no	no	no	0
LY0031	LY003		24.2018	121.322	3040	GPS	symbiosis	Sulcaria	Lecanorales	Parmeliaceae	lichen	1	HS,S,W	3	no	no	no	0
LY0032	LY003		24.2018	121.322	3040	GPS	symbiosis	Sulcaria	Lecanorales	Parmeliaceae	lichen	1	HS,S,W	3	no	no	no	0
LY0033	LY005		24.158	121.286	3053	GPS	symbiosis	Pertusaria	Pertusariales	Pertusariaceae	lichen	1	HS,S,W	3	no	no	no	0
LY0034	LY003		24.2018	121.322	3040	GPS	symbiosis	Lobariella	Peltigerales	Lobariaceae	lichen	1	HS,S,W	3	no	no	no	0
LY0035	LY003		24.2018	121.322	3040	GPS	symbiosis	Podostictina	Peltigerales	Lobariaceae	lichen	1	HS,S,W	3	no	no	no	0
LY0036	LY006		23.961	120.972	442	dem_20m_raw	symbiosis	Lepraria	Lecanorales	Stereocaulaceae	lichen	1	HS,S,W	3	no	no	no	0
LY0037	LY004		24.1224	121.272	3090	GPS	symbiosis	Cladonia	Lecanorales	Cladoniaceae	lichen	1	HS,S,W	3	no	no	no	0
LY0038	LY002		24.2018	121.322	2450	GPS	symbiosis	Hypotrachyna	Lecanorales	Parmeliaceae	lichen	1	HS,S,W	3	no	no	no	0
LY0039	LY002		24.2018	121.322	2450	GPS	symbiosis	Hypotrachyna	Lecanorales	Parmeliaceae	lichen	1	HS,S,W	3	no	no	no	0
LY0040	LY005		24.158	121.286	3053	GPS	symbiosis				lichen	1	HS,S,W	3	no	no	no	0
LY0041	LY005		24.158	121.286	3053	GPS	symbiosis				lichen	1	HS,S,W	3	no	no	no	0
LY0042	LY003		24.2018	121.322	3040	GPS	symbiosis	Podostictina	Peltigerales	Lobariaceae	lichen	1	HS,S,W	3	no	no	no	0
LY0043	LY005		24.158	121.286	3053	GPS	symbiosis	Pertusaria	Pertusariales	Pertusariaceae	lichen	1	HS,S,W	3	no	no	no	0
LY0044	LY005		24.158	121.286	3053	GPS	symbiosis	Sphaerophorus	Lecanorales	Sphaerophoraceae	lichen	1	HS,S,W	3	no	no	no	0
LY0045	LY005		24.158	121.286	3053	GPS	symbiosis	Parmelia	lecanorales	Parmeliaceae	lichen	1	HS,S,W	3	no	no	no	0
LY0046	LY005		24.158	121.286	3053	GPS	symbiosis	Bryoria	Lecanorales	Parmeliaceae	lichen	1	HS,S,W	3	no	no	no	0
LY0047	LY005		24.158	121.286	3053	GPS	symbiosis	Lobariella	Peltigerales	Lobariaceae	lichen	1	HS,S,W	3	no	no	no	0
LY0048	LY005		24.158	121.286	3053	GPS	symbiosis	Parmotrema	lecanorales	Parmeliaceae	lichen	1	HS,S,W	3	no	no	no	0
LY0049	LY002		24.2018	121.322	2450	GPS	symbiosis	Lobaria	Peltigerales	Lobariaceae	lichen	1	HS,S,W	3	no	no	no	0
LY0050	LY002		24.2018	121.322	2450	GPS	symbiosis	Lobaria	Peltigerales	Lobariaceae	lichen	1	HS,S,W	3	no	no	no	0
LY0051	LY002		24.2018	121.322	2450	GPS	symbiosis	Lobaria	Peltigerales	Lobariaceae	lichen	1	HS,S,W	3	no	no	no	0
LY0052	LY005		24.158	121.286	3053	GPS	symbiosis				lichen	1	HS,S,W	3	no	no	no	0
LY0053	LY005		24.158	121.286	3053	GPS	symbiosis	Sphaerophorus	Lecanorales	Sphaerophoraceae	lichen	1	HS,S,W	3	no	no	no	0
LY0054	LY005		24.158	121.286	3053	GPS	symbiosis	Fuscopannaria	Lecanorales	Parmeliaceae	lichen	1	HS,S,W	3	no	no	no	0
LY0055	LY005		24.158	121.286	3053	GPS	symbiosis	Pertusaria	Pertusariales	Pertusariaceae	lichen	1	HS,S,W	3	no	no	no	0
LY0056	LY005		24.158	121.286	3053	GPS	symbiosis	Pertusaria	Pertusariales	Pertusariaceae	lichen	1	HS,S,W	3	no	no	no	0
LY0057	LY005		24.158	121.286	3053	GPS	symbiosis	Ochrolechia	Lecanorales	Lecanorineae	lichen	1	HS,S,W	3	no	no	no	0
LY0058	LY005		24.158	121.286	3053	GPS	symbiosis	Ochrolechia	Lecanorales	Lecanorineae	lichen	1	HS,S,W	3	no	no	no	0
LY0059	LY002		24.2018	121.322	2450	GPS	symbiosis	Sticta	Peltigerales	Lobariaceae	lichen	1	HS,S,W	3	no	no	no	0
LY0060	LY002		24.2018	121.322	2450	GPS	symbiosis	Podostictina	Peltigerales	Lobariaceae	lichen	1	HS,S,W	3	no	no	no	0
LY0061	LY002		24.2018	121.322	2450	GPS	symbiosis	Pseudocyphellaria	Peltigerales	Lobariaceae	lichen	1	HS,S,W	3	no	no	no	0
LY0062	LY002		24.2018	121.322	2450	GPS	symbiosis	Nephroma	Peltigerales	Nephromataceae	lichen	1	HS,S,W	3	no	no	no	0
LY0063	LY002		24.2018	121.322	2450	GPS	symbiosis	Leptogium	Peltigerales	Collemataceae	lichen	1	HS,S,W	3	no	no	no	0
LY0064	LY002		24.2018	121.322	2450	GPS	symbiosis	Pseudocyphellaria	Peltigerales	Lobariaceae	lichen	1	HS,S,W	3	no	no	no	0
LY0065	LY002		24.2018	121.322	2450	GPS	symbiosis	Hypogymnia	Lecanorales	Parmeliaceae	lichen	1	HS,S,W	3	no	no	no	0
LY0066	LY006		23.961	120.972	442	dem_20m_raw	symbiosis	Lobaria	Peltigerales	Lobariaceae	lichen	1	HS,S,W	3	no	no	no	0
LY0067	LY006		23.961	120.972	442	dem_20m_raw	symbiosis	Podostictina	Peltigerales	Lobariaceae	lichen	1	HS,S,W	3	no	no	no	0
LY0068	LY006		23.961	120.972	442	dem_20m_raw	symbiosis	Coenogonium	Ostropales	Coenogoniaceae	lichen	1	HS,S,W	3	no	no	no	0
LY0069	LY004		24.1224	121.272	3090	GPS	symbiosis	Cladia	Lecanorales	Cladoniaceae	lichen	1	HS,S,W	3	no	no	no	0
LY0070	LY005		24.158	121.286	3053	GPS	symbiosis	Lobaria	Peltigerales	Lobariaceae	lichen	1	HS,S,W	3	no	no	no	0
LY0071	LY001		24.0895	121.174	2130	GPS	symbiosis	Punctelia	Lecanorales	Parmeliaceae	lichen	1	HS,S,W	3	no	no	no	0
LY0072	LY001		24.0895	121.174	2130	GPS	symbiosis	Flavoparmelia	Lecanorales	Parmeliaceae	lichen	1	HS,S,W	3	no	no	no	0
LY0073	LY001		24.0895	121.174	2130	GPS	symbiosis	Malmidea	Lecanorales	Malmideaceae	lichen	1	HS,S,W	3	no	no	no	0
LY0074	LY001		24.0895	121.174	2130	GPS	symbiosis	Cetrelia	Lecanorales	Parmeliaceae	lichen	1	HS,S,W	3	no	no	no	0
LY0075	LY001		24.0895	121.174	2130	GPS	symbiosis				lichen	1	HS,S,W	3	no	no	no	0
LY0076	LY001		24.0895	121.174	2130	GPS	symbiosis	Heterodermia	Teloschistales	Physciaceae	lichen	1	HS,S,W	3	no	no	no	0
LY0077	LY001		24.0895	121.174	2130	GPS	symbiosis	Malmidea	Lecanorales	Malmideaceae	lichen	1	HS,S,W	3	no	no	no	0
LY0078	LY001		24.0895	121.174	2130	GPS	symbiosis	Porina	Ostropales	Porinaceae	lichen	1	HS,S,W	3	no	no	no	0
LY0079	LY001		24.0895	121.174	2130	GPS	symbiosis	Coenogonium	Ostropales	Coenogoniaceae	lichen	1	HS,S,W	3	no	no	no	0
LY0080	LY001		24.0895	121.174	2130	GPS	symbiosis	Chrysothrix	Arthoniales	Chrysothricaceae	lichen	1	HS,S,W	3	no	no	no	0
LY0081	LY001		24.0895	121.174	2130	GPS	symbiosis	Pyrrhospora	Lecanorales	Lecanoraceae	lichen	1	HS,S,W	3	no	no	no	0
LY0082	LY001		24.0895	121.174	2130	GPS	symbiosis	Haematomma	Lecanorales	Haematommataceae	lichen	1	HS,S,W	3	no	no	no	0
LY0083	LY001		24.0895	121.174	2130	GPS	symbiosis	Lecanora	Lecanorales	Lecanoraceae	lichen	1	HS,S,W	3	no	no	no	0
LY0084	LY001		24.0895	121.174	2130	GPS	symbiosis	Lecanora	Lecanorales	Lecanoraceae	lichen	1	HS,S,W	3	no	no	no	0
LY0085	LY001		24.0895	121.174	2130	GPS	symbiosis	Heterodermia	Teloschistales	Physciaceae	lichen	1	HS,S,W	3	no	no	no	0
LY0086	LY001		24.0895	121.174	2130	GPS	symbiosis	Pyxine	Caliciales	Caliciaceae	lichen	1	HS,S,W	3	no	no	no	0
LY0087	LY001		24.0895	121.174	2130	GPS	symbiosis	Myelochroa	Lecanorales	Parmeliaceae	lichen	1	HS,S,W	3	no	no	no	0
LY0088	LY001		24.0895	121.174	2130	GPS	symbiosis	Phaeophyscia	Teloschistales	Physciaceae	lichen	1	HS,S,W	3	no	no	no	0
LY0089	LY001		24.0895	121.174	2130	GPS	symbiosis	Heterodermia	Teloschistales	Physciaceae	lichen	1	HS,S,W	3	no	no	no	0
LY0090	LY001		24.0895	121.174	2130	GPS	symbiosis	Heterodermia	Teloschistales	Physciaceae	lichen	1	HS,S,W	3	no	no	no	0
LY0091	LY004		24.1224	121.272	3090	GPS	symbiosis	Sulcaria	Lecanorales	Parmeliaceae	lichen	1	HS,S,W	3	no	no	no	0
LY0092	LY004		24.1224	121.272	3090	GPS	symbiosis	Pilophorus	Lecanorales	Cladoniaceae	lichen	1	HS,S,W	3	no	no	no	0
LY0093	LY004		24.1224	121.272	3090	GPS	symbiosis	Pilophorus	Lecanorales	Cladoniaceae	lichen	1	HS,S,W	3	no	no	no	0
LY0094	LY004		24.1224	121.272	3090	GPS	symbiosis	Cladonia	Lecanorales	Cladoniaceae	lichen	1	HS,S,W	3	no	no	no	0
LY0095	LY001		24.0895	121.174	2130	GPS	symbiosis	Leucodermia			lichen	1	HS,S,W	3	no	no	no	0
LY0096	LY004		24.1224	121.272	3090	GPS	symbiosis	Parmelia	lecanorales	Parmeliaceae	lichen	1	HS,S,W	3	no	no	no	0
LY0097	LY004		24.1224	121.272	3090	GPS	symbiosis	Cladia	Lecanorales	Cladoniaceae	lichen	1	HS,S,W	3	no	no	no	0
LY0098	LY004		24.1224	121.272	3090	GPS	symbiosis	Parmelia	lecanorales	Parmeliaceae	lichen	1	HS,S,W	3	no	no	no	0
LY0099	LY004		24.1224	121.272	3090	GPS	symbiosis	Cladia	Lecanorales	Cladoniaceae	lichen	1	HS,S,W	3	no	no	no	0
LY0100	LY004		24.1224	121.272	3090	GPS	symbiosis	Rhizocarpon	Rhizocarpales	Rhizocarpaceae	lichen	1	HS,S,W	3	no	no	no	0
LY0101	LY004		24.1224	121.272	3090	GPS	symbiosis	Hypogymnia	Lecanorales	Parmeliaceae	lichen	1	HS,S,W	3	no	no	no	0
LY0102	LY004		24.1224	121.272	3090	GPS	symbiosis	Cladia	Lecanorales	Cladoniaceae	lichen	1	HS,S,W	3	no	no	no	0
LY0103	LY004		24.1224	121.272	3090	GPS	symbiosis	Cladia	Lecanorales	Cladoniaceae	lichen	1	HS,S,W	3	no	no	no	0
LY0104	LY004		24.1224	121.272	3090	GPS	symbiosis	Cladonia	Lecanorales	Cladoniaceae	lichen	1	HS,S,W	3	no	no	no	0
LY0105	LY004		24.1224	121.272	3090	GPS	symbiosis	Cladia	Lecanorales	Cladoniaceae	lichen	1	HS,S,W	3	no	no	no	0
LY0106	LY002		24.2018	121.322	2450	GPS	symbiosis	Lobaria	Peltigerales	Lobariaceae	lichen	1	HS,S,W	3	no	no	no	0
LY0107	LY004		24.1224	121.272	3090	GPS	symbiosis	Cladia	Lecanorales	Cladoniaceae	lichen	1	HS,S,W	3	no	no	no	0
LY0108	LY004		24.1224	121.272	3090	GPS	symbiosis	Lecanora	Lecanorales	Lecanoraceae	lichen	1	HS,S,W	3	no	no	no	0
LY0109	LY005		24.158	121.286	3053	GPS	symbiosis	Fuscopannaria	Lecanorales	Parmeliaceae	lichen	1	HS,S,W	3	no	no	no	0
LY0110	LY005		24.158	121.286	3053	GPS	symbiosis	Lobariella	Peltigerales	Lobariaceae	lichen	1	HS,S,W	3	no	no	no	0
LY0111	LY005		24.158	121.286	3053	GPS	symbiosis	Megalospora	Megalosporaceae	Megalosporaceae	lichen	1	HS,S,W	3	no	no	no	0
LY0112	LY003		24.2018	121.322	3040	GPS	symbiosis	Platimatia	Lecanorales	Parmeliaceae	lichen	1	HS,S,W	3	no	no	no	0
LY0113	LY003		24.2018	121.322	3040	GPS	symbiosis	Cetrelia	Lecanorales	Parmeliaceae	lichen	1	HS,S,W	3	no	no	no	0
LY0114	LY003		24.2018	121.322	3040	GPS	symbiosis	Lepra	Pertusariales	Variolariaceae	lichen	1	HS,S,W	3	no	no	no	0
LY0115	LY003		24.2018	121.322	3040	GPS	symbiosis	Lepra	Pertusariales	Variolariaceae	lichen	1	HS,S,W	3	no	no	no	0
LY0116	LY003		24.2018	121.322	3040	GPS	symbiosis	Ochrolechia	Lecanorales	Lecanorineae	lichen	1	HS,S,W	3	no	no	no	0
LY0117	LY003		24.2018	121.322	3040	GPS	symbiosis	Peltigera	Peltigerales	Peltigeraceae	lichen	1	HS,S,W	3	no	no	no	0
LY0118	LY003		24.2018	121.322	3040	GPS	symbiosis	Peltigera	Peltigerales	Peltigeraceae	lichen	1	HS,S,W	3	no	no	no	0
LY0119	LY005		24.158	121.286	3053	GPS	symbiosis	Trapelia	Baeomycetales	Trapeliaceae	lichen	1	HS,S,W	3	no	no	no	0
LY0120	LY003		24.2018	121.322	3040	GPS	symbiosis	Lobaria	Peltigerales	Lobariaceae	lichen	1	HS,S,W	3	no	no	no	0
LY0121	LY006		23.961	120.972	442	dem_20m_raw	symbiosis	Pseudocyphellaria	Peltigerales	Lobariaceae	lichen	1	HS,S,W	3	no	no	no	0
LY0122	LY006		23.961	120.972	442	dem_20m_raw	symbiosis				lichen	1	HS,S,W	3	no	no	no	0
LY0123	LY006		23.961	120.972	442	dem_20m_raw	symbiosis		Peltigerales	Pannariaceae	lichen	1	HS,S,W	3	no	no	no	0
LY0124	LY006		23.961	120.972	442	dem_20m_raw	symbiosis	Lobaria	Peltigerales	Lobariaceae	lichen	1	HS,S,W	3	no	no	no	0
LY0125	LY006		23.961	120.972	442	dem_20m_raw	symbiosis	Lobaria	Peltigerales	Lobariaceae	lichen	1	HS,S,W	3	no	no	no	0
LY0126	LY006		23.961	120.972	442	dem_20m_raw	symbiosis	Stereocaulon	Lecanorales	Cladoniaceae	lichen	1	HS,S,W	3	no	no	no	0
LY0127	LY006		23.961	120.972	442	dem_20m_raw	symbiosis				lichen	1	HS,S,W	3	no	no	no	0
LY0128	LY006		23.961	120.972	442	dem_20m_raw	symbiosis	Cetrelia	Lecanorales	Parmeliaceae	lichen	1	HS,S,W	3	no	no	no	0
LY0129	LY006		23.961	120.972	442	dem_20m_raw	symbiosis	Baeomyces	Baeomycetales	Baeomycetaceae	lichen	1	HS,S,W	3	no	no	no	0
LY0130	LY006		23.961	120.972	442	dem_20m_raw	symbiosis	Peltigera	Peltigerales	Peltigeraceae	lichen	1	HS,S,W	3	no	no	no	0
LY0131	LY006		23.961	120.972	442	dem_20m_raw	symbiosis				lichen	1	HS,S,W	3	no	no	no	0
LY0132	LY006		23.961	120.972	442	dem_20m_raw	symbiosis	Nephromopsis	Lecanorales	Parmeliaceae	lichen	1	HS,S,W	3	no	no	no	0
LY0133	LY006		23.961	120.972	442	dem_20m_raw	symbiosis	Nephromopsis	Lecanorales	Parmeliaceae	lichen	1	HS,S,W	3	no	no	no	0
LY0134	LY006		23.961	120.972	442	dem_20m_raw	symbiosis	Usnea	Lecanorales	Parmeliaceae	lichen	1	HS,S,W	3	no	no	no	0
LY0135	LY006		23.961	120.972	442	dem_20m_raw	symbiosis	Nephromopsis	Lecanorales	Parmeliaceae	lichen	1	HS,S,W	3	no	no	no	0
LY0136	LY006		23.961	120.972	442	dem_20m_raw	symbiosis	Coccocarpia	Peltigerales	Coccocarpiaceae	lichen	1	HS,S,W	3	no	no	no	0
LY0137	LY006		23.961	120.972	442	dem_20m_raw	symbiosis	Haematomma	Lecanorales	Haematommataceae	lichen	1	HS,S,W	3	no	no	no	0
LY0138	LY006		23.961	120.972	442	dem_20m_raw	symbiosis	Haematomma	Lecanorales	Haematommataceae	lichen	1	HS,S,W	3	no	no	no	0
LY0139	LY006		23.961	120.972	442	dem_20m_raw	symbiosis	Malmidea	Lecanorales	Malmideaceae	lichen	1	HS,S,W	3	no	no	no	0
LY0140	LY006		23.961	120.972	442	dem_20m_raw	symbiosis	Malmidea	Lecanorales	Malmideaceae	lichen	1	HS,S,W	3	no	no	no	0
LY0141	LY006		23.961	120.972	442	dem_20m_raw	symbiosis	Anzia	Lecanorales	Parmeliaceae	lichen	1	HS,S,W	3	no	no	no	0
LY0142	LY006		23.961	120.972	442	dem_20m_raw	symbiosis	Phaeophyscia	Teloschistales	Physciaceae	lichen	1	HS,S,W	3	no	no	no	0
LY0143	LY006		23.961	120.972	442	dem_20m_raw	symbiosis	Nephromopsis	Lecanorales	Parmeliaceae	lichen	1	HS,S,W	3	no	no	no	0
LY0144	LY006		23.961	120.972	442	dem_20m_raw	symbiosis	Leptogium	Peltigerales	Collemataceae	lichen	1	HS,S,W	3	no	no	no	0
LY0145	LY006		23.961	120.972	442	dem_20m_raw	symbiosis	Leioderma	Peltigerales	Pannariaceae	lichen	1	HS,S,W	3	no	no	no	0
LY0146	LY006		23.961	120.972	442	dem_20m_raw	symbiosis	Nephromopsis	Lecanorales	Parmeliaceae	lichen	1	HS,S,W	3	no	no	no	0
LY0147	LY006		23.961	120.972	442	dem_20m_raw	symbiosis	Menegazzia	Megalosporaceae	Megalosporaceae	lichen	1	HS,S,W	3	no	no	no	0
LY0148	LY006		23.961	120.972	442	dem_20m_raw	symbiosis	Nephromopsis	Lecanorales	Parmeliaceae	lichen	1	HS,S,W	3	no	no	no	0
LY0149	LY006		23.961	120.972	442	dem_20m_raw	symbiosis	Nephromopsis	Lecanorales	Parmeliaceae	lichen	1	HS,S,W	3	no	no	no	0
LY0150	LY006		23.961	120.972	442	dem_20m_raw	symbiosis	Hypotrachyna	Lecanorales	Parmeliaceae	lichen	1	HS,S,W	3	no	no	no	0
LY0151	LY002		24.2018	121.322	2450	GPS	symbiosis	Nephromopsis	Lecanorales	Parmeliaceae	lichen	1	HS,S,W	3	no	no	no	0
LY0152	LY002		24.2018	121.322	2450	GPS	symbiosis	Usnea	Lecanorales	Parmeliaceae	lichen	1	HS,S,W	3	no	no	no	0
LY0153	LY002		24.2018	121.322	2450	GPS	symbiosis	Menegazzia	Megalosporaceae	Megalosporaceae	lichen	1	HS,S,W	3	no	no	no	0
LY0154	LY002		24.2018	121.322	2450	GPS	symbiosis	Anzia	Lecanorales	Parmeliaceae	lichen	1	HS,S,W	3	no	no	no	0
LY0155	LY002		24.2018	121.322	2450	GPS	symbiosis	Hypotrachyna	Lecanorales	Parmeliaceae	lichen	1	HS,S,W	3	no	no	no	0
LY0156	LY002		24.2018	121.322	2450	GPS	symbiosis	Hypotrachyna	Lecanorales	Parmeliaceae	lichen	1	HS,S,W	3	no	no	no	0
LY0157	LY002		24.2018	121.322	2450	GPS	symbiosis	Hypogymnia	Lecanorales	Parmeliaceae	lichen	1	HS,S,W	3	no	no	no	0
LY0158	LY002		24.2018	121.322	2450	GPS	symbiosis	Nephroma	Peltigerales	Nephromataceae	lichen	1	HS,S,W	3	no	no	no	0
LY0159	LY006		23.961	120.972	442	dem_20m_raw	symbiosis	Lepraria	Lecanorales	Stereocaulaceae	lichen	1	HS,S,W	3	no	no	no	0
LY0160	LY002		24.2018	121.322	2450	GPS	symbiosis	Nephromopsis	Lecanorales	Parmeliaceae	lichen	1	HS,S,W	3	no	no	no	0
LY0161	LY006		23.961	120.972	442	dem_20m_raw	symbiosis	Leprocaulon		Leprocaulaceae	lichen	1	HS,S,W	3	no	no	no	0
LY0162	LY006		23.961	120.972	442	dem_20m_raw	symbiosis				lichen	1	HS,S,W	3	no	no	no	0
LY0163	LY006		23.961	120.972	442	dem_20m_raw	symbiosis	Psilolechia	Lecanorales	Psilolechiaceae	lichen	1	HS,S,W	3	no	no	no	0
LY0164	LY002		24.2018	121.322	2450	GPS	symbiosis	Podostictina	Peltigerales	Lobariaceae	lichen	1	HS,S,W	3	no	no	no	0
LY0165	LY002		24.2018	121.322	2450	GPS	symbiosis	Sulcaria	Lecanorales	Parmeliaceae	lichen	1	HS,S,W	3	no	no	no	0
LY0166	LY007		24.398	121.308	2100	GPS	symbiosis	Pyxine	Caliciales	Caliciaceae	lichen	1	HS,S,W	3	no	no	no	0
LY0167	LY007		24.398	121.308	2100	GPS	symbiosis	Sticta	Peltigerales	Lobariaceae	lichen	1	HS,S,W	3	no	no	no	0
LY0168	LY007		24.398	121.308	2100	GPS	symbiosis	Leptogium	Peltigerales	Collemataceae	lichen	1	HS,S,W	3	no	no	no	0
LY0169	LY007		24.398	121.308	2100	GPS	symbiosis	Pyxine	Caliciales	Caliciaceae	lichen	1	HS,S,W	3	no	no	no	0
LY0170	LY007		24.398	121.308	2100	GPS	symbiosis	Nephromopsis	Lecanorales	Parmeliaceae	lichen	1	HS,S,W	3	no	no	no	0
LY0171	LY007		24.398	121.308	2100	GPS	symbiosis	Coccocarpia	Peltigerales	Coccocarpiaceae	lichen	1	HS,S,W	3	no	no	no	0
LY0172	LY007		24.398	121.308	2100	GPS	symbiosis	Trypetheliaceae	Trypetheliales	Trypetheliaceae	lichen	1	HS,S,W	3	no	no	no	0
LY0173	LY007		24.398	121.308	2100	GPS	symbiosis	Lobaria	Peltigerales	Lobariaceae	lichen	1	HS,S,W	3	no	no	no	0
LY0174	LY007		24.398	121.308	2100	GPS	symbiosis	Punctelia	Lecanorales	Parmeliaceae	lichen	1	HS,S,W	3	no	no	no	0
LY0175	LY007		24.398	121.308	2100	GPS	symbiosis	Loxospora	Sarrameanales	Sarrameanaceae	lichen	1	HS,S,W	3	no	no	no	0
LY0176	LY007		24.398	121.308	2100	GPS	symbiosis	Cladonia	Lecanorales	Cladoniaceae	lichen	1	HS,S,W	3	no	no	no	0
LY0177	LY007		24.398	121.308	2100	GPS	symbiosis	Peltigera	Peltigerales	Peltigeraceae	lichen	1	HS,S,W	3	no	no	yes	1	LY0177	lichen	1	S	1
LY0178	LY007		24.398	121.308	2100	GPS	symbiosis	Trapeliopsis	Pertusariales	Agyriaceae	lichen	1	HS,S,W	3	no	no	no	0
LY0179	LY007		24.398	121.308	2100	GPS	symbiosis	Placynthiella	Agyriales	Agyriaceae	lichen	1	HS,S,W	3	no	no	no	0
LY0180	LY007		24.398	121.308	2100	GPS	symbiosis	Micarea	Lecanorales	Pilocarpaceae	lichen	1	HS,S,W	3	no	no	no	0
LY0181	LY007		24.398	121.308	2100	GPS	symbiosis	Hypocenomyce		Ophioparmaceae	lichen	1	HS,S,W	3	no	no	no	0
LY0182	LY007		24.398	121.308	2100	GPS	symbiosis	Tephromela	Lecanorales	Tephromelataceae	lichen	1	HS,S,W	3	no	no	no	0
LY0183	LY007		24.398	121.308	2100	GPS	symbiosis	Chaenotheca		Coniocybaceae	lichen	1	HS,S,W	3	no	no	no	0
LY0184	LY007		24.398	121.308	2100	GPS	symbiosis	Chaenotheca		Coniocybaceae	lichen	1	HS,S,W	3	no	no	no	0
LY0185	LY007		24.398	121.308	2100	GPS	symbiosis	Peltigera	Peltigerales	Peltigeraceae	lichen	1	HS,S,W	3	no	no	no	0
LY0186	LY007		24.398	121.308	2100	GPS	symbiosis	Cladia	Lecanorales	Cladoniaceae	lichen	1	HS,S,W	3	no	no	no	0
LY0187	LY007		24.398	121.308	2100	GPS	symbiosis	Dibaeis	Pertusariales	Icmadophilaceae	lichen	1	HS,S,W	3	no	no	no	0
LY0188	LY007		24.398	121.308	2100	GPS	symbiosis	Ramalina	Lecanorales	Ramalinaceae	lichen	1	HS,S,W	3	no	no	no	0
LY0189	LY007		24.398	121.308	2100	GPS	symbiosis	Lepra	Pertusariales	Variolariaceae	lichen	1	HS,S,W	3	no	no	no	0
LY0190	LY007		24.398	121.308	2100	GPS	symbiosis	Malmidea	Lecanorales	Malmideaceae	lichen	1	HS,S,W	3	no	no	no	0
LY0191	LY007		24.398	121.308	2100	GPS	symbiosis	Coccocarpia	Peltigerales	Coccocarpiaceae	lichen	1	HS,S,W	3	no	no	no	0
LY0192	LY007		24.398	121.308	2100	GPS	symbiosis	Pyrenula	Pyrenulales	Pyrenulaceae	lichen	1	HS,S,W	3	no	no	no	0
LY0193	LY007		24.398	121.308	2100	GPS	symbiosis	Pyxine	Caliciales	Caliciaceae	lichen	1	HS,S,W	3	no	no	no	0
LY0194	LY007		24.398	121.308	2100	GPS	symbiosis	Normadina	Verrucariales	Verrucariaceae	lichen	1	HS,S,W	3	no	no	no	0
LY0195	LY007		24.398	121.308	2100	GPS	symbiosis	Hypotrachyna	Lecanorales	Parmeliaceae	lichen	1	HS,S,W	3	no	no	no	0
LY0196	LY007		24.398	121.308	2100	GPS	symbiosis	Hypogymnia	Lecanorales	Parmeliaceae	lichen	1	HS,S,W	3	no	no	no	0
LY0197	LY007		24.398	121.308	2100	GPS	symbiosis	Parmotrema	lecanorales	Parmeliaceae	lichen	1	HS,S,W	3	no	no	yes	1	LY0197	lichen	1	S	1
LY0198	LY007		24.398	121.308	2100	GPS	symbiosis	Ramalina	Lecanorales	Ramalinaceae	lichen	1	HS,S,W	3	no	no	no	0
LY0199	LY007		24.398	121.308	2100	GPS	symbiosis	Menegazzia	Megalosporaceae	Megalosporaceae	lichen	1	HS,S,W	3	no	no	no	0
LY0200	LY007		24.398	121.308	2100	GPS	symbiosis	Heterodermia	Teloschistales	Physciaceae	lichen	1	HS,S,W	3	no	no	yes	1	LY0200	lichen	1	H	1
LY0201	LY007		24.398	121.308	2100	GPS	symbiosis	Cetrelia	Lecanorales	Parmeliaceae	lichen	1	HS,S,W	3	no	no	no	0
LY0202	LY007		24.398	121.308	2100	GPS	symbiosis	Pseudocyphelleria	Peltigerales	Lobariaceae	lichen	1	HS,S,W	3	no	no	no	0
LY0203	LY007		24.398	121.308	2100	GPS	symbiosis	Pyxine	Caliciales	Caliciaceae	lichen	1	HS,S,W	3	no	no	no	0
LY0204	LY007		24.398	121.308	2100	GPS	symbiosis	Porpidia	Lecideales	Lecideaceae	lichen	1	HS,S,W	3	no	no	no	0
LY0205	LY007		24.398	121.308	2100	GPS	symbiosis	Parmotrema	lecanorales	Parmeliaceae	lichen	1	HS,S,W	3	no	no	no	0
LY0206	LY007		24.398	121.308	2100	GPS	symbiosis	Pyxine	Caliciales	Caliciaceae	lichen	1	HS,S,W	3	no	no	no	0
LY0207	LY007		24.398	121.308	2100	GPS	symbiosis	Anzia	Lecanorales	Parmeliaceae	lichen	1	HS,S,W	3	no	no	no	0
LY0208	LY007		24.398	121.308	2100	GPS	symbiosis	Hypotrachyna	Lecanorales	Parmeliaceae	lichen	1	HS,S,W	3	no	no	no	0
LY0209	LY007		24.398	121.308	2100	GPS	symbiosis	Nephroma	Peltigerales	Nephromataceae	lichen	1	HS,S,W	3	no	no	no	0
LY0210	LY007		24.398	121.308	2100	GPS	symbiosis	Megalospora	Megalosporaceae	Megalosporaceae	lichen	1	HS,S,W	3	no	no	no	0
LY0211	LY007		24.398	121.308	2100	GPS	symbiosis	Porpidia	Lecideales	Lecideaceae	lichen	1	HS,S,W	3	no	no	no	0
LY0212	LY007		24.398	121.308	2100	GPS	symbiosis	Psilolechia	Lecanorales	Psilolechiaceae	lichen	1	HS,S,W	3	no	no	no	0
LY0213	LY007		24.398	121.308	2100	GPS	symbiosis	Baeomyces	Baeomycetales	Baeomycetaceae	lichen	1	HS,S,W	3	no	no	no	0
LY0214	LY007		24.398	121.308	2100	GPS	symbiosis	Dibaeis	Pertusariales	Icmadophilaceae	lichen	1	HS,S,W	3	no	no	no	0
LY0215	LY007		24.398	121.308	2100	GPS	symbiosis	Cladia	Lecanorales	Cladoniaceae	lichen	1	HS,S,W	3	no	no	yes	1	LY0215	lichen	1	S	1
LY0216	LY007		24.398	121.308	2100	GPS	symbiosis	Cladia	Lecanorales	Cladoniaceae	lichen	1	HS,S,W	3	no	no	no	0
LY0217	LY007		24.398	121.308	2100	GPS	symbiosis	Peltigera	Peltigerales	Peltigeraceae	lichen	1	HS,S,W	3	no	no	no	0
LY0218	LY007		24.398	121.308	2100	GPS	symbiosis	Cladia	Lecanorales	Cladoniaceae	lichen	1	HS,S,W	3	no	no	no	0
LY0219	LY007		24.398	121.308	2100	GPS	symbiosis	Cladia	Lecanorales	Cladoniaceae	lichen	1	HS,S,W	3	no	no	no	0
LY0220	LY007		24.398	121.308	2100	GPS	symbiosis	Cladia	Lecanorales	Cladoniaceae	lichen	1	HS,S,W	3	no	no	no	0
LY0221	LY007		24.398	121.308	2100	GPS	symbiosis	Pseudobaeomyces	Pertusariales	Icmadophilaceae	lichen	1	HS,S,W	3	no	no	no	0
LY0222	LY010		24.5092	121.61	1850	GPS	symbiosis	Bunodophoron	Lecanorales	Sphaerophoraceae	lichen	1	HS,S,W	3	no	no	no	0
LY0223	LY008		24.4949	121.535	1900	GPS	symbiosis	Icmadophila	Pertusariales	Icmadophilaceae	lichen	1	HS,S,W	3	no	no	no	0
LY0224	LY008		24.4949	121.535	1900	GPS	symbiosis	Dibaeis	Pertusariales	Icmadophilaceae	lichen	1	HS,S,W	3	no	no	no	0
LY0225	LY008		24.4949	121.535	1900	GPS	symbiosis				lichen	1	HS,S,W	3	no	no	no	0
LY0226	LY008		24.4949	121.535	1900	GPS	symbiosis	Lobariella	Peltigerales	Lobariaceae	lichen	1	HS,S,W	3	no	no	no	0
LY0227	LY008		24.4949	121.535	1900	GPS	symbiosis				lichen	1	HS,S,W	3	no	no	no	0
LY0228	LY008		24.4949	121.535	1900	GPS	symbiosis	Pseudocyphellaria	Peltigerales	Lobariaceae	lichen	1	HS,S,W	3	no	no	no	0
LY0229	LY008		24.4949	121.535	1900	GPS	symbiosis	Bunodophoron	Lecanorales	Sphaerophoraceae	lichen	1	HS,S,W	3	no	no	no	0
LY0230	LY008		24.4949	121.535	1900	GPS	symbiosis	Leprocaulon		Leprocaulaceae	lichen	1	HS,S,W	3	no	no	no	0
LY0231	LY008		24.4949	121.535	1900	GPS	symbiosis	Schizotrema	Graphidales	Thelotremataceae	lichen	1	HS,S,W	3	no	no	no	0
LY0232	LY008		24.4949	121.535	1900	GPS	symbiosis	Nephroma	Peltigerales	Nephromataceae	lichen	1	HS,S,W	3	no	no	no	0
LY0233	LY008		24.4949	121.535	1900	GPS	symbiosis				lichen	1	HS,S,W	3	no	no	no	0
LY0234	LY008		24.4949	121.535	1900	GPS	symbiosis				lichen	1	HS,S,W	3	no	no	no	0
LY0235	LY008		24.4949	121.535	1900	GPS	symbiosis	Chapsa	Ostropales	Graphidaceae	lichen	1	HS,S,W	3	no	no	no	0
LY0236	LY008		24.4949	121.535	1900	GPS	symbiosis	Varicellaria	Pertusariales	Varicellariaceae	lichen	1	HS,S,W	3	no	no	no	0
LY0237	LY008		24.4949	121.535	1900	GPS	symbiosis				lichen	1	HS,S,W	3	no	no	no	0
LY0238	LY008		24.4949	121.535	1900	GPS	symbiosis	Cladia	Lecanorales	Cladoniaceae	lichen	1	HS,S,W	3	no	no	no	0
LY0239	LY008		24.4949	121.535	1900	GPS	symbiosis	Hypogymnia	Lecanorales	Parmeliaceae	lichen	1	HS,S,W	3	no	no	no	0
LY0240	LY008		24.4949	121.535	1900	GPS	symbiosis	Lepra	Pertusariales	Variolariaceae	lichen	1	HS,S,W	3	no	no	no	0
LY0241	LY008		24.4949	121.535	1900	GPS	symbiosis	Hypotrachyna	Lecanorales	Parmeliaceae	lichen	1	HS,S,W	3	no	no	no	0
LY0242	LY008		24.4949	121.535	1900	GPS	symbiosis	Lobaria	Peltigerales	Lobariaceae	lichen	1	HS,S,W	3	no	no	no	0
LY0243	LY008		24.4949	121.535	1900	GPS	symbiosis	Pannaria	Peltigerales	Pannariaceae	lichen	1	HS,S,W	3	no	no	no	0
LY0244	LY008		24.4949	121.535	1900	GPS	symbiosis	Ocellularia	Ostropales	Thelotremataceae	lichen	1	HS,S,W	3	no	no	no	0
LY0245	LY008		24.4949	121.535	1900	GPS	symbiosis	Bunodophoron	Lecanorales	Sphaerophoraceae	lichen	1	HS,S,W	3	no	no	no	0
LY0246	LY008		24.4949	121.535	1900	GPS	symbiosis	Ochrolechia	Lecanorales	Lecanorineae	lichen	1	HS,S,W	3	no	no	no	0
LY0247	LY008		24.4949	121.535	1900	GPS	symbiosis				lichen	1	HS,S,W	3	no	no	no	0
LY0248	LY008		24.4949	121.535	1900	GPS	symbiosis	Pseudocyphelleria	Peltigerales	Lobariaceae	lichen	1	HS,S,W	3	no	no	no	0
LY0249	LY008		24.4949	121.535	1900	GPS	symbiosis				lichen	1	HS,S,W	3	no	no	no	0
LY0250	LY008		24.4949	121.535	1900	GPS	symbiosis				lichen	1	HS,S,W	3	no	no	no	0
LY0251	LY008		24.4949	121.535	1900	GPS	symbiosis	Coccotrema	Pertusariales	Coccotremataceae	lichen	1	HS,S,W	3	no	no	no	0
LY0252	LY008		24.4949	121.535	1900	GPS	symbiosis				lichen	1	HS,S,W	3	no	no	no	0
LY0253	LY008		24.4949	121.535	1900	GPS	symbiosis	Bunodophoron	Lecanorales	Sphaerophoraceae	lichen	1	HS,S,W	3	no	no	no	0
LY0254	LY008		24.4949	121.535	1900	GPS	symbiosis	Chapsa	Ostropales	Graphidaceae	lichen	1	HS,S,W	3	no	no	no	0
LY0255	LY008		24.4949	121.535	1900	GPS	symbiosis	Sticta	Peltigerales	Lobariaceae	lichen	1	HS,S,W	3	no	no	no	0
LY0256	LY008		24.4949	121.535	1900	GPS	symbiosis	Ocellularia	Ostropales	Thelotremataceae	lichen	1	HS,S,W	3	no	no	no	0
LY0257	LY008		24.4949	121.535	1900	GPS	symbiosis	Bunodophoron	Lecanorales	Sphaerophoraceae	lichen	1	HS,S,W	3	no	no	no	0
LY0258	LY008		24.4949	121.535	1900	GPS	symbiosis	Parmelia	lecanorales	Parmeliaceae	lichen	1	HS,S,W	3	no	no	no	0
LY0259	LY008		24.4949	121.535	1900	GPS	symbiosis	Usnea	Lecanorales	Parmeliaceae	lichen	1	HS,S,W	3	no	no	no	0
LY0260	LY008		24.4949	121.535	1900	GPS	symbiosis	Crocodia			lichen	1	HS,S,W	3	no	no	no	0
LY0261	LY008		24.4949	121.535	1900	GPS	symbiosis	Lobariella	Peltigerales	Lobariaceae	lichen	1	HS,S,W	3	no	no	no	0
LY0262	LY008		24.4949	121.535	1900	GPS	symbiosis	Sticta	Peltigerales	Lobariaceae	lichen	1	HS,S,W	3	no	no	no	0
LY0263	LY008		24.4949	121.535	1900	GPS	symbiosis	Hypotrachyna	Lecanorales	Parmeliaceae	lichen	1	HS,S,W	3	no	no	no	0
LY0264	LY008		24.4949	121.535	1900	GPS	symbiosis	Lepra	Pertusariales	Variolariaceae	lichen	1	HS,S,W	3	no	no	no	0
LY0265	LY008		24.4949	121.535	1900	GPS	symbiosis	Pseudocyphelleria	Peltigerales	Lobariaceae	lichen	1	HS,S,W	3	no	no	no	0
LY0266	LY008		24.4949	121.535	1900	GPS	symbiosis	Cladia	Lecanorales	Cladoniaceae	lichen	1	HS,S,W	3	no	no	no	0
LY0267	LY008		24.4949	121.535	1900	GPS	symbiosis	Haematomma	Lecanorales	Haematommataceae	lichen	1	HS,S,W	3	no	no	no	0
LY0268	LY008		24.4949	121.535	1900	GPS	symbiosis				lichen	1	HS,S,W	3	no	no	no	0
LY0269	LY008		24.4949	121.535	1900	GPS	symbiosis	Sphaerophorus	Lecanorales	Sphaerophoraceae	lichen	1	HS,S,W	3	no	no	no	0
LY0270	LY008		24.4949	121.535	1900	GPS	symbiosis	Pertusaria	Pertusariales	Pertusariaceae	lichen	1	HS,S,W	3	no	no	no	0
LY0271	LY008		24.4949	121.535	1900	GPS	symbiosis	Coccocarpia	Peltigerales	Coccocarpiaceae	lichen	1	HS,S,W	3	no	no	no	0
LY0272	LY008		24.4949	121.535	1900	GPS	symbiosis	Lecanora	Lecanorales	Lecanoraceae	lichen	1	HS,S,W	3	no	no	no	0
LY0273	LY008		24.4949	121.535	1900	GPS	symbiosis	Lecanora	Lecanorales	Lecanoraceae	lichen	1	HS,S,W	3	no	no	no	0
LY0274	LY008		24.4949	121.535	1900	GPS	symbiosis	Pseudocyphelleria	Peltigerales	Lobariaceae	lichen	1	HS,S,W	3	no	no	no	0
LY0275	LY008		24.4949	121.535	1900	GPS	symbiosis	Gyalectaria			lichen	1	HS,S,W	3	no	no	no	0
LY0276	LY008		24.4949	121.535	1900	GPS	symbiosis	Cladia	Lecanorales	Cladoniaceae	lichen	1	HS,S,W	3	no	no	no	0
LY0277	LY008		24.4949	121.535	1900	GPS	symbiosis	Cladia	Lecanorales	Cladoniaceae	lichen	1	HS,S,W	3	no	no	no	0
LY0278	LY008		24.4949	121.535	1900	GPS	symbiosis	Thecaria	Graphidales	Graphidaceae	lichen	1	HS,S,W	3	no	no	no	0
LY0279	LY008		24.4949	121.535	1900	GPS	symbiosis	Cladia	Lecanorales	Cladoniaceae	lichen	1	HS,S,W	3	no	no	no	0
LY0280	LY008		24.4949	121.535	1900	GPS	symbiosis	Ocellularia	Ostropales	Thelotremataceae	lichen	1	HS,S,W	3	no	no	no	0
LY0281	LY008		24.4949	121.535	1900	GPS	symbiosis	Cladia	Lecanorales	Cladoniaceae	lichen	1	HS,S,W	3	no	no	no	0
LY0282	LY008		24.4949	121.535	1900	GPS	symbiosis				lichen	1	HS,S,W	3	no	no	no	0
LY0283	LY008		24.4949	121.535	1900	GPS	symbiosis	Ochrolechia	Lecanorales	Lecanorineae	lichen	1	HS,S,W	3	no	no	no	0
LY0284	LY008		24.4949	121.535	1900	GPS	symbiosis				lichen	1	HS,S,W	3	no	no	no	0
LY0285	LY008		24.4949	121.535	1900	GPS	symbiosis	Leprocaulon		Leprocaulaceae	lichen	1	HS,S,W	3	no	no	no	0
LY0286	LY008		24.4949	121.535	1900	GPS	symbiosis	Heterodermia	Teloschistales	Physciaceae	lichen	1	HS,S,W	3	no	no	no	0
LY0287	LY009		24.5129	121.609	1840	GPS	symbiosis	Cladia	Lecanorales	Cladoniaceae	lichen	1	HS,S,W	3	no	no	no	0
LY0288	LY009		24.5129	121.609	1840	GPS	symbiosis	Cladia	Lecanorales	Cladoniaceae	lichen	1	HS,S,W	3	no	no	no	0
LY0289	LY009		24.5129	121.609	1840	GPS	symbiosis				lichen	1	HS,S,W	3	no	no	no	0
LY0290	LY009		24.5129	121.609	1840	GPS	symbiosis	Cladia	Lecanorales	Cladoniaceae	lichen	1	HS,S,W	3	no	no	no	0
LY0291	LY009		24.5129	121.609	1840	GPS	symbiosis	Thelotrema	Graphidales	Thelotremataceae	lichen	1	HS,S,W	3	no	no	no	0
LY0292	LY008		24.4949	121.535	1900	GPS	symbiosis	Cetrelia	Lecanorales	Parmeliaceae	lichen	1	HS,S,W	3	no	no	no	0
LY0293	LY009		24.5129	121.609	1840	GPS	symbiosis	Topeliopsis	Graphidales	Diploschistaceae	lichen	1	HS,S,W	3	no	no	no	0
LY0294	LY009		24.5129	121.609	1840	GPS	symbiosis	Cladia	Lecanorales	Cladoniaceae	lichen	1	HS,S,W	3	no	no	no	0
LY0295	LY009		24.5129	121.609	1840	GPS	symbiosis	Hypotrachyna	Lecanorales	Parmeliaceae	lichen	1	HS,S,W	3	no	no	no	0
LY0296	LY008		24.4949	121.535	1900	GPS	symbiosis	Bunodophoron	Lecanorales	Sphaerophoraceae	lichen	1	HS,S,W	3	no	no	no	0
LY0297	LY009		24.5129	121.609	1840	GPS	symbiosis	Leioderma	Peltigerales	Pannariaceae	lichen	1	HS,S,W	3	no	no	no	0
LY0298	LY008		24.4949	121.535	1900	GPS	symbiosis	Menegazzia	Megalosporaceae	Megalosporaceae	lichen	1	HS,S,W	3	no	no	no	0
LY0299	LY008		24.4949	121.535	1900	GPS	symbiosis	Hypotrachyna	Lecanorales	Parmeliaceae	lichen	1	HS,S,W	3	no	no	no	0
LY0300	LY009		24.5129	121.609	1840	GPS	symbiosis	Chapsa	Ostropales	Graphidaceae	lichen	1	HS,S,W	3	no	no	no	0
LY0301	LY009		24.5129	121.609	1840	GPS	symbiosis	Cladia	Lecanorales	Cladoniaceae	lichen	1	HS,S,W	3	no	no	no	0
LY0302	LY009		24.5129	121.609	1840	GPS	symbiosis	Cladia	Lecanorales	Cladoniaceae	lichen	1	HS,S,W	3	no	no	no	0
LY0303	LY008		24.4949	121.535	1900	GPS	symbiosis	Dibaes	Pertusariales	Icmadophilaceae	lichen	1	HS,S,W	3	no	no	no	0
LY0304	LY008		24.4949	121.535	1900	GPS	symbiosis	Heterodermia	Teloschistales	Physciaceae	lichen	1	HS,S,W	3	no	no	no	0
LY0305	LY008		24.4949	121.535	1900	GPS	symbiosis				lichen	1	HS,S,W	3	no	no	no	0
LY0306	LY010		24.5092	121.61	1850	GPS	symbiosis	Cladia	Lecanorales	Cladoniaceae	lichen	1	HS,S,W	3	no	no	no	0
LY0307	LY010		24.5092	121.61	1850	GPS	symbiosis	Sticta	Peltigerales	Lobariaceae	lichen	1	HS,S,W	3	no	no	no	0
LY0308	LY010		24.5092	121.61	1850	GPS	symbiosis	Caliceium			lichen	1	HS,S,W	3	no	no	no	0
LY0309	LY010		24.5092	121.61	1850	GPS	symbiosis	Cladia	Lecanorales	Cladoniaceae	lichen	1	HS,S,W	3	no	no	no	0
LY0310	LY010		24.5092	121.61	1850	GPS	symbiosis	Cladia	Lecanorales	Cladoniaceae	lichen	1	HS,S,W	3	no	no	no	0
LY0311	LY010		24.5092	121.61	1850	GPS	symbiosis	Cladia	Lecanorales	Cladoniaceae	lichen	1	HS,S,W	3	no	no	no	0
LY0312	LY010		24.5092	121.61	1850	GPS	symbiosis	Dibaeis	Pertusariales	Icmadophilaceae	lichen	1	HS,S,W	3	no	no	no	0
LY0313	LY008		24.4949	121.535	1900	GPS	symbiosis	Lecanora	Lecanorales	Lecanoraceae	lichen	1	HS,S,W	3	no	no	no	0
LY0314	LY008		24.4949	121.535	1900	GPS	symbiosis				lichen	1	HS,S,W	3	no	no	no	0
LY0315	LY010		24.5092	121.61	1850	GPS	symbiosis	Peltigera	Peltigerales	Peltigeraceae	lichen	1	HS,S,W	3	no	no	no	0
LY0316	LY010		24.5092	121.61	1850	GPS	symbiosis	Sticta	Peltigerales	Lobariaceae	lichen	1	HS,S,W	3	no	no	no	0
LY0317	LY008		24.4949	121.535	1900	GPS	symbiosis				lichen	1	HS,S,W	3	no	no	no	0
LY0318	LY010		24.5092	121.61	1850	GPS	symbiosis	Lecanora	Lecanorales	Lecanoraceae	lichen	1	HS,S,W	3	no	no	no	0
LY0319	LY010		24.5092	121.61	1850	GPS	symbiosis	Lecanora	Lecanorales	Lecanoraceae	lichen	1	HS,S,W	3	no	no	no	0
LY0320	LY010		24.5092	121.61	1850	GPS	symbiosis	Loxospora	Sarrameanales	Sarrameanaceae	lichen	1	HS,S,W	3	no	no	no	0
LY0321	LY010		24.5092	121.61	1850	GPS	symbiosis	Hypotrachyna	Lecanorales	Parmeliaceae	lichen	1	HS,S,W	3	no	no	no	0
LY0322	LY010		24.5092	121.61	1850	GPS	symbiosis	Anzia	Lecanorales	Parmeliaceae	lichen	1	HS,S,W	3	no	no	no	0
LY0323	LY008		24.4949	121.535	1900	GPS	symbiosis	Lecanora	Lecanorales	Lecanoraceae	lichen	1	HS,S,W	3	no	no	no	0
LY0324	LY010		24.5092	121.61	1850	GPS	symbiosis	Ocellularia	Ostropales	Thelotremataceae	lichen	1	HS,S,W	3	no	no	no	0
LY0325	LY010		24.5092	121.61	1850	GPS	symbiosis	Coccotrema	Pertusariales	Coccotremataceae	lichen	1	HS,S,W	3	no	no	no	0
LY0326	LY008		24.4949	121.535	1900	GPS	symbiosis	Haematomma	Lecanorales	Haematommataceae	lichen	1	HS,S,W	3	no	no	no	0
LY0327	LY008		24.4949	121.535	1900	GPS	symbiosis	Lecanora	Lecanorales	Lecanoraceae	lichen	1	HS,S,W	3	no	no	no	0
LY0328	LY008		24.4949	121.535	1900	GPS	symbiosis	Haematomma	Lecanorales	Haematommataceae	lichen	1	HS,S,W	3	no	no	no	0
LY0329	LY008		24.4949	121.535	1900	GPS	symbiosis	Megalospora	Megalosporaceae	Megalosporaceae	lichen	1	HS,S,W	3	no	no	no	0
LY0330	LY010		24.5092	121.61	1850	GPS	symbiosis	Pseudocyphelleria	Peltigerales	Lobariaceae	lichen	1	HS,S,W	3	no	no	no	0
LY0331	LY010		24.5092	121.61	1850	GPS	symbiosis	Ocellularia	Ostropales	Thelotremataceae	lichen	1	HS,S,W	3	no	no	no	0
LY0332	LY010		24.5092	121.61	1850	GPS	symbiosis				lichen	1	HS,S,W	3	no	no	no	0
LY0333	LY010		24.5092	121.61	1850	GPS	symbiosis	Gintarasia			lichen	1	HS,S,W	3	no	no	no	0
LY0334	LY010		24.5092	121.61	1850	GPS	symbiosis	Bunodophoron	Lecanorales	Sphaerophoraceae	lichen	1	HS,S,W	3	no	no	no	0
LY0335	LY010		24.5092	121.61	1850	GPS	symbiosis	Schizotrema	Graphidales	Thelotremataceae	lichen	1	HS,S,W	3	no	no	no	0
LY0336	LY010		24.5092	121.61	1850	GPS	symbiosis	Sticta	Peltigerales	Lobariaceae	lichen	1	HS,S,W	3	no	no	no	0
LY0337	LY010		24.5092	121.61	1850	GPS	symbiosis	Lepra	Pertusariales	Variolariaceae	lichen	1	HS,S,W	3	no	no	no	0
LY0338	LY010		24.5092	121.61	1850	GPS	symbiosis	Pseudocyphelleria	Peltigerales	Lobariaceae	lichen	1	HS,S,W	3	no	no	no	0
LY0339	LY010		24.5092	121.61	1850	GPS	symbiosis	Pannaria	Peltigerales	Pannariaceae	lichen	1	HS,S,W	3	no	no	no	0

## Sheet: S2
Supplemental Table S2. Detailed information on sampled plant hosts and associated isolation success rates.
Host order	Host family	Host genus	Sampled plants	Number of S. cerevisiae isolate recovered (n)	Yeast isolate ID	Substrates where S. cerevisiae was recovered	(n)	Media where S. cerevisiae was recovered	(n)	Isolation success rate (%)
Sapindales	Sapindaceae	Koelreuteria	2	2	XI02,S3	bark,litter	2	HS	1	100
Ericales	Sapotaceae	Palaquium	1	1	S1	soil	1	HS	1	100
Laurales	Lauraceae	Litsea	8	5	H359-1,H411-8,H347-8,SPA0359,H415-8	twig,leaf,litter	3	HS,S	2	62.5
Laurales	Lauraceae	Actinodaphne	2	1	H416-8	litter	1	HS	1	50
Cornales	Hydrangeaceae	Hydrangea	2	1	H412-8	litter	1	HS	1	50
Ericales	Symplocaceae	Symplocos	2	1	H352-8	litter	1	HS	1	50
Rosales	Moraceae	Broussonetia	5	2	PD26A,PD27A	forest_fruit	1	HS,S	2	40
Fagales	Fagaceae	Quercus	131	49	SR15,S11,SR10,PD12A,SPA0366,PD02A,PD07A,PD06A,PD03A,PD10A,SR21,SR20,S15,PD40A,PD34A,S6,PD08A,RG11,PD01B,S14,SR18,SPA0348,PD17A,S8,PD18A,PD20A,PD19A,SR11,PD14A,PD21B,PD09A,PD15A,PD05B,SR19,H348-7,PD11A,SR26,RG08,S13,S10,PD16A,PD23A,PD13B,PD22A,S9,PD24A,SR09,PD04A,SR14	litter,forest_fruit,twig,bark,soil,leaf	6	HS,LS,S,W	4	38.28
Apiales	Araliaceae	Fatsia	8	3	SPA0354,SPA0356,H413-8	soil,others,litter	3	HS,S	2	37.5
Zingiberales	Zingiberaceae	Hedychium	3	1	S16	litter	1	S	1	33.33
Saxifragales	Iteaceae	Itea	3	1	XI04	twig	1	S	1	33.33
Crossosomatales	Stachyuraceae	Stachyurus	3	1	XI07	twig	1	HS	1	33.33
Rosales	Ulmaceae	Ulmus	3	1	XI06	leaf	1	S	1	33.33
Fagales	Fagaceae	Castanopsis	54	14	PD33A,PD30A,PD38A,SR22,S5,SR27,PD28A,SR28,PD29A,PD36A,PD32A,PD37B,S12,PD35A	litter,forest_fruit,fallen_fruit,bark,leaf,others	5	HS,S	2	25.93
Ericales	Primulaceae	Ardisia	8	2	S17,RG06	forest_fruit,leaf	2	HS,S	2	25
Pinales	Pinaceae	Pinus	4	1	PD41A	fallen_fruit	1	HS	1	25
Laurales	Lauraceae	Cinnamomum	5	1	PD31A	bark	1	HS	1	20
Ericales	Pentaphylacaceae	Eurya	5	1	PD25A	leaf	1	HS	1	20
Malpighiales	Euphorbiaceae	Mallotus	5	1	S7	soil	1	S	1	20
Fagales	Fagaceae	Lithocarpus	57	11	PD39A,H344-7,H342-1,SR16,H409-8,H414-8,SR13,SR12,SPA0342,SR17,SPA0344	soil,leaf,flower,litter	4	HS	1	19.3
Sapindales	Sapindaceae	Acer	7	1	S2	bark	1	S	1	14.29
Rosales	Rosaceae	Eriobotrya	7	1	H346-1	leaf	1	HS	1	14.29
Fagales	Fagaceae	Fagus	7	1	SR23	litter	1	HS	1	14.29
Polypodiales	Polypodiaceae	Lemmaphyllum	18	2	S18,S4	others	1	HS	1	11.11
Laurales	Lauraceae	Machilus	25	2	H420-8,H418-7	soil,litter	2	HS	1	8
Fabales	Fabaceae	Acacia	2	0			0		0	0
Ericales	Pentaphylacaceae	Adinandra	1	0			0		0	0
Fagales	Betulaceae	Alnus	7	0			0		0	0
Alismatales	Araceae	Alocasia	1	0			0		0	0
Zingiberales	Zingiberaceae	Alpinia	1	0			0		0	0
Vitales	Vitaceae	Ampelopsis	1	0			0		0	0
Apiales	Araliaceae	Aralia	1	0			0		0	0
Fabales	Fabaceae	Archidendron	1	0			0		0	0
Arecales	Arecaceae	Archontophoenix	1	0			0		0	0
Polypodiales	Aspleniaceae	Asplenium	3	0			0		0	0
Asterales	Asteraceae	Aster	1	0			0		0	0
Oxalidales	Oxalidaceae	Averrhoa	1	0			0		0	0
Ericales	Lecythidaceae	Barringtonia	1	0			0		0	0
Fabales	Fabaceae	Bauhinia	2	0			0		0	0
Laurales	Lauraceae	Beilschmiedia	1	0			0		0	0
Ranunculales	Berberidaceae	Berberis	1	0			0		0	0
Malpighiales	Phyllanthaceae	Bischofia	4	0			0		0	0
Rosales	Urticaceae	Boehmeria	1	0			0		0	0
Malpighiales	Phyllanthaceae	Bridelia	1	0			0		0	0
Fabales	Fabaceae	Calliandra	1	0			0		0	0
Lamiales	Lamiaceae	Callicarpa	7	0			0		0	0
Pinales	Cupressaceae	Calocedrus	2	0			0		0	0
Sapindales	Burseraceae	Canarium	1	0			0		0	0
Poales	Poaceae	Carex	1	0			0		0	0
Brassicales	Caricaceae	Carica	1	0			0		0	0
Fagales	Fagaceae	Castanea	1	0			0		0	0
Rosales	Cannabaceae	Celtis	2	0			0		0	0
Gentianales	Rubiaceae	Cephalanthus	1	0			0		0	0
Pinales	Cupressaceae	Chamaecyparis	4	0			0		0	0
Sapindales	Rutaceae	Citrus	1	0			0		0	0
Ranunculales	Ranunculaceae	Clematis	4	0			0		0	0
Lamiales	Lamiaceae	Clerodendrum	1	0			0		0	0
Ericales	Pentaphylacaceae	Cleyera	5	0			0		0	0
Brassicales	Capparaceae	Crateva	1	0			0		0	0
Asparagales	Amaryllidaceae	Crinum	1	0			0		0	0
Laurales	Lauraceae	Cryptocarya	1	0			0		0	0
Pinales	Cupressaceae	Cunninghamia	1	0			0		0	0
Gentianales	Rubiaceae	Damnacanthus	1	0			0		0	0
Rosales	Urticaceae	Debregeasia	3	0			0		0	0
Polypodiales	Athyriaceae	Deparia	1	0			0		0	0
Cornales	Hydrangeaceae	Deutzia	2	0			0		0	0
Gleicheniales	Gleicheniaceae	Dicranopteris	1	0			0		0	0
Sapindales	Sapindaceae	Dimocarpus	2	0			0		0	0
Ericales	Ebenaceae	Diospyros	4	0			0		0	0
Polypodiales	Athyriaceae	Diplazium	1	0			0		0	0
Cucurbitales	Cucurbitaceae	Diplocyclos	1	0			0		0	0
Lamiales	Verbenaceae	Duranta	1	0			0		0	0
Rosales	Elaeagnaceae	Elaeagnus	1	0			0		0	0
Fagales	Juglandaceae	Engelhardia	1	0			0		0	0
Crossosomatales	Staphyleaceae	Euscaphis	3	0			0		0	0
Rosales	Moraceae	Ficus	17	0			0		0	0
Lamiales	Oleaceae	Fraxinus	1	0			0		0	0
Gentianales	Rubiaceae	Gardenia	1	0			0		0	0
Fabales	Fabaceae	Glycine	1	0			0		0	0
Lamiales	Bignoniaceae	Handroanthus	1	0			0		0	0
Proteales	Proteaceae	Helicia	1	0			0		0	0
Boraginales	Boraginaceae	Heliotropium	2	0			0		0	0
Lamiales	Gesneriaceae	Hemiboea	2	0			0		0	0
Apiales	Araliaceae	Heptapleurum	4	0			0		0	0
Malvales	Malvaceae	Hibiscus	1	0			0		0	0
Aquifoliales	Aquifoliaceae	Ilex	1	0			0		0	0
Solanales	Convolvulaceae	Ipomoea	3	0			0		0	0
Poales	Poaceae	Isachne	1	0			0		0	0
Gentianales	Rubiaceae	Ixora	3	0			0		0	0
Fagales	Juglandaceae	Juglans	4	0			0		0	0
Pinales	Cupressaceae	Juniperus	1	0			0		0	0
Myrtales	Lythraceae	Lagerstroemia	1	0			0		0	0
Gentianales	Rubiaceae	Lasianthus	1	0			0		0	0
Fabales	Fabaceae	Leucaena	1	0			0		0	0
Lamiales	Oleaceae	Ligustrum	2	0			0		0	0
Saxifragales	Altingiaceae	Liquidambar	4	0			0		0	0
Brassicales	Caprifoliaceae	Lonicera	2	0			0		0	0
Schizaeales	Lygodiaceae	Lygodium	1	0			0		0	0
Magnoliales	Magnoliaceae	Magnolia	4	0			0		0	0
Sapindales	Anacardiaceae	Mangifera	1	0			0		0	0
Myrtales	Melastomataceae	Melastoma	2	0			0		0	0
Proteales	Sabiaceae	Meliosma	10	0			0		0	0
Fabales	Fabaceae	Mimosa	1	0			0		0	0
Rosales	Moraceae	Morus	4	0			0		0	0
Sapindales	Rutaceae	Murraya	1	0			0		0	0
Zingiberales	Musaceae	Musa	1	0			0		0	0
Laurales	Lauraceae	Neolitsea	2	0			0		0	0
Polypodiales	Nephrolepidaceae	Nephrolepis	1	0			0		0	0
Lamiales	Linderniaceae	Orenia	1	0			0		0	0
Rosales	Urticaceae	Oreocnide	3	0			0		0	0
Fabales	Fabaceae	Ormosia	1	0			0		0	0
Oxalidales	Oxalidaceae	Oxalis	1	0			0		0	0
Malvales	Malvaceae	Pachira	3	0			0		0	0
Pandanales	Pandanaceae	Pandanus	1	0			0		0	0
Caryophyllales	Polygonaceae	Persicaria	1	0			0		0	0
Rosales	Rosaceae	Photinia	3	0			0		0	0
Poales	Poaceae	Phyllostachys	1	0			0		0	0
Rosales	Rosaceae	Prunus	4	0			0		0	0
Myrtales	Myrtaceae	Psidium	1	0			0		0	0
Gentianales	Rubiaceae	Psychotria	3	0			0		0	0
Fabales	Fabaceae	Pueraria	1	0			0		0	0
Polypodiales	Polypodiaceae	Pyrrosia	1	0			0		0	0
Caryophyllales	Polygonaceae	Reynoutria	3	0			0		0	0
Ericales	Ericaceae	Rhododendron	4	0			0		0	0
Rosales	Rosaceae	Rubus	4	0			0		0	0
Malpighiales	Salicaceae	Salix	1	0			0		0	0
Ericales	Actinidiaceae	Saurauia	3	0			0		0	0
Selaginellales	Selaginellaceae	Selaginella	1	0			0		0	0
Oxalidales	Elaeocarpaceae	Sloanea	1	0			0		0	0
Liliales	Smilacaceae	Smilax	1	0			0		0	0
Solanales	Solanaceae	Solanum	1	0			0		0	0
Cytheales	Cyatheaceae	Sphaeropteris	1	0			0		0	0
Lamiales	Verbenaceae	Stachytarpheta	1	0			0		0	0
Ericales	Styracaceae	Styrax	3	0			0		0	0
Myrtales	Myrtaceae	Syzygium	3	0			0		0	0
Pinales	Cupressaceae	Taiwania	3	0			0		0	0
Myrtale	Combretaceae	Terminalia	1	0			0		0	0
Sapindales	Rutaceae	Tetradium	1	0			0		0	0
Apiales	Araliaceae	Tetrapanax	1	0			0		0	0
Cucurbitales	Cucurbitaceae	Thladiantha	2	0			0		0	0
Asterales	Asteraceae	Tithonia	1	0			0		0	0
Sapindales	Anacardiaceae	Toxicodendron	1	0			0		0	0
Rosales	Cannabaceae	Trema	2	0			0		0	0
Malpighiales	Euphorbiaceae	Triadica	2	0			0		0	0
Liliales	Liliaceae	Tricyrtis	1	0			0		0	0
Fabales	Fabaceae	Trifolium	1	0			0		0	0
Trochodendrales	Trochodendraceae	Trochodendron	3	0			0		0	0
Crossosomatales	Staphyleaceae	Turpinia	3	0			0		0	0
Malpighiales	Euphorbiaceae	Vernicia	7	0			0		0	0
Dipsacales	Adoxaceae	Viburnum	7	0			0		0	0
Gentianales	Rubiaceae	Wendlandia	2	0			0		0	0
Malvales	Thymelaeaceae	Wikstroemia	1	0			0		0	0
Polypodiales	Blechnaceae	Woodwardia	1	0			0		0	0
Poales	Poaceae	Yushania	3	0			0		0	0
Sapindales	Rutaceae	Zanthoxylum	1	0			0		0	0
Rosales	Ulmaceae	Zelkova	3	0			0		0	0
Fagales	Fagaceae	NA	4	0			0		0	0
Laurales	Lauraceae	NA	1	0			0		0	0
Rosales	Rosaceae	NA	1	0			0		0	0
NA	NA	NA	40	0			0		0	0

## Sheet: S3
Supplemental Table S3. Isolation success rates in different types of samples, and in different months of the year from plant samples.
Study	Sample types and collection months	Number of isolates	Number of source with isolate	Number of source	Isolation success: source (%)	Number of substrates	Isolation success : substrate (%)	Number of incubations	Isolation success: substrate x incubation (%)	Additional notes
this study	Plants	107	75	693	10.8225	2053	5.21189	5526	1.9363
this study	non-plants (alcohol)	3	3	4	75	4	75	3	100
this study	non-plants (lichen)	4	4	339	1.17994	339	1.17994	1017	0.393314
this study	non-plants (others; e.g., insects)	2	2	65	3.07692	65	3.07692	80	2.5
this study	non-plants (isolates purchased from BCRC)	5
		121
this study	Plants - leaf	23	21	528	3.97727			1348	1.70623
this study	Plants - twig	9	6	328	1.82927			943	0.954401
this study	Plants - bark	14	14	340	4.11765			904	1.54867
this study	Plants - flower	1	1	75	1.33333			176	0.568182
this study	Plants - fruit	5	4	78	5.12821			190	2.63158
this study	Plants - root	0	0	7	0			21	0
this study	Plants - soil	20	12	272	4.41176			792	2.52525
this study	Plants - litter	28	26	320	8.125			900	3.11111
this study	Plants - others	7	6	105	5.71429			252	2.77778
this study	Plants - January	0	0	0	0	0	0	0	0
this study	Plants - February	0	0	0	0	0	0	0	0
this study	Plants - March	2	2	68	2.94118	126	1.5873	250	0.8
this study	Plants - April	0	0	6	0	13	0	26	0
this study	Plants - May	0	0	0	0	0	0	0	0
this study	Plants - June	0	0	0	0	0	0	0	0
this study	Plants - July	39	21	111	18.9189	510	7.64706	1578	2.47148
this study	Plants - Augustus	5	5	117	4.2735	335	1.49254	940	0.531915
this study	Plants - September	14	11	63	17.4603	155	9.03226	353	3.96601
this study	Plants - October	13	13	115	11.3043	400	3.25	1070	1.21495
this study	Plants - November	3	2	29	6.89655	48	6.25	96	3.125
this study	Plants - December	31	21	192	10.9375	466	6.65236	1213	2.55565
Sniegowski et al	North American oaks	10	10	36	27.7778	79	12.6582			Sniegowski, P. D., Dombrowski, P. G. & Fingerman, E. Saccharomyces cerevisiae and Saccharomyces paradoxus coexist in a natural woodland site in North America and display different levels of reproductive isolation from European conspecifics. FEMS Yeast Research 1, 299-306, doi:10.1016/S1567-1356(01)00043-5 (2002)
Almeida et al	Mediterranean oaks	75								Almeida, P. et al. A population genomics insight into the Mediterranean origins of wine yeast domestication. Molecular Ecology, 5412-5427, doi:10.1111/mec.13341 (2015).
Wang et al	Chinese wild populations	226	226	2064	10.9496					Wang, Q. M., Liu, W. Q., Liti, G., Wang, S. A. & Bai, F. Y. Surprisingly diverged populations of Saccharomyces cerevisiae in natural environments remote from human activity. Molecular Ecology 21, 5404-5417, doi:10.1111/j.1365-294X.2012.05732.x (2012).
Barbosa et al	Brazillian forest	34	34	545	6.23853					Barbosa, R. et al. Evidence of natural hybridization in Brazilian wild lineages of Saccharomyces cerevisiae. Genome Biology and Evolution 8, 317-329, doi:10.1093/gbe/evv263 (2016).
Dashko et al	Slovenia non-vineyard	33	33	357	9.2437					Dashko, S. et al. Changes in the Relative Abundance of Two Saccharomyces Species from Oak Forests to Wine Fermentations. Frontiers in Microbiology 2016; 7: 215, doi: 10.3389/fmicb.2016.00215 (2016)
Dashko et al	Slovenia vineyard	150	150	945	15.873					Dashko, S. et al. Changes in the Relative Abundance of Two Saccharomyces Species from Oak Forests to Wine Fermentations. Frontiers in Microbiology 2016; 7: 215, doi: 10.3389/fmicb.2016.00215 (2016)
Hyma and Fay	USA non-vineyard	228	117	434	26.9585	1300	17.5385			Hyma, K. E., and Fay, J. C. Mixing of vineyard and oak-tree ecotypes of Saccharomyces cerevisiae in North American vineyards. Molecular Ecology, 22(11): 2917–2930, doi: 10.1111/mec.12155 (2013)
Hyma and Fay	USA vineyard	163	114	809	14.0915	1803	9.04049			Hyma, K. E., and Fay, J. C. Mixing of vineyard and oak-tree ecotypes of Saccharomyces cerevisiae in North American vineyards. Molecular Ecology, 22(11): 2917–2930, doi: 10.1111/mec.12155 (2013)

## Sheet: S4
Supplemental Table S4. Isolation success rate for repeatedly sampled trees between two years
Source ID	Latitude	Longitude	Altitude	Host type	Host order	Host family	Host genus	Host species	Substrate	Time point 1 sample	Time point 1 Yeast isolate	Time point 1 Yeast isolate ID	Time point 1 Yeast isolate Medium	Time point 1 Isolation success: tree (%)	Time point 1 Isolation success: tree x substrate (%)	Time point 2 sample	Time point 2 Yeast isolate	Time point 2 Yeast isolate ID	Time point 2 Yeast isolate Medium	Time point 2 Isolation success: tree (%)	Time point 2 Isolation success: tree x substrate (%)	Time point 2 SRA accession of amplicon data
SPA0342	24.4046	121.362	1548	plant	Fagales	Fagaceae	Lithocarpus	Lithocarpus kawakamii	leaf	yes	yes	SPA0342	HS	100	16.6667	yes	yes	H342-1	HS	100	20	SRR17244533
SPA0342	24.4046	121.362	1548	plant	Fagales	Fagaceae	Lithocarpus	Lithocarpus kawakamii	twig	yes	no			100	16.6667	yes	no			100	20	SRR17244523
SPA0342	24.4046	121.362	1548	plant	Fagales	Fagaceae	Lithocarpus	Lithocarpus kawakamii	bark	yes	no			100	16.6667	yes	no			100	20	SRR17244464
SPA0342	24.4046	121.362	1548	plant	Fagales	Fagaceae	Lithocarpus	Lithocarpus kawakamii	soil	yes	no			100	16.6667	yes	no			100	20	SRR17244483
SPA0342	24.4046	121.362	1548	plant	Fagales	Fagaceae	Lithocarpus	Lithocarpus kawakamii	litter	yes	no			100	16.6667	yes	no			100	20	SRR17244503
SPA0342	24.4046	121.362	1548	plant	Fagales	Fagaceae	Lithocarpus	Lithocarpus kawakamii	fruit_abscission	yes	no			100	16.6667	no	no			NA	NA
SPA0344	24.4046	121.362	1566.4	plant	Fagales	Fagaceae	Lithocarpus	Lithocarpus kawakamii	leaf	yes	no			100	20	yes	no			100	20	SRR17244532
SPA0344	24.4046	121.362	1566.4	plant	Fagales	Fagaceae	Lithocarpus	Lithocarpus kawakamii	twig	yes	no			100	20	yes	no			100	20	SRR17244522
SPA0344	24.4046	121.362	1566.4	plant	Fagales	Fagaceae	Lithocarpus	Lithocarpus kawakamii	bark	yes	no			100	20	yes	no			100	20	SRR17244463
SPA0344	24.4046	121.362	1566.4	plant	Fagales	Fagaceae	Lithocarpus	Lithocarpus kawakamii	soil	yes	yes	SPA0344	HS	100	20	yes	yes	H344-7	HS	100	20	SRR17244482
SPA0344	24.4046	121.362	1566.4	plant	Fagales	Fagaceae	Lithocarpus	Lithocarpus kawakamii	litter	yes	no			100	20	yes	no			100	20	SRR17244502
SPA0346	24.4044	121.362	1572.4	plant	Rosales	Rosaceae	Eriobotrya	Eriobotrya deflexa	leaf	yes	no			0	0	yes	yes	H346-1	HS	100	20	SRR17244521
SPA0346	24.4044	121.362	1572.4	plant	Rosales	Rosaceae	Eriobotrya	Eriobotrya deflexa	twig	yes	no			0	0	yes	no			100	20	SRR17244520
SPA0346	24.4044	121.362	1572.4	plant	Rosales	Rosaceae	Eriobotrya	Eriobotrya deflexa	bark	yes	no			0	0	yes	no			100	20	SRR17244462
SPA0346	24.4044	121.362	1572.4	plant	Rosales	Rosaceae	Eriobotrya	Eriobotrya deflexa	soil	yes	no			0	0	yes	no			100	20	SRR17244481
SPA0346	24.4044	121.362	1572.4	plant	Rosales	Rosaceae	Eriobotrya	Eriobotrya deflexa	litter	yes	no			0	0	yes	no			100	20	SRR17244501
SPA0348	24.4042	121.362	1582.2	plant	Fagales	Fagaceae	Quercus	Quercus stenophylloides	leaf	yes	no			100	20	yes	no			100	20	SRR17244510
SPA0348	24.4042	121.362	1582.2	plant	Fagales	Fagaceae	Quercus	Quercus stenophylloides	twig	yes	no			100	20	yes	no			100	20	SRR17244519
SPA0348	24.4042	121.362	1582.2	plant	Fagales	Fagaceae	Quercus	Quercus stenophylloides	bark	yes	no			100	20	yes	no			100	20	SRR17244461
SPA0348	24.4042	121.362	1582.2	plant	Fagales	Fagaceae	Quercus	Quercus stenophylloides	soil	yes	no			100	20	yes	yes	H348-7	HS	100	20	SRR17244480
SPA0348	24.4042	121.362	1582.2	plant	Fagales	Fagaceae	Quercus	Quercus stenophylloides	litter	yes	yes	SPA0348	HS	100	20	yes	no			100	20	SRR17244500
SPA0356	24.4041	121.363	1590.4	plant	Apiales	Araliaceae	Fatsia	Fatsia polycarpa	leaf	yes	no			100	20	yes	no			0	0	SRR17244499
SPA0356	24.4041	121.363	1590.4	plant	Apiales	Araliaceae	Fatsia	Fatsia polycarpa	petiole	yes	no			100	20	yes	no			0	0	SRR17244479
SPA0356	24.4041	121.363	1590.4	plant	Apiales	Araliaceae	Fatsia	Fatsia polycarpa	bark	yes	no			100	20	yes	no			0	0	SRR17244460
SPA0356	24.4041	121.363	1590.4	plant	Apiales	Araliaceae	Fatsia	Fatsia polycarpa	soil	yes	yes	SPA0356	S	100	20	yes	no			0	0	SRR17244518
SPA0356	24.4041	121.363	1590.4	plant	Apiales	Araliaceae	Fatsia	Fatsia polycarpa	litter	yes	no			100	20	yes	no			0	0	SRR17244498
SPA0357	24.4041	121.363	1590.4	plant	Rosales	Cannabaceae	Celtis	Celtis sinensis	leaf	yes	no			0	0	yes	no			0	0	SRR17244488
SPA0357	24.4041	121.363	1590.4	plant	Rosales	Cannabaceae	Celtis	Celtis sinensis	twig	yes	no			0	0	yes	no			0	0	SRR17244517
SPA0357	24.4041	121.363	1590.4	plant	Rosales	Cannabaceae	Celtis	Celtis sinensis	bark	yes	no			0	0	yes	no			0	0	SRR17244459
SPA0357	24.4041	121.363	1590.4	plant	Rosales	Cannabaceae	Celtis	Celtis sinensis	soil	yes	no			0	0	yes	no			0	0	SRR17244478
SPA0357	24.4041	121.363	1590.4	plant	Rosales	Cannabaceae	Celtis	Celtis sinensis	litter	yes	no			0	0	yes	no			0	0	SRR17244497
SPA0358	24.4042	121.363	1590.1	plant	Ericales	Symplocaceae	Symplocos	Symplocos lancifolia	leaf	yes	no			0	0	yes	no			0	0	SRR17244477
SPA0358	24.4042	121.363	1590.1	plant	Ericales	Symplocaceae	Symplocos	Symplocos lancifolia	twig	yes	no			0	0	yes	no			0	0	SRR17244516
SPA0358	24.4042	121.363	1590.1	plant	Ericales	Symplocaceae	Symplocos	Symplocos lancifolia	bark	yes	no			0	0	yes	no			0	0	SRR17244458
SPA0358	24.4042	121.363	1590.1	plant	Ericales	Symplocaceae	Symplocos	Symplocos lancifolia	soil	yes	no			0	0	yes	no			0	0	SRR17244476
SPA0358	24.4042	121.363	1590.1	plant	Ericales	Symplocaceae	Symplocos	Symplocos lancifolia	litter	yes	no			0	0	yes	no			0	0	SRR17244496
SPA0359	24.4041	121.363	1592	plant	Laurales	Lauraceae	Litsea	Litsea acuminata	leaf	yes	no			100	20	yes	yes	H359-1	HS	100	20	SRR17244466
SPA0359	24.4041	121.363	1592	plant	Laurales	Lauraceae	Litsea	Litsea acuminata	twig	yes	yes	SPA0359	S	100	20	yes	no			100	20	SRR17244515
SPA0359	24.4041	121.363	1592	plant	Laurales	Lauraceae	Litsea	Litsea acuminata	bark	yes	no			100	20	yes	no			100	20	SRR17244457
SPA0359	24.4041	121.363	1592	plant	Laurales	Lauraceae	Litsea	Litsea acuminata	soil	yes	no			100	20	yes	no			100	20	SRR17244475
SPA0359	24.4041	121.363	1592	plant	Laurales	Lauraceae	Litsea	Litsea acuminata	litter	yes	no			100	20	yes	no			100	20	SRR17244495
SPA0408	24.4042	121.363	1603.68	plant	Laurales	Lauraceae	Litsea	Litsea acuminata	leaf	NA	NA			NA	NA	yes	no			0	0	SRR17244455
SPA0408	24.4042	121.363	1603.68	plant	Laurales	Lauraceae	Litsea	Litsea acuminata	twig	NA	NA			NA	NA	yes	no			0	0	SRR17244514
SPA0408	24.4042	121.363	1603.68	plant	Laurales	Lauraceae	Litsea	Litsea acuminata	bark	NA	NA			NA	NA	yes	no			0	0	SRR17244456
SPA0408	24.4042	121.363	1603.68	plant	Laurales	Lauraceae	Litsea	Litsea acuminata	soil	NA	NA			NA	NA	yes	no			0	0	SRR17244474
SPA0408	24.4042	121.363	1603.68	plant	Laurales	Lauraceae	Litsea	Litsea acuminata	litter	NA	NA			NA	NA	yes	no			0	0	SRR17244494
SPA0411	24.4041	121.363	1601.46	plant	Laurales	Lauraceae	Litsea	Litsea acuminata	leaf	NA	NA			NA	NA	yes	no			100	20	SRR17244444
SPA0411	24.4041	121.363	1601.46	plant	Laurales	Lauraceae	Litsea	Litsea acuminata	twig	NA	NA			NA	NA	yes	no			100	20	SRR17244513
SPA0411	24.4041	121.363	1601.46	plant	Laurales	Lauraceae	Litsea	Litsea acuminata	bark	NA	NA			NA	NA	yes	no			100	20	SRR17244454
SPA0411	24.4041	121.363	1601.46	plant	Laurales	Lauraceae	Litsea	Litsea acuminata	soil	NA	NA			NA	NA	yes	no			100	20	SRR17244473
SPA0411	24.4041	121.363	1601.46	plant	Laurales	Lauraceae	Litsea	Litsea acuminata	litter	NA	NA			NA	NA	yes	yes	H411-8	HS	100	20	SRR17244493
SPA0413	24.404	121.363	1604.17	plant	Apiales	Araliaceae	Fatsia	Fatsia polycarpa	leaf	NA	NA			NA	NA	yes	no			100	20	SRR17244531
SPA0413	24.404	121.363	1604.17	plant	Apiales	Araliaceae	Fatsia	Fatsia polycarpa	bark	NA	NA			NA	NA	yes	no			100	20	SRR17244453
SPA0413	24.404	121.363	1604.17	plant	Apiales	Araliaceae	Fatsia	Fatsia polycarpa	soil	NA	NA			NA	NA	yes	no			100	20	SRR17244472
SPA0413	24.404	121.363	1604.17	plant	Apiales	Araliaceae	Fatsia	Fatsia polycarpa	litter	NA	NA			NA	NA	yes	yes	H413-8	HS	100	20	SRR17244492
SPA0413	24.404	121.363	1604.17	plant	Apiales	Araliaceae	Fatsia	Fatsia polycarpa	petiole	NA	NA			NA	NA	yes	no			100	20	SRR17244512
SPA0414	24.404	121.363	1604.86	plant	Fagales	Fagaceae	Lithocarpus	Lithocarpus kawakamii	leaf	NA	NA			NA	NA	yes	no			100	20	SRR17244530
SPA0414	24.404	121.363	1604.86	plant	Fagales	Fagaceae	Lithocarpus	Lithocarpus kawakamii	twig	NA	NA			NA	NA	yes	no			100	20	SRR17244511
SPA0414	24.404	121.363	1604.86	plant	Fagales	Fagaceae	Lithocarpus	Lithocarpus kawakamii	bark	NA	NA			NA	NA	yes	no			100	20	SRR17244452
SPA0414	24.404	121.363	1604.86	plant	Fagales	Fagaceae	Lithocarpus	Lithocarpus kawakamii	soil	NA	NA			NA	NA	yes	no			100	20	SRR17244471
SPA0414	24.404	121.363	1604.86	plant	Fagales	Fagaceae	Lithocarpus	Lithocarpus kawakamii	litter	NA	NA			NA	NA	yes	yes	H414-8	HS	100	20	SRR17244491
SPA0415	24.404	121.363	1608.52	plant	Laurales	Lauraceae	Litsea	Litsea acuminata	leaf	NA	NA			NA	NA	yes	no			100	20	SRR17244529
SPA0415	24.404	121.363	1608.52	plant	Laurales	Lauraceae	Litsea	Litsea acuminata	twig	NA	NA			NA	NA	yes	no			100	20	SRR17244509
SPA0415	24.404	121.363	1608.52	plant	Laurales	Lauraceae	Litsea	Litsea acuminata	bark	NA	NA			NA	NA	yes	no			100	20	SRR17244451
SPA0415	24.404	121.363	1608.52	plant	Laurales	Lauraceae	Litsea	Litsea acuminata	soil	NA	NA			NA	NA	yes	no			100	20	SRR17244470
SPA0415	24.404	121.363	1608.52	plant	Laurales	Lauraceae	Litsea	Litsea acuminata	litter	NA	NA			NA	NA	yes	yes	H415-8	HS	100	20	SRR17244490
SPA0416	24.4039	121.363	1609.26	plant	Laurales	Lauraceae	Actinodaphne	Actinodaphne mushaensis	leaf	NA	NA			NA	NA	yes	no			100	20	SRR17244528
SPA0416	24.4039	121.363	1609.26	plant	Laurales	Lauraceae	Actinodaphne	Actinodaphne mushaensis	twig	NA	NA			NA	NA	yes	no			100	20	SRR17244508
SPA0416	24.4039	121.363	1609.26	plant	Laurales	Lauraceae	Actinodaphne	Actinodaphne mushaensis	bark	NA	NA			NA	NA	yes	no			100	20	SRR17244450
SPA0416	24.4039	121.363	1609.26	plant	Laurales	Lauraceae	Actinodaphne	Actinodaphne mushaensis	soil	NA	NA			NA	NA	yes	no			100	20	SRR17244469
SPA0416	24.4039	121.363	1609.26	plant	Laurales	Lauraceae	Actinodaphne	Actinodaphne mushaensis	litter	NA	NA			NA	NA	yes	yes	H416-8	HS	100	20	SRR17244489
SPA0417	24.404	121.363	1611.61	plant	Dipsacales	Adoxaceae	Viburnum	Viburnum arboricolum	leaf	NA	NA			NA	NA	yes	no			0	0	SRR17244527
SPA0417	24.404	121.363	1611.61	plant	Dipsacales	Adoxaceae	Viburnum	Viburnum arboricolum	twig	NA	NA			NA	NA	yes	no			0	0	SRR17244507
SPA0417	24.404	121.363	1611.61	plant	Dipsacales	Adoxaceae	Viburnum	Viburnum arboricolum	bark	NA	NA			NA	NA	yes	no			0	0	SRR17244449
SPA0417	24.404	121.363	1611.61	plant	Dipsacales	Adoxaceae	Viburnum	Viburnum arboricolum	soil	NA	NA			NA	NA	yes	no			0	0	SRR17244468
SPA0417	24.404	121.363	1611.61	plant	Dipsacales	Adoxaceae	Viburnum	Viburnum arboricolum	litter	NA	NA			NA	NA	yes	no			0	0	SRR17244487
SPA0418	24.404	121.363	1614.07	plant	Laurales	Lauraceae	Machilus	Machilus zuihoensis var. mushaensis	leaf	NA	NA			NA	NA	yes	no			100	20	SRR17244526
SPA0418	24.404	121.363	1614.07	plant	Laurales	Lauraceae	Machilus	Machilus zuihoensis var. mushaensis	twig	NA	NA			NA	NA	yes	no			100	20	SRR17244506
SPA0418	24.404	121.363	1614.07	plant	Laurales	Lauraceae	Machilus	Machilus zuihoensis var. mushaensis	bark	NA	NA			NA	NA	yes	no			100	20	SRR17244448
SPA0418	24.404	121.363	1614.07	plant	Laurales	Lauraceae	Machilus	Machilus zuihoensis var. mushaensis	soil	NA	NA			NA	NA	yes	yes	H418-7	HS	100	20	SRR17244467
SPA0418	24.404	121.363	1614.07	plant	Laurales	Lauraceae	Machilus	Machilus zuihoensis var. mushaensis	litter	NA	NA			NA	NA	yes	no			100	20	SRR17244486
SPA0419	24.4039	121.363	1614.44	plant	Apiales	Araliaceae	Fatsia	Fatsia polycarpa	leaf	NA	NA			NA	NA	yes	no			0	0	SRR17244525
SPA0419	24.4039	121.363	1614.44	plant	Apiales	Araliaceae	Fatsia	Fatsia polycarpa	bark	NA	NA			NA	NA	yes	no			0	0	SRR17244447
SPA0419	24.4039	121.363	1614.44	plant	Apiales	Araliaceae	Fatsia	Fatsia polycarpa	litter	NA	NA			NA	NA	yes	no			0	0	SRR17244485
SPA0419	24.4039	121.363	1614.44	plant	Apiales	Araliaceae	Fatsia	Fatsia polycarpa	petiole	NA	NA			NA	NA	yes	no			0	0	SRR17244505
SPA0420	24.4039	121.363	1615.74	plant	Laurales	Lauraceae	Machilus	Machilus japonica	leaf	NA	NA			NA	NA	yes	no			100	20	SRR17244524
SPA0420	24.4039	121.363	1615.74	plant	Laurales	Lauraceae	Machilus	Machilus japonica	twig	NA	NA			NA	NA	yes	no			100	20	SRR17244504
SPA0420	24.4039	121.363	1615.74	plant	Laurales	Lauraceae	Machilus	Machilus japonica	bark	NA	NA			NA	NA	yes	no			100	20	SRR17244446
SPA0420	24.4039	121.363	1615.74	plant	Laurales	Lauraceae	Machilus	Machilus japonica	soil	NA	NA			NA	NA	yes	no			100	20	SRR17244465
SPA0420	24.4039	121.363	1615.74	plant	Laurales	Lauraceae	Machilus	Machilus japonica	litter	NA	NA			NA	NA	yes	yes	H420-8	HS	100	20	SRR17244484

## Sheet: S5
Supplemental Table S5. Bioclimatic variables, number of grid cells with or without yeast isolates, and p-values
Bioclimatic variables	Grids with isolates recovered (n)	Grids without isolate recovered (n)	P values	Adjusted P values (Bonferroni)
Longitude	25	88	0.0921189	1
Latitude	25	88	0.0743218	1
Altitude	25	88	0.797992	1
Annual Mean Temperature (C)	24	88	0.462869	1
Mean Diurnal Range (C)	24	88	0.463769	1
Isothermality	24	88	0.875991	1
Temperature Seasonality (standard deviation)	24	88	0.491559	1
Max Temperature of Warmest Month (C)	24	88	0.971711	1
Min Temperature of Coldest Month (C)	24	88	0.44151	1
Temperature Annual Range (C)	24	88	0.480134	1
Mean Temperature of Wettest Quarter (C)	24	88	0.143939	1
Mean Temperature of Driest Quarter (C)	24	88	0.784825	1
Mean Temperature of Warmest Quarter (C)	24	88	0.983025	1
Mean Temperature of Coldest Quarter (C)	24	88	0.322375	1
Annual Precipitation (mm/year)	24	88	0.686074	1
Precipitation of Wettest Month (mm/month)	24	88	0.839836	1
Precipitation of Driest Month (mm/month)	24	88	0.482579	1
Precipitation Seasonality (coefficient of variation)	24	88	0.504722	1
Precipitation of Wettest Quarter (mm/quarter)	24	88	0.814981	1
Precipitation of Driest Quarter (mm/quarter)	24	88	0.420899	1
Precipitation of Warmest Quarter (mm/quarter)	24	88	0.429142	1
Precipitation of Coldest Quarter (mm/quarter)	24	88	0.319105	1

## Sheet: S6
Supplemental Table S6. Details on the 340 isolates used in this study, including previously published genomes.
Yeast isolate ID[1]	Source ID in this study	Study[2]	Location Description	Sequencing coverage	Ploidy[3]	Nanopore assembly available	Phenotyping_assay_Temperature(°C)	Heterozygosity	Representative isolate [Yes / No]	Clonal group	Number of clones in this group [n]	Clonal isolate(pairs<1800 SNPs)[4]	Latitude	Longitude	Altitude	Host type	Host order	Host family	Host genus	Yeast isolate number	Substrate isolated	Medium used in isolation	Lineage assigned at Admixture K=16	Lineage assigned at Admixture K=29	SRA accession
ERR1111486	REF01416	Barbosa et al., 2015	Brazil, Tocantins: Buritizal	68.4676				3.16452e-05				NA	-12.3849	-46.5933		Environment							NA	NA
ERR1111487	REF01394	Barbosa et al., 2015	Brazil, Tocantins: Buritizal	25.2165				7.19059e-05				NA	-12.3849	-46.5933		Plant	Sapindales	Anacardiaceae	Tapirira				Brazilian;	Brazilian;
ERR1111488	REF01395	Barbosa et al., 2015	Brazil, Tocantins: Buritizal	61.1106				8.86398e-05				ERR1111489,ERR1111497,	-10.1753	-48.2982		Plant	Sapindales	Anacardiaceae	Tapirira				Brazilian;	Brazilian;
ERR1111489	REF01397	Barbosa et al., 2015	Brazil, Tocantins: Buritizal	41.6154				8.82256e-05				ERR1111497,ERR1111488	-14.5746	-50.495		Plant	Sapindales	Anacardiaceae	Tapirira				Brazilian;	Brazilian;
ERR1111490	REF01399	Barbosa et al., 2015	Brazil, Roraima, Mucajaí	39.6059				6.52787e-05				NA	-14.5746	-50.495		Fungus							Brazilian;	Brazilian;
ERR1111491	REF01400	Barbosa et al., 2015	Brazil, Roraima, Mucajaí	45.9758				5.14442e-05				NA	-14.5746	-50.495		Fungus							Brazilian;	Brazilian;
ERR1111492	REF01402	Barbosa et al., 2015	Brazil, Roraima, Mucajaí	47.8396				4.93732e-05				NA	-24.7833	-51.0833		Plant							Brazilian;	Brazilian;
ERR1111493	REF01411	Barbosa et al., 2015	Brazil, Tocantins, Taquarussu	34.784				3.46275e-05				NA	-24.7833	-51.0833		Plant	Sapindales	Anacardiaceae	Tapirira				NA	NA
ERR1111494	REF01352	Barbosa et al., 2015	Brazil, Amazonas	37.9395				3.39648e-05				NA	-24.7833	-51.0833		Environment							NA	NA
ERR1111495	REF01414	Barbosa et al., 2015	Brazil, Tocantins, Taguatinga	39.7727				3.95151e-05				ERR1111496,	-10.2673	-48.2071		Plant	Sapindales	Anacardiaceae	Tapirira				NA	NA
ERR1111496	REF01415	Barbosa et al., 2015	Brazil, Tocantins, Taguatinga	24.5936				4.12548e-05				ERR1111495	-10.2673	-48.2071		Plant	Sapindales	Anacardiaceae	Tapirira				NA	NA
ERR1111497	REF01405	Barbosa et al., 2015	Brazil, Tocantins, Taquarussu	29.6346				0.000190286				ERR1111488,ERR1111489	-10.2673	-48.2071		Plant	Sapindales	Anacardiaceae	Tapirira				Brazilian;	Brazilian;
ERR1111498	REF01406	Barbosa et al., 2015	Brazil, Tocantins, Taquarussu	27.8736				9.80837e-05				ERR1111499,	-10.2673	-48.2071		Plant	Sapindales	Anacardiaceae	Tapirira				Brazilian;	Brazilian;
ERR1111499	REF01407	Barbosa et al., 2015	Brazil, Tocantins, Taquarussu	22.9665				9.96577e-05				ERR1111498	-10.2673	-48.2071		Plant	Sapindales	Anacardiaceae	Tapirira				Brazilian;	Brazilian;
ERR1111500	REF01408	Barbosa et al., 2015	Brazil, Tocantins, Taquarussu	19.7973				6.93379e-05				ERR1111501,	-3.46531	-62.2159		Plant	Sapindales	Anacardiaceae	Tapirira				Brazilian;	Brazilian;
ERR1111501	REF01409	Barbosa et al., 2015	Brazil, Tocantins, Dianapolis	20.9478				6.61071e-05				ERR1111500	-11.6244	-46.8202		Plant	Sapindales	Anacardiaceae	Tapirira				Brazilian;	Brazilian;
BJ10	REF01110	Duan et al., 2018	China, Beijing, Miyun: Xinchengzi, Wuling Mountain	100.947				2.84973e-05				BJ11,BJ13,BJ9	40.6342	117.404		Plant	Rosales	Ulmaceae	Ulmus		bark		CHN-VIII;	CHN-VIII;
BJ11	REF01111	Duan et al., 2018	China, Beijing, Miyun: Xinchengzi, Wuling Mountain	158.464				3.91838e-05				BJ13,BJ9,BJ10	40.6342	117.404		Plant					rotten wood		CHN-VIII;	CHN-VIII;
BJ13	REF01112	Duan et al., 2018	China, Beijing, Miyun: Xinchengzi, Wuling Mountain	241.148				2.75032e-05				BJ9,BJ10,BJ11	40.6342	117.404		Plant					rotten wood		CHN-VIII;	CHN-VIII;
BJ14	REF01041	Duan et al., 2018	China, Beijing, Miyun: Xinchengzi, Wuling Mountain	74.3042				7.32314e-05				NA	40.6342	117.404		Environment					soil		CHN-IVa	CHN-IVa
BJ15	REF01042	Duan et al., 2018	China, Beijing, Lingshui: Dongling Mountain	107.532				5.60833e-05				NA	39.9042	116.407		Plant	Fagales	Fagaceae	Quercus		bark		CHN-IVa	CHN-IVa
BJ18	REF01045	Duan et al., 2018	China, Beijing, Lingshui: Dongling Mountain	101.678				4.01779e-05				NA	39.9042	116.407		Plant	Fagales	Fagaceae	Quercus		bark		CHN-IVa	CHN-IVa
BJ19	REF01046	Duan et al., 2018	China, Beijing, Lingshui: Dongling Mountain	246.402				3.23908e-05				NA	39.9042	116.407		Plant	Fagales	Fagaceae	Quercus		bark		CHN-IVa	CHN-IVa
BJ2	REF01107	Duan et al., 2018	China, Beijing, Shunyi	140.601				5.99768e-05				NA	40.1303	116.655		Plant	Rosales	Rosaceae	Malus		fruit		CHN-VIII;	CHN-VIII;
BJ21	REF01048	Duan et al., 2018	China, Beijing, Lingshui: Dongling Mountain	112.911				3.30535e-05				NA	39.9042	116.407		Plant	Fagales	Juglandaceae	Carya		bark		CHN-IVa	CHN-IVa
BJ22	REF01049	Duan et al., 2018	China, Beijing, Lingshui: Dongling Mountain	73.3532				3.62015e-05				NA	39.9042	116.407		Plant	Fagales	Juglandaceae	Carya		bark		CHN-IVa	CHN-IVa
BJ23	REF01050	Duan et al., 2018	China, Beijing, Lingshui: Dongling Mountain	93.6028				3.27222e-05				ERR1308953,	39.9042	116.407		Plant	Rosales	Ulmaceae	Ulmus		bark		CHN-IVa	CHN-IVa
BJ24	REF01051	Duan et al., 2018	China, Beijing, Lingshui: Dongling Mountain	122.089				3.20594e-05				NA	39.9042	116.407		Plant	Rosales	Ulmaceae	Ulmus		bark		CHN-IVa	CHN-IVa
BJ3	REF01038	Duan et al., 2018	China, Beijing, Shunyi	158.989				3.09825e-05				BJ6,	40.1303	116.655		Plant	Vitales	Vitaceae	Vitis		fruit		CHN-IVa	CHN-IVa
BJ4	REF01082	Duan et al., 2018	China, Beijing, Haidian	92.3447				3.37163e-05				NA	39.96	116.298		Animal		Lepiodoptera			intestine		CHN-III;CHN-VI/VII.1	CHN-VI/VII.1;
BJ5	REF01108	Duan et al., 2018	China, Beijing, Miyun: Xinchengzi, Wuling Mountain	111.496				2.51836e-05				NA	40.6342	117.404		Plant	Rosales	Rosaceae	Malus		fruit		CHN-VIII;	CHN-VIII;
BJ6	REF01039	Duan et al., 2018	China, Beijing, Changping	103.292				3.06511e-05				BJ3	40.2207	116.231		Plant	Ericales	Ebenaceae	Diospyros		fruit		CHN-IVa	CHN-IVa
BJ7	REF01083	Duan et al., 2018	China, Beijing, Shunyi	222.88				2.916e-05				NA	40.1303	116.655		Plant	Rosales	Amygdaloideae	Pyrus		bark		CHN-VI/VII.2;	TW3a;CHN-VI/VII.2a
BJ9	REF01109	Duan et al., 2018	China, Beijing, Miyun: Xinchengzi, Wuling Mountain	96.7663				3.92666e-05				BJ10,BJ11,BJ13,	40.6342	117.404		Plant	Rosales	Ulmaceae	Ulmus		bark		CHN-VIII;	CHN-VIII;
BQ8.2	REF01237	Duan et al., 2018	China, Sichuan, Leshan	128.322				0.000320263				BTP1,HN3.8,	29.5441	103.772		Fermentation					Huangjiu starter		NA	NA
BT1.1	REF01144	Duan et al., 2018	China, Inner Mongolia, Baotou	108.63				0.00240197				BT2.6,BT2.8,BT3,BT4,	40.658	109.84		Fermentation					fermenting dough		NA	NA
BT2.6	REF01145	Duan et al., 2018	China, Inner Mongolia, Baotou	226.644				0.00230704				BT2.8,BT3,BT4,BT1.1	40.658	109.84		Fermentation					fermenting dough		NA	NA
BT2.8	REF01146	Duan et al., 2018	China, Inner Mongolia, Baotou	179.623				0.00240727				BT3,BT4,BT1.1,BT2.6	40.658	109.84		Fermentation					fermenting dough		NA	NA
BT3	REF01147	Duan et al., 2018	China, Inner Mongolia, Baotou	176.004				0.00189938				BT4,BT1.1,BT2.6,BT2.8	40.658	109.84		Fermentation					fermenting dough		NA	NA
BT4	REF01148	Duan et al., 2018	China, Inner Mongolia, Baotou	174.206				0.00240636				BT1.1,BT2.6,BT2.8,BT3	40.658	109.84		Fermentation					fermenting dough		NA	NA
BTP1	REF01238	Duan et al., 2018	China, Shandong, Yantai	189.919				0.000392252				HN3.8,BQ8.2	37.4645	121.448		Fermentation					fermenting rice		NA	NA
CQJZ1.4	REF01239	Duan et al., 2018	China, Zhejiang	92.9529				3.14796e-05				NA	29.9958	120.586		Fermentation					fermenting rice		NA	NA
FJ11	REF01062	Duan et al., 2018	China, Fujian, Wuyishan: Wuyi Mountain	135.838				3.27222e-05				NA	27.9064	117.894		Plant	Fagales	Myricaceae	Myrica		fruit		CHN-X;Malaysian	CHN-X;
FJ12	REF01086	Duan et al., 2018	China, Fujian, Wuyishan: Wuyi Mountain	139.977				3.13967e-05				NA	27.9064	117.894		Plant	Rosales	Rosaceae	Prunus		fruit		CHN-VI/VII.2;	TW3a;CHN-VI/VII.2a
FJ2	REF01069	Duan et al., 2018	China, Fujian, Wuyishan: Wuyi Mountain	131.519				3.5953e-05				NA	27.9064	117.894		Plant	Fagales	Fagaceae	Castanea		bark		TW2;CHN-V	CHN-V;
FJ3	REF01070	Duan et al., 2018	China, Fujian, Wuyishan: Wuyi Mountain	177.078				3.04026e-05				NA	27.9064	117.894		Plant	Fagales	Fagaceae	Castanea		bark		TW2;CHN-V	CHN-V;
FJ5	REF01018	Duan et al., 2018	China, Fujian, Wuyishan: Wuyi Mountain	141.346				2.44381e-05				NA	27.9064	117.894		Plant	Fagales	Fagaceae	Castanea		bark		CHN-I;	CHN-I;
FJ6	REF01072	Duan et al., 2018	China, Fujian, Wuyishan: Wuyi Mountain	128.213				3.09825e-05				NA	27.9064	117.894		Plant	Rosales	Rosaceae	Prunus		bark		TW2;CHN-V	CHN-V;
FJ7	REF01019	Duan et al., 2018	China, Fujian, Wuyishan: Wuyi Mountain	169.441				2.35268e-05				FJ8,FJ9,	27.9064	117.894		Plant	Rosales	Rhamnaceae	Hovenia		bark		CHN-I;	CHN-I;
FJ8	REF01020	Duan et al., 2018	China, Fujian, Wuyishan: Wuyi Mountain	104.685				2.47694e-05				FJ9,FJ7	27.9064	117.894		Plant	Fagales	Fagaceae	Cyclobalanopsis		bark		CHN-I;	CHN-I;
FJ9	REF01021	Duan et al., 2018	China, Fujian, Wuyishan: Wuyi Mountain	206.837				2.41067e-05				,FJ7,FJ8	27.9064	117.894		Plant	Fagales	Fagaceae	Castanopsis		bark		CHN-I;	CHN-I;
FJSA40.2	REF01063	Duan et al., 2018	China, Guizhou, Tongren: Fanjing Mountain	103.498				2.79174e-05				NA	27.9203	108.69		Plant					bark		CHN-X;Malaysian	CHN-X;
GT39.1	REF01064	Duan et al., 2018	China, Zhejiang	177.913				2.45209e-05				NA	29.2552	118.155		Plant					bark		CHN-X;Malaysian	CHN-X;
GT99.1	REF01065	Duan et al., 2018	China, Zhejiang	131.927				2.41896e-05				NA	29.2552	118.155		Plant					bark		CHN-X;Malaysian	CHN-X;
GZLJ3.1	REF01218	Duan et al., 2018	China, Guizhou, Qiannan Buyei and Miao Autonomous Prefecture: Changshun	204.951				0.000683852				NA	26.0226	106.452		Fermentation					fermented sorghum grain		NA	NA
GZLJ3.19	REF01219	Duan et al., 2018	China, Guizhou, Qiannan Buyei and Miao Autonomous Prefecture: Changshun	167.413				0.000663059				GZLJ3.30,	26.0226	106.452		Fermentation					fermented sorghum grain		NA	NA
GZLJ3.30	REF01221	Duan et al., 2018	China, Guizhou, Qiannan Buyei and Miao Autonomous Prefecture: Changshun	159.14				0.000713426				,GZLJ3.19	26.0226	106.452		Fermentation					fermented sorghum grain		NA	NA
HLJ2	REF01087	Duan et al., 2018	China, Heilongjiang, Mudanjiang: Ningan, Jingbo lake	143.91				3.08997e-05				HLJ3,	43.8544	128.911		Plant	Fagales	Fagaceae	Quercus		bark		CHN-VI/VII.2;	CHN-IVb;CHN-VI/VII.2b
HLJ201	REF01224	Duan et al., 2018	China, Heilongjiang, Qiqihaer	90.4889				0.00115207				HLJ225,HLJ4,HLJ59,	47.3543	123.918		Fermentation					fermented sorghum grain		NA	NA
HLJ225	REF01225	Duan et al., 2018	China, Heilongjiang, Qiqihaer	90.4141				0.00103601				HLJ4,HLJ59,HLJ201	47.3543	123.918		Fermentation					fermented sorghum grain		NA	NA
HLJ3	REF01088	Duan et al., 2018	China, Heilongjiang, Mudanjiang: Ningan, Jingbo lake	97.6717				2.88286e-05				,HLJ2	43.8544	128.911		Plant	Fagales	Fagaceae	Quercus		bark		CHN-VI/VII.2;	CHN-IVb;CHN-VI/VII.2b
HLJ4	REF01226	Duan et al., 2018	China, Heilongjiang, Qiqihaer	120.727				0.00129605				HLJ59,HLJ201,HLJ225	47.3543	123.918		Fermentation					fermented sorghum grain		NA	NA
HLJ59	REF01227	Duan et al., 2018	China, Heilongjiang, Qiqihaer	189.189				0.00115273				,HLJ201,HLJ225,HLJ4	47.3543	123.918		Fermentation					fermented sorghum grain		NA	NA
HN11	REF01060	Duan et al., 2018	China, Hainan, Ledong: Jianfengling Mountain	161.096				2.99884e-05				HN19,HN8,HN9,ERR1308663	18.715	108.875		Plant					rotten wood		CHN-III;CHN-VI/VII.1	CHN-III;
HN16	REF01076	Duan et al., 2018	China, Hainan, Qiongzhong: Wuzhi Mountain	89.2289				3.42133e-05				NA	18.8983	109.704		Environment					soil		TW2;CHN-V	CHN-V;
HN17	REF01077	Duan et al., 2018	China, Hainan, Qiongzhong: Wuzhi Mountain	158.522				3.16452e-05				HN18,	18.8983	109.704		Plant	Fagales	Fagaceae			bark		TW2;CHN-V	CHN-V;
HN18	REF01078	Duan et al., 2018	China, Hainan, Qiongzhong: Wuzhi Mountain	146.238				3.47932e-05				,HN17	18.8983	109.704		Plant	Fagales	Fagaceae			bark		TW2;CHN-V	CHN-V;
HN19	REF01061	Duan et al., 2018	China, Hainan, Qiongzhong: Wuzhi Mountain	146.701				3.14796e-05				HN8,HN9,ERR1308663,HN11	18.8983	109.704		Plant	Fagales	Fagaceae			bark		CHN-III;CHN-VI/VII.1	CHN-III;
HN2	REF01024	Duan et al., 2018	China, Hainan, Lingshui: Diaoluo Mountain	142.598				2.49351e-05				HN3,	18.7285	109.83		Plant					rotten wood		CHN-I;	CHN-I;
HN3	REF01025	Duan et al., 2018	China, Hainan, Lingshui: Diaoluo Mountain	108.965				2.17043e-05				,HN2	18.7285	109.83		Plant					rotten wood		CHN-I;	CHN-I;
HN3.8	REF01240	Duan et al., 2018	China, Henan, Xuchang	183.985				0.000341967				,BQ8.2,BTP1	34.0358	113.852		Fermentation					fermenting dough		NA	NA
HN4	REF01026	Duan et al., 2018	China, Hainan, Changjiang: Bawangling Mountain	87.4149				2.79174e-05				HN5,ERR1308996	19.1212	109.083		Plant					rotten wood		CHN-I;	CHN-I;
HN5	REF01027	Duan et al., 2018	China, Hainan, Changjiang: Bawangling Mountain	157.467				2.5018e-05				,ERR1308996,HN4	19.1212	109.083		Plant					rotten wood		CHN-I;	CHN-I;
HN7	REF01029	Duan et al., 2018	China, Hainan, Changjiang: Bawangling Mountain	138.944				2.09588e-05				NA	19.1212	109.083		Plant					rotten wood		CHN-I;	CHN-I;
HN8	REF01057	Duan et al., 2018	China, Hainan, Qiongzhong: Wuzhi Mountain	144.244				3.01541e-05				HN9,ERR1308663,HN11,HN19	18.8983	109.704		Plant					rotten wood		CHN-III;CHN-VI/VII.1	CHN-III;
HN9	REF01058	Duan et al., 2018	China, Hainan, Qiongzhong: Wuzhi Mountain	125.572				3.13967e-05				,ERR1308663,HN11,HN19,HN8	18.8983	109.704		Plant					rotten wood		CHN-III;CHN-VI/VII.1	CHN-III;
HQ1.1	REF01241	Duan et al., 2018	China, Fujian, Ningde: Gutian	152.035				0.000721793				NA	26.5778	118.746		Fermentation					Huangjiu starter		NA	NA
JL4	REF01089	Duan et al., 2018	China, Jilin, Yanbian Korean Autonomous Prefecture	177.024				3.44618e-05				NA	42.9094	129.472		Plant	Rosales	Amygdaloideae	Pyrus		bark		CHN-VI/VII.2;	CHN-IVb;CHN-VI/VII.2b
JM32.3	REF01243	Duan et al., 2018	China, Hunan	117.615				2.12901e-05				NA	26.4204	111.613		Fermentation					Huangjiu starter		NA	NA
JXXY1.1	REF01067	Duan et al., 2018	China, Hubei	174.628				3.24736e-05				NA	31.4709	110.394		Plant					bark		CHN-X;Malaysian	CHN-X;
JXXY10.1	REF01012	Duan et al., 2018	China, Hubei	188.083				3.4379e-05				JXXY16.1,	31.4709	110.394		Plant					bark		TW1;CHN-IX	CHN-IX;
JXXY16.1	REF01013	Duan et al., 2018	China, Hubei, Shennongjia: Xiangxiyuan	201.065				3.50417e-05				,JXXY10.1	31.4709	110.394		Plant					bark		TW1;CHN-IX	CHN-IX;
NGS21L.1	REF01068	Duan et al., 2018	China, HubeiNangong Mountain	172.143				2.30298e-05				NA	30.4237	110.991		Plant					bark		CHN-X;Malaysian	CHN-X;
SD1	REF01090	Duan et al., 2018	China, Shandong, Weifang: Anqiu	108.158				3.13139e-05				NA	36.4785	119.219		Plant	Ericales	Ebenaceae	Diospyros		fruit		CHN-III;CHN-VI/VII.1	CHN-VI/VII.1;
SD2	REF01091	Duan et al., 2018	China, Shandong, Taian	172.755				3.96808e-05				NA	36.2003	117.088		Plant	Fagales	Fagaceae	Quercus		bark		CHN-III;CHN-VI/VII.1	CHN-VI/VII.1;
SD3	REF01092	Duan et al., 2018	China, Shandong, Taian	80.4525				3.15624e-05				NA	36.2003	117.088		Plant	Fagales	Fagaceae	Quercus		bark		CHN-VI/VII.2;	TW3a;CHN-VI/VII.2a
SX1	REF01030	Duan et al., 2018	China, Shaanxi, Baoji: Fengxian, Qinling Mountain	90.7259				2.96571e-05				SX2,SX5,	34.2153	106.9		Plant	Fagales	Fagaceae			bark		CHN-II;	CHN-II;
SX10	REF01093	Duan et al., 2018	China, Shaanxi, Baoji: Fengxian, Qinling Mountain	182.879				3.62843e-05				NA	34.2153	106.9		Plant	Ericales	Ebenaceae	Diospyros		fruit		CHN-III;CHN-VI/VII.1	CHN-VI/VII.1;
SX2	REF01031	Duan et al., 2018	China, Shaanxi, Baoji: Fengxian, Qinling Mountain	141.166				4.05092e-05				SX5,SX1	34.2153	106.9		Plant	Fagales	Fagaceae			bark		CHN-II;	CHN-II;
SX3	REF01032	Duan et al., 2018	China, Shaanxi, Baoji: Fengxian, Qinling Mountain	119.009				2.45209e-05				NA	34.2153	106.9		Plant	Fagales	Juglandaceae	Carya		bark		CHN-II;	CHN-II;
SX4	REF01033	Duan et al., 2018	China, Shaanxi, Baoji: Fengxian, Qinling Mountain	132.007				2.79174e-05				NA	34.2153	106.9		Plant	Fagales	Fagaceae			bark		CHN-II;	CHN-II;
SX5	REF01034	Duan et al., 2018	China, Shaanxi, Baoji: Fengxian, Qinling Mountain	76.148				2.96571e-05				,SX1,SX2	34.2153	106.9		Plant	Fagales	Fagaceae	Quercus		bark		CHN-II;	CHN-II;
SX7	REF01036	Duan et al., 2018	China, Shaanxi, Baoji: Fengxian, Qinling Mountain	108.178				3.91009e-05				NA	34.2153	106.9		Plant	Fagales	Fagaceae			bark		CHN-II;	CHN-II;
XJ3	REF01096	Duan et al., 2018	China, Xinjiang, Bayingolin prefecture	143.459				3.82725e-05				NA	41.7641	86.1453		Plant	Rosales	Rosaceae	Malus		fruit		NA	NA
XXY26L.1	REF01014	Duan et al., 2018	China, Hubei, Shennongjia: Xiangxiyuan	173.465				3.66157e-05				NA	31.4709	110.394		Plant					bark		TW1;CHN-IX	CHN-IX;
XXY30L.2	REF01015	Duan et al., 2018	China, Hubei, Shennongjia: Xiangxiyuan	129.348				3.00713e-05				NA	31.4709	110.394		Plant					bark		TW1;CHN-IX	CHN-IX;
XXYS1.4	REF01016	Duan et al., 2018	China, Hubei, Shennongjia: Xiangxiyuan	221.963				3.31364e-05				NA	31.4709	110.394		Plant					bark		TW1;CHN-IX	CHN-IX;
XXYS14.1	REF01017	Duan et al., 2018	China, Hubei, Shennongjia: Xiangxiyuan	182.424				3.42133e-05				NA	31.4709	110.394		Plant					bark		TW1;CHN-IX	CHN-IX;
XZ10.1	REF01209	Duan et al., 2018	China, Tibet, Shannan: Gongga	297.869				0.000468134				XZ3.1,XZ7,	29.2895	90.9841		Fermentation					daqu of Qingkejiu		NA	NA
XZ2.1	REF01204	Duan et al., 2018	China, Tibet, Lasa	149.329				0.00053391				XZ3.1,XZ7,	29.6548	91.1406		Fermentation					daqu of Qingkejiu		NA	NA
XZ3.1	REF01205	Duan et al., 2018	China, Tibet, Lasa: Dazi	89.3142				0.000656514				XZ7,XZ10.1,XZ2.1	29.6694	91.3499		Fermentation					daqu of Qingkejiu		NA	NA
XZ4.1	REF01206	Duan et al., 2018	China, Tibet, Nyingchi: Gongbujiangda	344.205				0.000645331				NA	29.8853	93.2461		Fermentation					daqu of Qingkejiu		NA	NA
XZ4.2	REF01207	Duan et al., 2018	China, Tibet, Nyingchi: Gongbujiangda	164.13				0.000436075				NA	29.8853	93.2461		Fermentation					daqu of Qingkejiu		NA	NA
XZ7	REF01208	Duan et al., 2018	China, Tibet, Shigatse: Nielamu	121.525				0.000629177				,XZ10.1,XZ2.1,XZ3.1	28.1552	85.9822		Fermentation					daqu of Qingkejiu		NA	NA
YN1	REF01099	Duan et al., 2018	China, Yunnan, Xishuangbanna Dai Autonomous Prefecture: Jinghong	83.3298				3.79412e-05				NA	22.0001	100.772		Plant	Poales	Bromeliaceae	Ananas		fruit		CHN-VI/VII.2;	TW3a;CHN-VI/VII.2a
YN3	REF01100	Duan et al., 2018	China, Yunnan, Dali Bai Autonomous Prefecture: Dali	79.5095				2.1373e-05				NA	25.5973	100.231		Environment					soil		NA	NA
YN5	REF01102	Duan et al., 2018	China, Yunnan, Dali Bai Autonomous Prefecture: Dali	126.443				2.49351e-05				NA	25.5973	100.231		Environment					soil		CHN-VI/VII.2;	TW3a;CHN-VI/VII.2a
ZJ1	REF01080	Duan et al., 2018	China, Zhejiang	71.8619				3.60358e-05				NA	29.2552	118.155		Plant					rotten wood		TW2;CHN-V	CHN-V;
ZJ2	REF01081	Duan et al., 2018	China, Zhejiang	50.8286				3.2308e-05				NA	29.2552	118.155		Plant					rotten wood		TW2;CHN-V	CHN-V;
ERR1308587	REF00885	Peter et al., 2018	Taiwan, Nantou, Sinyi: Dongpu	214.83		no		3.58701e-05				NA	23.5613	120.924		Fungus	Geastrales	Geastraceae	Geastrum	1	fruiting body		African_palm_wine;TW4	TW4;
ERR1308588	REF00357	Peter et al., 2018	Argentina, Mendoza, Mendoza	130.304				0.000888469				NA	-32.8895	-68.8458		Wine							NA	NA
ERR1308615	REF00550	Peter et al., 2018	Taiwan, Nantou, Yuchih	184.239		no		0.00234771				ERR1308864,ERR1309063,ERR1309092,ERR1309347,ERR1309385,	23.8754	120.919		Plant	Fabales	Fabaceae	Acacia	1	leaf		TW6;	TW6;
ERR1308661	REF00288	Peter et al., 2018	Spain, Castile-La Mancha	222.424				0.000170984				NA	39.2796	-3.0977		Wine					grape must		Wine/European;Olive_brine	Wine/European
ERR1308663	REF01059	Peter et al., 2018	China, Hainan, Qiongzhong: Wuzhi Mountain	203.845				3.08168e-05				HN11,HN19,HN8,HN9,	18.8983	109.704		Plant					rotten wood		CHN-III;CHN-VI/VII.1	CHN-III;
ERR1308675	REF00852	Peter et al., 2018	Malaysia	222.37				1.90534e-05				ERR1309324,ERR1309380,ERR1309525,	4.21048	101.976		Plant	Arecales	Arecaceae	Eugeissona		nectar		CHN-X;Malaysian	Malaysian;
ERR1308682	REF00838	Peter et al., 2018	Taiwan, Nantou, Sinyi	227.228		no		2.72547e-05				ERR1309189,	23.668	120.988		Environment				1	soil		TW1;CHN-IX	TW1;
ERR1308704	REF00887	Peter et al., 2018	Taiwan, Nantou, Sinyi: Dongpu	235.127		no		3.58701e-05				ERR1309335,	23.6978	120.961		Fungus	Russulales	Russulaceae	Russula	1	fruiting body		African_palm_wine;TW4	TW4;
ERR1308705	REF00065	Peter et al., 2018	Slovakia, Bratislava, Malacky: Male Levare	252.808				1.458e-05				ERR1309003,	48.502	16.9704		Plant	Rosales	Rosaceae	Pyrus		flower		Wine/European;Olive_brine	Wine/European
ERR1308709	REF00196	Peter et al., 2018	Italy	205.183				1.11007e-05				ERR1309252,	41.8719	12.5674		Clinical					vagina		Wine/European;Olive_brine	Wine/European
ERR1308713	REF00697	Peter et al., 2018	West Africa	253.847				0.000635887				ERR1308982,	13.5317	-2.46041		Fermentation					cocoa bean fermentation		NA	NA
ERR1308724	REF00702	Peter et al., 2018	Ghana	187.856				0.00110684				ERR1309181,	7.94653	-1.02319		Fermentation					cocoa bean fermentation		NA	NA
ERR1308728	REF00439	Peter et al., 2018	France, Nouvelle-Aquitaine, Gironde: Bordeaux	142.991				2.66748e-05				ERR1309022,ERR1309234,	44.8378	-0.57918		Plant					dead tree		Mediterranean_oak;	Mediterranean_oak;
ERR1308739	REF00894	Peter et al., 2018	USA, Pennsylvania	184.136				3.2805e-05				ERR1308867,ERR1308915,ERR1309359,ERR1309448,ERR1309458,	41.2033	-77.1945		Plant	Fagales	Fagaceae	Quercus		bark		CHN-VI/VII.2;	North_American_oak;
ERR1308745	REF00978	Peter et al., 2018	China	467.509				1.49114e-05				NA	35.8617	104.195		Distillery					daqu of Qingkejiu		NA	NA
ERR1308746	REF00840	Peter et al., 2018	Taiwan	191.5		no		3.24736e-05				NA	23.6978	120.961		Environment				1	soil		TW1;CHN-IX	TW1;
ERR1308750	REF01008	Peter et al., 2018	Thailand	280.712				2.21185e-05				NA	15.87	100.993		Fermentation					fermented shrimp		NA	NA
ERR1308751	REF00477	Peter et al., 2018	Ghana	206.266				0.00174347				ERR1308960,ERR1309191,	7.94653	-1.02319		Beer					daqu of Qingkejiu		NA	NA
ERR1308755	REF00119	Peter et al., 2018	Georgia	207.092				0.000361601				NA	42.3154	43.3569		Wine							NA	NA
ERR1308760	REF01002	Peter et al., 2018	Laos	212.484				0.000520987				ERR1308872,ERR1308906,	19.8563	102.495		Fermentation					rice wine		NA	NA
ERR1308764	REF00062	Peter et al., 2018	Slovenia	199.305				0.000408074				,ERR1308966	46.1512	14.9955		Plant	Rosales	Rosaceae	Prunus		fruit		Wine/European;Olive_brine	Wine/European
ERR1308766	REF00858	Peter et al., 2018	Taiwan, Taitung, Beinan	216.96		no		3.16452e-05				NA	22.7447	121.011		Plant	Rosales	Cannabaceae	Trema	1	leaf		NA	NA
ERR1308780	REF00492	Peter et al., 2018	Ghana	207.571				2.20357e-05				NA	7.94653	-1.02319		Bakery							NA	NA
ERR1308805	REF00945	Peter et al., 2018	Japan	197.006				2.14558e-05				NA	36.2048	138.253		Sake					Moto		NA	NA
ERR1308821	REF00070	Peter et al., 2018	Slovenia, Ljubljana	220.166				0.000219611				ERR1308966,	46.0569	14.5058		Others					homemade apple vingar		Wine/European;Olive_brine	Wine/European
ERR1308830	REF00841	Peter et al., 2018	Japan	209.131				2.59292e-05				NA	36.2048	138.253		Plant					exudate		CHN-IVb	CHN-IVb
ERR1308833	REF00806	Peter et al., 2018	Djibouti, Dikhil, Yoboki	285.634				0.00081648				NA	11.5092	42.1041		Palm wine					palm wine		NA	NA
ERR1308846	REF00145	Peter et al., 2018	Australia	249.852				1.30889e-05				NA	-25.2744	133.775		Wine					grape		Wine/European;Olive_brine	Wine/European
ERR1308852	REF00352	Peter et al., 2018	Georgia	181.593				9.60955e-06				ERR1308876,ERR1308926,ERR1309024,ERR1309091,	42.3154	43.3569		Wine							NA	NA
ERR1308863	REF00058	Peter et al., 2018	Slovakia, Nitra, Nitra: Male Zaluzie	256.058				1.50771e-05				NA	48.436	17.9863		Plant	Rosales	Rosaceae	Prunus		leaf		Wine/European;Olive_brine	Wine/European
ERR1308864	REF00553	Peter et al., 2018	Taiwan, Nantou, Yuchih	193.219		no		0.00253377				ERR1309063,ERR1309092,ERR1309347,ERR1309385,ERR1308615	23.8754	120.919		Plant	Fabales	Fabaceae	Acacia	1	leaf		TW6;	TW6;
ERR1308867	REF00896	Peter et al., 2018	USA, Pennsylvania	192.927				3.25565e-05				ERR1308915,ERR1309359,ERR1309448,ERR1309458,ERR1308739	41.2033	-77.1945		Plant	Fagales	Fagaceae	Quercus		soil		CHN-VI/VII.2;	North_American_oak;
ERR1308868	REF01006	Peter et al., 2018	China	245.35				0.000512785				NA	35.8617	104.195		Fermentation					fermenting rice		NA	NA
ERR1308872	REF01004	Peter et al., 2018	Laos	230.623				0.000486691				ERR1308906,ERR1308760	19.8563	102.495		Fermentation					rice wine		NA	NA
ERR1308873	REF00927	Peter et al., 2018	Japan	242.705				2.14558e-05				NA	36.2048	138.253		Sake					Sake		NA	NA
ERR1308876	REF00350	Peter et al., 2018	Georgia	164.227				1.01066e-05				ERR1308926,ERR1309024,ERR1309091,ERR1308852	42.3154	43.3569		Wine							NA	NA
ERR1308906	REF01003	Peter et al., 2018	Laos	226.363				0.000480975				,ERR1308760,ERR1308872	19.8563	102.495		Fermentation					rice wine		NA	NA
ERR1308911	REF00985	Peter et al., 2018	Taiwan	239.598		no		1.74794e-05				RG01,				Fermentation				1	fermenting rice (lao chao)		NA	NA
ERR1308915	REF00892	Peter et al., 2018	USA	198.603				3.37991e-05				ERR1309359,ERR1309448,ERR1309458,ERR1308739,ERR1308867	37.0902	-95.7129		Plant	Fagales	Fagaceae	Quercus		exudate		CHN-VI/VII.2;	North_American_oak;
ERR1308926	REF00347	Peter et al., 2018	Georgia	93.7867				9.02966e-06				ERR1309024,ERR1309091,ERR1308852,ERR1308876	42.3154	43.3569		Wine							NA	NA
ERR1308931	REF00061	Peter et al., 2018	Slovakia, Nitra, Nitra: Male Zaluzie	271.58				1.26747e-05				ERR1309227,	48.436	17.9863		Plant	Rosales	Rosaceae	Prunus		flower		Wine/European;Olive_brine	Wine/European
ERR1308937	REF00936	Peter et al., 2018	Japan	665.57				3.14796e-05				NA	36.2048	138.253		Sake					Sake		NA	NA
ERR1308953	REF01047	Peter et al., 2018	China, Beijing, Lingshui: Dongling Mountain	259.785				3.13139e-05				,BJ23	39.9042	116.407		Plant	Fagales	Fagaceae	Quercus		bark		CHN-IVa	CHN-IVa
ERR1308960	REF00478	Peter et al., 2018	Ghana	210.418				0.00169534				ERR1309191,ERR1308751	7.94653	-1.02319		Beer					sorghum beer		NA	NA
ERR1308963	REF00817	Peter et al., 2018	Burkina Faso	236.041				0.000137764				NA	12.2383	-1.56159		Palm wine					palm wine		NA	NA
ERR1308966	REF00057	Peter et al., 2018	Slovakia, Nitra, Nitra: Male Zaluzie	236.813				0.000428785				ERR1308764,ERR1308821	48.436	17.9863		Plant	Rosales	Rosaceae	Prunus		fruit		Wine/European;Olive_brine	Wine/European
ERR1308982	REF00696	Peter et al., 2018	West Africa	242.333				0.000636218				,ERR1308713	13.5317	-2.46041		Fermentation					cocoa bean fermentation		NA	NA
ERR1308996	REF01028	Peter et al., 2018	China, Hainan, Changjiang: Bawangling Mountain	229.992				2.12901e-05				HN4,HN5,	19.1212	109.083		Plant					rotten wood		CHN-I;	CHN-I;
ERR1309003	REF00064	Peter et al., 2018	Slovakia, Bratislava, Malacky: Male Levare	237.334				1.47457e-05				,ERR1308705	48.502	16.9704		Plant	Rosales	Rosaceae	Malus		flower		Wine/European;Olive_brine	Wine/European
ERR1309012	REF00069	Peter et al., 2018	Ukraine, Kiev	215.874				1.52427e-05				NA	50.4501	30.5234		Plant	Pinales	Pinaceae	Abies		leaf		Wine/European;Olive_brine	Wine/European
ERR1309019	REF00973	Peter et al., 2018	Taiwan	247.201		no		2.916e-05				NA				industrial				1	molasses		NA	NA
ERR1309022	REF00441	Peter et al., 2018	France, Nouvelle-Aquitaine, Gironde: Bordeaux	177.842				2.72547e-05				ERR1309234,ERR1308728	44.8378	-0.57918		Plant					flower		Mediterranean_oak;	Mediterranean_oak;
ERR1309024	REF00349	Peter et al., 2018	Georgia	193.261				1.06865e-05				ERR1309091,ERR1308852,ERR1308876,ERR1308926	42.3154	43.3569		Wine							NA	NA
ERR1309029	REF00935	Peter et al., 2018	Japan	205.554				1.97161e-05				NA	36.2048	138.253		Sake					Sake		NA	NA
ERR1309036	REF00830	Peter et al., 2018	West Africa	326.011				2.41067e-05				ERR1309447,	13.5317	-2.46041		Palm wine					Bili wine		NA	NA
ERR1309044	REF00188	Peter et al., 2018	Georgia	320.343				1.11835e-05				,ERR1309286	42.3154	43.3569		Wine							NA	NA
ERR1309052	REF00436	Peter et al., 2018	Hungary	331.421				2.03789e-05				ERR1309256,	47.1625	19.5033		Environment					soil		Mediterranean_oak;	Mediterranean_oak;
ERR1309063	REF00551	Peter et al., 2018	Taiwan, Nantou, Yuchih	226.703		no		0.00253692				ERR1309092,ERR1309347,ERR1309385,ERR1308615,ERR1308864	23.8754	120.919		Plant	Pinales	Podocarpaceae	Podocarpus	1	leaf		TW6;	TW6;
ERR1309087	REF00980	Peter et al., 2018	Vietnam, Saigon	213.626				0.000499531				NA	10.8231	106.63		Fermentation					rice fermentation starter culture		NA	NA
ERR1309091	REF00348	Peter et al., 2018	Georgia	186.359				9.52671e-06				,ERR1308852,ERR1308876,ERR1308926,ERR1309024	42.3154	43.3569		Wine							NA	NA
ERR1309092	REF00549	Peter et al., 2018	Taiwan, Nantou, Yuchih	210.201		no		0.00240852				ERR1309347,ERR1309385,ERR1308615,ERR1308864,ERR1309063	23.8754	120.919		Plant	Pinales	Cupressaceae	Cunninghamia	1	leaf		TW6;	TW6;
ERR1309143	REF00168	Peter et al., 2018	Taiwan, Hualien, Jhuosi	221.343		no		2.36925e-05				NA	23.404	121.217		Environment				1	soil		Wine/European;Olive_brine	Wine/European
ERR1309150	REF00843	Peter et al., 2018	Japan	208.562				3.18109e-05				NA	36.2048	138.253		Plant					exudate		CHN-IVb	CHN-IVb
ERR1309159	REF00942	Peter et al., 2018	Japan	215.206				2.1373e-05				NA	36.2048	138.253		Sake					Sake		NA	NA
ERR1309165	REF00491	Peter et al., 2018	Ghana	139.867				2.16215e-05				NA	7.94653	-1.02319		Bakery							NA	NA
ERR1309167	REF01007	Peter et al., 2018	Thailand	218.195				1.88877e-05				NA	15.87	100.993		Fermentation					fermented fish		NA	NA
ERR1309170	REF00239	Peter et al., 2018	China, Beijing	210.542				0.000160629				NA	39.9042	116.407		Plant	Sapindales	Sapindaceae	Litchi		flower		Wine/European;Olive_brine	Wine/European
ERR1309181	REF00704	Peter et al., 2018	West Africa	196.257				0.00098763				,ERR1308724	13.5317	-2.46041		Fermentation					cocoa bean fermentation		NA	NA
ERR1309189	REF00839	Peter et al., 2018	Taiwan	215.672		no		2.7586e-05				,ERR1308682	23.6978	120.961		Environment				1	soil		NA	NA
ERR1309191	REF00479	Peter et al., 2018	Ivory Coast, Moyen-Comoé, Abengourou: Abengourou	280.966				0.0011886				,ERR1308751,ERR1308960	6.7157	-3.48013		Beer					pearl millet beer		NA	NA
ERR1309198	REF00842	Peter et al., 2018	Japan	202.436				2.27813e-05				NA	36.2048	138.253		Plant					exudate		CHN-IVb	CHN-IVb
ERR1309221	REF00059	Peter et al., 2018	Slovakia, Bratislava, Malacky: Male Levare	276.249				1.75623e-05				NA	48.502	16.9704		Plant	Rosales	Rosaceae	Prunus		flower		Wine/European;Olive_brine	Wine/European
ERR1309227	REF00060	Peter et al., 2018	Slovakia, Nitra, Nitra: Male Zaluzie	241.729				1.3006e-05				,ERR1308931	48.436	17.9863		Plant	Rosales	Rosaceae	Prunus		flower		Wine/European;Olive_brine	Wine/European
ERR1309231	REF00823	Peter et al., 2018	Nigeria	252.716				0.000123764				NA	9.082	8.67528		Palm wine					palm wine		NA	NA
ERR1309234	REF00440	Peter et al., 2018	France, Nouvelle-Aquitaine, Gironde: Bordeaux	208.311				2.69233e-05				,ERR1308728,ERR1309022	44.8378	-0.57918		Plant					leaf		Mediterranean_oak;	Mediterranean_oak;
ERR1309245	REF00295	Peter et al., 2018	Australia, South Australia, McLaren Valley	160.422				1.43315e-05				NA	-35.221	138.546		Wine					grape		Wine/European;Olive_brine	Wine/European
ERR1309246	REF00281	Peter et al., 2018	Spain, Castile-La Mancha	238.674				1.01066e-05				NA	39.538	-2.69839		Wine					grape must		Wine/European;Olive_brine	Wine/European
ERR1309248	REF00434	Peter et al., 2018	Russia, Krasnodar, Gelendzhik	251.329				2.19528e-05				NA	44.562	38.0905		Plant	Fagales	Fagaceae	Quercus		exudate		Mediterranean_oak;	Mediterranean_oak;
ERR1309252	REF00200	Peter et al., 2018	Italy	183.794				9.85807e-06				,ERR1308709	41.8719	12.5674		Clinical					vagina		Wine/European;Olive_brine	Wine/European
ERR1309256	REF00435	Peter et al., 2018	Hungary	238.39				2.36925e-05				,ERR1309052	47.1625	19.5033		Environment					soil		Mediterranean_oak;	Mediterranean_oak;
ERR1309286	REF00189	Peter et al., 2018	Georgia	188.066				1.12664e-05				ERR1309044,	42.3154	43.3569		Wine							NA	NA
ERR1309324	REF00850	Peter et al., 2018	Malaysia	185.679				1.91363e-05				ERR1309380,ERR1309525,ERR1308675	4.21048	101.976		Plant	Arecales	Arecaceae	Eugeissona		nectar		CHN-X;Malaysian	Malaysian;
ERR1309335	REF00886	Peter et al., 2018	Taiwan	191.262		no		3.39648e-05				,ERR1308704	23.5613	120.924		Fungus	Russulales	Russulaceae	Russula	1	fruiting body		African_palm_wine;TW4	TW4;
ERR1309347	REF00552	Peter et al., 2018	Taiwan, Nantou, Yuchih	184.777		no		0.00257188				ERR1309385,ERR1308615,ERR1308864,ERR1309063,ERR1309092	23.8754	120.919		Plant	Ericales	Primulaceae	Ardisia	1	leaf		TW6;	TW6;
ERR1309349	REF01075	Peter et al., 2018	China, Hainan, Qiongzhong: Wuzhi Mountain	217.625				3.65329e-05				NA	18.8983	109.704		Plant					rotten wood		TW2;CHN-V	CHN-V;
ERR1309352	REF00438	Peter et al., 2018	Portugal, Portalegre, Castelo de Vide	204.133				2.41896e-05				NA	39.4142	-7.45396		Plant	Fagales	Fagaceae	Quercus				Mediterranean_oak;	Mediterranean_oak;
ERR1309358	REF00493	Peter et al., 2018	Ghana	218.851				2.21185e-05				NA	7.94653	-1.02319		Bakery							NA	NA
ERR1309359	REF00898	Peter et al., 2018	USA, Pennsylvania	234.513				3.37991e-05				ERR1309448,ERR1309458,ERR1308739,ERR1308867,ERR1308915	41.2033	-77.1945		Plant	Fagales	Fagaceae	Quercus		soil		CHN-VI/VII.2;	North_American_oak;
ERR1309380	REF00851	Peter et al., 2018	Malaysia	179.274				1.80593e-05				ERR1309525,ERR1308675,ERR1309324	4.21048	101.976		Plant	Arecales	Arecaceae	Eugeissona		nectar		CHN-X;Malaysian	Malaysian;
ERR1309385	REF00577	Peter et al., 2018	Taiwan, Nantou, Yuchih	263.394		no		0.00293746				,ERR1308615,ERR1308864,ERR1309063,ERR1309092,ERR1309347	23.8754	120.919		Plant	Gentianales	Rubiaceae	Wendlandia	1	leaf		TW6;	TW6;
ERR1309389	REF00063	Peter et al., 2018	Slovenia	249.831				3.53731e-05				NA	46.1512	14.9955		Plant	Rosales	Amygdaloideae	Pyrus		fruit		NA	NA
ERR1309394	REF00034	Peter et al., 2018	Spain, Castile-La Mancha, Ciudad Real: Santa Cruz de los Canamos	212.998				1.68996e-05				NA	38.637	-2.86582		Wine					grape must		Wine/European;Olive_brine	Wine/European
ERR1309395	REF00198	Peter et al., 2018	Italy	321.441				9.69239e-06				NA	41.8719	12.5674		Clinical					vagina		Wine/European;Olive_brine	Wine/European
ERR1309428	REF00213	Peter et al., 2018	Australia, South Australia, Adelaide	278.399				0.000206688				NA	-34.9285	138.601		Wine					grape		Wine/European;Olive_brine	Wine/European
ERR1309447	REF00828	Peter et al., 2018	Ivory Coast	249.349				2.41896e-05				,ERR1309036	7.53999	-5.54708		Palm wine					palm wine		NA	NA
ERR1309448	REF00900	Peter et al., 2018	USA, Pennsylvania	277.774				3.37163e-05				ERR1309458,ERR1308739,ERR1308867,ERR1308915,ERR1309359	41.2033	-77.1945		Plant	Fagales	Fagaceae	Quercus		soil		CHN-VI/VII.2;	North_American_oak;
ERR1309458	REF00895	Peter et al., 2018	USA, Pennsylvania	223.784				3.22251e-05				,ERR1308739,ERR1308867,ERR1308915,ERR1309359,ERR1309448	41.2033	-77.1945		Plant	Fagales	Fagaceae	Quercus		flux		CHN-VI/VII.2;	North_American_oak;
ERR1309484	REF00819	Peter et al., 2018	Nigeria	189.136				2.48523e-05				NA	9.082	8.67528		Palm wine					palm wine		NA	NA
ERR1309488	REF00437	Peter et al., 2018	Montenegro, Niksic, Jasenovo polje	215.92				2.56807e-05				NA	42.8957	18.9636		Plant	Fagales	Fagaceae	Quercus				Mediterranean_oak;	Mediterranean_oak;
ERR1309492	REF00983	Peter et al., 2018	Vietnam, Binh Thuan, Phan Thiet	243.457				0.000339316				NA	10.9582	108.05		Fermentation					rice fermentation starter culture		NA	NA
ERR1309509	REF00934	Peter et al., 2018	Japan	245.382				1.91363e-05				NA	36.2048	138.253		Sake					Sake		NA	NA
ERR1309525	REF00853	Peter et al., 2018	Malaysia	291.078				1.97161e-05				,ERR1308675,ERR1309324,ERR1309380	4.21048	101.976		Plant	Arecales	Arecaceae	Eugeissona		nectar		CHN-X;Malaysian	Malaysian;
ERR3010121	REF01513	Pontes et al., 2019	Portugal, Santarem, Macao	63.5785				3.47932e-05				NA	39.6043	-7.98108		Plant	Lamiales	Oleaceae	Olea		fruit		NA	NA
ERR3010122	REF01466	Pontes et al., 2019	Portugal, Lisbon, Oeiras	30.7128				0.00055694				NA	38.692	-9.31184		Fermentation					table olive brine		NA	NA
ERR3010124	REF01512	Pontes et al., 2019	Portugal, Evora, Portel: Alqueva	30.4044				3.42961e-05				NA	38.2168	-7.53884		Plant	Lamiales	Oleaceae	Olea		fruit		NA	NA
ERR3010125	REF01467	Pontes et al., 2019	Portugal, Lisbon, Lisbon	45.9223				3.67814e-05				NA	38.7223	-9.13934		Fermentation					table olive brine		NA	NA
ERR3010126	REF01468	Pontes et al., 2019	Portugal, Lisbon, Lisbon	11.6716				3.16452e-05				NA	38.7223	-9.13934		Fermentation					table olive brine		NA	NA
ERR3010127	REF01469	Pontes et al., 2019	Portugal, Lisbon, Lisbon	36.4165				3.67814e-05				NA	38.7223	-9.13934		Fermentation					table olive brine		NA	NA
ERR3010128	REF01470	Pontes et al., 2019	Portugal: Douro	27.1895				3.1231e-05				NA	41.5013	-5.51229		Fermentation					table olive brine		NA	NA
ERR3010129	REF01471	Pontes et al., 2019	Portugal: Douro	30.8298				3.60358e-05				NA	41.5013	-5.51229		Fermentation					table olive brine		NA	NA
RG01	SP00370	This study	Taiwan	85.3657	2	no	30	1.76451e-05	Yes	Asian_fermentation-(A)	1	,ERR1308911				Industrial				1	commercial lao chao	NA	NA	NA	SRR15616304
RG02	SP00371	This study	Taiwan	80.9745	2	no	30	5.70774e-05	Yes	Asian_fermentation-(B)	1	NA				Industrial				1	commercial lao chao	NA	NA	NA	SRR15616303
RG03	SP00372	This study	Taiwan	70.2006	2	no	30	0.00189581	Yes	Asian_fermentation-(C)	2	RG04,				Industrial				1	pineapple juice	NA	NA	NA	SRR15616302
RG04	SP00373	This study	Taiwan	83.538	2	no	30	0.00189507	No	Asian_fermentation-(C)	2	,RG03				Industrial				1	pineapple juice	NA	NA	NA	SRR15616301
RG05	SP00374	This study	Taiwan, Chiayi	76.7395	2	no	10,15,20,25,30,35,40	0.00122348	Yes	Asian_fermentation-(D)	1	NA				Industrial				1	fermenting molasses	NA	NA	NA	SRR15616300
RG09	SP00375	This study	Taiwan, Pingtung	69.3887	2	no	10,15,20,25,30,35,40	0.000301541	Yes	Asian_fermentation-(E)	2	RG12,				Fermentation				1	millet wine prep(raw dough)	S	NA	NA	SRR15616297
RG12	SP00377	This study	Taiwan, Pingtung	70.9618	2	no	30	0.000300961	No	Asian_fermentation-(E)	2	,RG09				Fermentation				1	millet wine sediment	NA	NA	NA	SRR15616293
RG10	SP00376	This study	Taiwan, Pingtung	77.8803	2	no	10,15,20,25,30,35,40	6.26278e-05	Yes	Asian_fermentation-(F)	1	NA				Fermentation				1	millet wine prep(dough wrapped)	W	NA	NA	SRR15616296
SR24	SP00378	This study	Taiwan, Taipei	56.5323	2	no	10,15,20,25,30,35,40	0.000409897	Yes	Asian_fermentation-(G)	2	SR25,				Fermentation				1	shiokoji Triticum aestivum	H	NA	NA	SRR15616246
SR25	SP00379	This study	Taiwan, Taipei	67.2091	2	no	30	0.000447341	No	Asian_fermentation-(G)	2	,SR24				Fermentation				1	shiokoji Oriza sativa	H	NA	NA	SRR15616245
S10	SPA0084	This study	Taiwan, Yilan, Yuanshan: Fushan Botanical Garden	115.065	2	yes	10,15,20,25,30,35,40	2.62606e-05	Yes	CHN-VI/VII.1-(A)	4	S11,S12,XI02_S1,	24.7626	121.585	625.305	Plant	Fagales	Fagaceae	Quercus	1	leaf	S	CHN-III;CHN-VI/VII.1	CHN-VI/VII.1;	SRR15616292
S11	SPA0085	This study	Taiwan, Yilan, Yuanshan: Fushan Botanical Garden	54.4338	2	no	30	2.77517e-05	No	CHN-VI/VII.1-(A)	4	S12,XI02_S1,S10	24.7624	121.585	635.776	Plant	Fagales	Fagaceae	Quercus	1	soil	H	CHN-III;CHN-VI/VII.1	CHN-VI/VII.1;	SRR15616291
S12	SPA0102	This study	Taiwan, Yilan, Yuanshan: Fushan Botanical Garden	95.7326	2	no	10,15,20,25,30,35,40	2.65919e-05	No	CHN-VI/VII.1-(A)	4	XI02_S1,S10,S11	24.7617	121.584	643.74	Plant	Fagales	Fagaceae	Castanopsis	1	litter	H	CHN-III;CHN-VI/VII.1	CHN-VI/VII.1;	SRR15616290
XI02	SPA0189	This study	Taiwan, New Taipei, Shiding: Zhongyangkeng Road	101.233	2	no	10,15,20,25,30,35,40	2.65919e-05	No	CHN-VI/VII.1-(A)	4	,S10,S11,S12	25.0029	121.687	261.763	Plant	Sapindales	Sapindaceae	Koelreuteria	1	bark	H	CHN-III;CHN-VI/VII.1	CHN-VI/VII.1;	SRR15616241
S7	SPA0050	This study	Taiwan, Taipei, Nangang: Nangangshan Hiking Trail	90.1092	2	yes	10,15,20,25,30,35,40	3.41305e-05	Yes	CHN-VI/VII.1-(B)	1	NA	25.033	121.609	55.467	Plant	Malpighiales	Euphorbiaceae	Mallotus	1	soil	S	CHN-III;CHN-VI/VII.1	CHN-VI/VII.1;	SRR15616276
PD30A	SP00119	This study	Taiwan, Taitung, Beinan: Lijia Forest Road	126.004	2	no	10,15,20,25,30,35,40	3.17281e-05	Yes	CHN-VI/VII.2	2	PD32A,	22.8078	121.03	1023.6	Plant	Fagales	Fagaceae	Castanopsis	2	leaf	H	CHN-VI/VII.2;	TW3a;CHN-VI/VII.2a	SRR15616318
PD32A	SP00119	This study	Taiwan, Taitung, Beinan: Lijia Forest Road	104.628	2	no	10,15,20,25,30,35,40	3.16452e-05	No	CHN-VI/VII.2	2	,PD30A	22.8078	121.03	1023.6	Plant	Fagales	Fagaceae	Castanopsis	2	leaf	S	CHN-VI/VII.2;	TW3a;CHN-VI/VII.2a	SRR15616315
S14	SPA0108	This study	Taiwan, Yilan, Yuanshan: Fushan Botanical Garden	121.775	2	yes	10,15,20,25,30,35,40	1.59055e-05	Yes	CHN-VIII-(A)	3	S15,SR23,	24.7627	121.586	647.7	Plant	Fagales	Fagaceae	Quercus	1	litter	H	CHN-VIII;	CHN-VIII;	SRR15616288
S15	SPA0109	This study	Taiwan, Yilan, Yuanshan: Fushan Botanical Garden	89.5762	2	no	10,15,20,25,30,35,40	1.64025e-05	No	CHN-VIII-(A)	3	SR23,S14	24.7628	121.586	652.064	Plant	Fagales	Fagaceae	Quercus	1	leaf	H	CHN-VIII;	CHN-VIII;	SRR15616287
SR23	SP00026	This study	Taiwan, Yilan, Datong: Taipingshan Forest Recreation Area, Taiwan Beech Trail	51.5619	2	no	30	1.91363e-05	No	CHN-VIII-(A)	3	,S14,S15	24.5065	121.63	1789.6	Plant	Fagales	Fagaceae	Fagus	1	litter	H	CHN-VIII;	CHN-VIII;	SRR15616247
S16	SPA0138	This study	Taiwan, Taipei, Nangang: Academia Sinica	81.2251	2	yes	10,15,20,25,30,35,40	3.47104e-05	Yes	CHN-VIII-(B)	1	NA	25.0454	121.613	18.199	Plant	Zingiberales	Zingiberaceae	Hedychium	1	litter	S	CHN-VIII;	CHN-VIII;	SRR15616286
PD26A	SP00101	This study	Taiwan, Hualien, Fuli: Cilamitay	101.842	2	no	10,15,20,25,30,35,40	2.42724e-05	No	TW_Mosaic-(A)	2	PD27A,	23.1428	121.283	389	Plant	Rosales	Moraceae	Broussonetia	2	fruit	H	NA	NA	SRR15616322
PD27A	SP00101	This study	Taiwan, Hualien, Fuli: Cilamitay	103.498	2	yes	10,15,20,25,30,35,40	2.42724e-05	Yes	TW_Mosaic-(A)	2	,PD26A	23.1428	121.283	389	Plant	Rosales	Moraceae	Broussonetia	2	fruit	S	NA	NA	SRR15616321
PD28A	SP00104	This study	Taiwan, Taitung, Beinan: Castanopsis carlesii seed orchard	121.721	2	yes	10,15,20,25,30,35,40	3.09825e-05	Yes	TW_Mosaic-(B)	1	NA	22.7971	121.036	776.9	Plant	Fagales	Fagaceae	Castanopsis	2	bark	S	NA	NA	SRR15616320
PD29A	SP00104	This study	Taiwan, Taitung, Beinan: Castanopsis carlesii seed orchard	120.149	2	no	10,15,20,25,30,35,40	2.24499e-05	Yes	TW_Mosaic-(C)	1	NA	22.7971	121.036	776.9	Plant	Fagales	Fagaceae	Castanopsis	2	deadwood bark	S	NA	NA	SRR15616319
PD38A	SP00147	This study	Taiwan, Nantou, Puli: Shikeng Road	120.166	2	yes	10,15,20,25,30,35,40	3.54559e-05	Yes	TW_Mosaic-(D)	1	NA	23.9901	121.016	554.7	Plant	Fagales	Fagaceae	Castanopsis	4	fruit	H	NA	NA	SRR15616309
PD39A	SP00149	This study	Taiwan, Nantou, Puli: Moon River Villa	95.4752	2	no	10,15,20,25,30,35,40	0.000909594	Yes	TW_Mosaic-(E)	1	NA	23.9649	120.947	445	Plant	Fagales	Fagaceae	Lithocarpus	1	litter	H	NA	NA	SRR15616308
PD41A	SP00016	This study	Taiwan, Island, Dongsha: Da-Wang temple	112.582	2	yes	10,15,20,25,30,35,40	3.91009e-05	Yes	TW_Mosaic-(F)	1	NA	20.7013	116.728	0	Plant	Pinales	Pinaceae	Pinus	1	fruit abscission	H	NA	NA	SRR15616305
S8	SPA0080	This study	Taiwan, Yilan, Yuanshan: Fushan Botanical Garden	84.7097	2	yes	10,15,20,25,30,35,40	3.05683e-05	Yes	TW_Mosaic-(G)	1	NA	24.7629	121.586	651.232	Plant	Fagales	Fagaceae	Quercus	1	litter	H	NA	NA	SRR15616275
S9	SPA0082	This study	Taiwan, Yilan, Yuanshan: Fushan Botanical Garden	112.54	2	no	10,15,20,25,30,35,40	3.01541e-05	Yes	TW_Mosaic-(H)	1	NA	24.7627	121.585	619.758	Plant	Fagales	Fagaceae	Quercus	1	litter	S	NA	NA	SRR15616274
S13	SPA0107	This study	Taiwan, Yilan, Yuanshan: Fushan Botanical Garden	103.828	2	yes	10,15,20,25,30,35,40	0.00136381	Yes	TW_Mosaic-(I)	1	NA	24.7624	121.585	648.17	Plant	Fagales	Fagaceae	Quercus	1	litter	H	NA	NA	SRR15616289
SR13	SP00309	This study	Taiwan, Yilan, Yuanshan: Fushan Botanical Garden	67.18	2	no	10,15,20,25,30,35,40	2.55979e-05	Yes	TW_Mosaic-(J)	1	NA	24.762	121.585	653.77	Plant	Fagales	Fagaceae	Lithocarpus	1	leaf	H	NA	NA	SRR15616258
XI07	SPA0319	This study	Taiwan, Yilan, Datong: Tuling	103.02	2	no	10,15,20,25,30,35,40	0.000788563	Yes	TW_Mosaic-(K)	1	NA	24.4036	121.361	1569.07	Plant	Crossosomatales	Stachyuraceae	Stachyurus	1	twig	H	NA	NA	SRR15616237
H342-1	SPA0342	This study	Taiwan, Yilan, Datong: Tuling	108.301	2	no	30	2.84973e-05	No	TW1-(A)	24	SPA0344,H344_7,SPA0348,H348_7,SPA0354,SPA0356,SPA0359,H359_1,SPA0366,XI04_S3,H346_1,H347_8,H352_8,H409_8,H411_8,H412_8,H414_8,H415_8,H418_7,H420_8,PD24A,PD25A,SPA0342	24.4046	121.362	1548	Plant	Fagales	Fagaceae	Lithocarpus	2	leaf	H	TW1;CHN-IX	TW1;	SRR15616262
H344-7	SPA0344	This study	Taiwan, Yilan, Datong: Tuling	137.325	2	no	30	2.85801e-05	No	TW1-(A)	24	SPA0348,H348_7,SPA0354,SPA0356,SPA0359,H359_1,SPA0366,XI04_S3,H346_1,H347_8,H352_8,H409_8,H411_8,H412_8,H414_8,H415_8,H418_7,H420_8,PD24A,PD25A,SPA0342,H342_1,SPA0344	24.4046	121.362	1566.4	Plant	Fagales	Fagaceae	Lithocarpus	2	soil	H	NA	NA	SRR15616261
H346-1	SPA0346	This study	Taiwan, Yilan, Datong: Tuling	126.615	2	no	30	3.05683e-05	No	TW1-(A)	24	H347_8,H352_8,H409_8,H411_8,H412_8,H414_8,H415_8,H418_7,H420_8,PD24A,PD25A,SPA0342,H342_1,SPA0344,H344_7,SPA0348,H348_7,SPA0354,SPA0356,SPA0359,H359_1,SPA0366,XI04_S3	24.4044	121.362	1572.4	Plant	Rosales	Rosaceae	Eriobotrya	1	leaf	H	NA	NA	SRR15616350
H347-8	SPA0347	This study	Taiwan, Yilan, Datong: Tuling	116.771	2	no	30	3.04855e-05	No	TW1-(A)	24	H352_8,H409_8,H411_8,H412_8,H414_8,H415_8,H418_7,H420_8,PD24A,PD25A,SPA0342,H342_1,SPA0344,H344_7,SPA0348,H348_7,SPA0354,SPA0356,SPA0359,H359_1,SPA0366,XI04_S3,H346_1	24.4043	121.362	1577.1	Plant	Laurales	Lauraceae	Litsea	1	litter	H	NA	NA	SRR15616339
H348-7	SPA0348	This study	Taiwan, Yilan, Datong: Tuling	111.171	2	no	30	2.94085e-05	No	TW1-(A)	24	SPA0354,SPA0356,SPA0359,H359_1,SPA0366,XI04_S3,H346_1,H347_8,H352_8,H409_8,H411_8,H412_8,H414_8,H415_8,H418_7,H420_8,PD24A,PD25A,SPA0342,H342_1,SPA0344,H344_7,SPA0348	24.4042	121.362	1582.2	Plant	Fagales	Fagaceae	Quercus	2	soil	H	NA	NA	SRR15616328
H352-8	SPA0352	This study	Taiwan, Yilan, Datong: Tuling	108.463	2	no	30	2.99056e-05	No	TW1-(A)	24	H409_8,H411_8,H412_8,H414_8,H415_8,H418_7,H420_8,PD24A,PD25A,SPA0342,H342_1,SPA0344,H344_7,SPA0348,H348_7,SPA0354,SPA0356,SPA0359,H359_1,SPA0366,XI04_S3,H346_1,H347_8	24.4042	121.363	1588.8	Plant	Ericales	Symplocaceae	Symplocos	1	litter	H	NA	NA	SRR15616317
H359-1	SPA0359	This study	Taiwan, Yilan, Datong: Tuling	109.561	2	no	30	0.000127658	No	TW1-(A)	24	SPA0366,XI04_S3,H346_1,H347_8,H352_8,H409_8,H411_8,H412_8,H414_8,H415_8,H418_7,H420_8,PD24A,PD25A,SPA0342,H342_1,SPA0344,H344_7,SPA0348,H348_7,SPA0354,SPA0356,SPA0359	24.4041	121.363	1592	Plant	Laurales	Lauraceae	Litsea	2	leaf	H	TW1;CHN-IX	TW1;	SRR15616306
H409-8	SPA0409	This study	Taiwan, Yilan, Datong: Tuling	165.299	2	no	30	2.99056e-05	No	TW1-(A)	24	H411_8,H412_8,H414_8,H415_8,H418_7,H420_8,PD24A,PD25A,SPA0342,H342_1,SPA0344,H344_7,SPA0348,H348_7,SPA0354,SPA0356,SPA0359,H359_1,SPA0366,XI04_S3,H346_1,H347_8,H352_8	24.4042	121.363	1601.9	Plant	Fagales	Fagaceae	Lithocarpus	1	litter	H	NA	NA	SRR15616295
H411-8	SPA0411	This study	Taiwan, Yilan, Datong: Tuling	114.255	2	no	30	2.96571e-05	No	TW1-(A)	24	H412_8,H414_8,H415_8,H418_7,H420_8,PD24A,PD25A,SPA0342,H342_1,SPA0344,H344_7,SPA0348,H348_7,SPA0354,SPA0356,SPA0359,H359_1,SPA0366,XI04_S3,H346_1,H347_8,H352_8,H409_8	24.4041	121.363	1601.46	Plant	Laurales	Lauraceae	Litsea	1	litter	H	NA	NA	SRR15616284
H412-8	SPA0412	This study	Taiwan, Yilan, Datong: Tuling	160.98	2	no	10,15,20,25,30,35,40	2.79174e-05	No	TW1-(A)	24	H414_8,H415_8,H418_7,H420_8,PD24A,PD25A,SPA0342,H342_1,SPA0344,H344_7,SPA0348,H348_7,SPA0354,SPA0356,SPA0359,H359_1,SPA0366,XI04_S3,H346_1,H347_8,H352_8,H409_8,H411_8	24.404	121.363	1603.77	Plant	Cornales	Hydrangeaceae	Hydrangea	1	litter	H	NA	NA	SRR15616273
H414-8	SPA0414	This study	Taiwan, Yilan, Datong: Tuling	155.555	2	no	30	2.85801e-05	No	TW1-(A)	24	H415_8,H418_7,H420_8,PD24A,PD25A,SPA0342,H342_1,SPA0344,H344_7,SPA0348,H348_7,SPA0354,SPA0356,SPA0359,H359_1,SPA0366,XI04_S3,H346_1,H347_8,H352_8,H409_8,H411_8,H412_8	24.404	121.363	1604.86	Plant	Fagales	Fagaceae	Lithocarpus	1	litter	H	NA	NA	SRR15616249
H415-8	SPA0415	This study	Taiwan, Yilan, Datong: Tuling	168.495	2	no	30	2.84973e-05	No	TW1-(A)	24	H418_7,H420_8,PD24A,PD25A,SPA0342,H342_1,SPA0344,H344_7,SPA0348,H348_7,SPA0354,SPA0356,SPA0359,H359_1,SPA0366,XI04_S3,H346_1,H347_8,H352_8,H409_8,H411_8,H412_8,H414_8	24.404	121.363	1608.52	Plant	Laurales	Lauraceae	Litsea	1	litter	H	NA	NA	SRR15616238
H418-7	SPA0418	This study	Taiwan, Yilan, Datong: Tuling	161.926	2	no	30	2.82488e-05	No	TW1-(A)	24	H420_8,PD24A,PD25A,SPA0342,H342_1,SPA0344,H344_7,SPA0348,H348_7,SPA0354,SPA0356,SPA0359,H359_1,SPA0366,XI04_S3,H346_1,H347_8,H352_8,H409_8,H411_8,H412_8,H414_8,H415_8	24.404	121.363	1614.07	Plant	Laurales	Lauraceae	Machilus	1	soil	H	TW1;CHN-IX	TW1;	SRR15616235
H420-8	SPA0420	This study	Taiwan, Yilan, Datong: Tuling	121.995	2	no	30	2.90772e-05	No	TW1-(A)	24	,PD24A,PD25A,SPA0342,H342_1,SPA0344,H344_7,SPA0348,H348_7,SPA0354,SPA0356,SPA0359,H359_1,SPA0366,XI04_S3,H346_1,H347_8,H352_8,H409_8,H411_8,H412_8,H414_8,H415_8,H418_7	24.4039	121.363	1615.74	Plant	Laurales	Lauraceae	Machilus	1	litter	H	NA	NA	SRR15616234
PD24A	SP00046	This study	Taiwan, Yilan, Datong: Tuling	96.2948	2	yes	10,15,20,25,30,35,40	3.01541e-05	No	TW1-(A)	24	PD25A,SPA0342,H342_1,SPA0344,H344_7,SPA0348,H348_7,SPA0354,SPA0356,SPA0359,H359_1,SPA0366,XI04_S3,H346_1,H347_8,H352_8,H409_8,H411_8,H412_8,H414_8,H415_8,H418_7,H420_8,	24.4037	121.361	1559.2	Plant	Fagales	Fagaceae	Quercus	1	leaf	H	TW1;CHN-IX	TW1;	SRR15616324
PD25A	SP00089	This study	Taiwan, Nantou, Renai: Meifeng	104.1	2	yes	10,15,20,25,30,35,40	2.94085e-05	Yes	TW1-(A)	24	SPA0342,H342_1,SPA0344,H344_7,SPA0348,H348_7,SPA0354,SPA0356,SPA0359,H359_1,SPA0366,XI04_S3,H346_1,H347_8,H352_8,H409_8,H411_8,H412_8,H414_8,H415_8,H418_7,H420_8,PD24A	24.092	121.176	2038.6	Plant	Ericales	Pentaphylacaceae	Eurya	1	leaf	H	TW1;CHN-IX	TW1;	SRR15616323
SPA0342	SPA0342	This study	Taiwan, Yilan, Datong: Tuling	178.341	2	yes	30	2.96571e-05	No	TW1-(A)	24	H342_1,SPA0344,H344_7,SPA0348,H348_7,SPA0354,SPA0356,SPA0359,H359_1,SPA0366,XI04_S3,H346_1,H347_8,H352_8,H409_8,H411_8,H412_8,H414_8,H415_8,H418_7,H420_8,PD24A,PD25A	24.4046	121.362	1548	Plant	Fagales	Fagaceae	Lithocarpus	2	leaf	H	TW1;CHN-IX	TW1;	SRR15616272
SPA0344	SPA0344	This study	Taiwan, Yilan, Datong: Tuling	146.324	2	yes	30	2.87458e-05	No	TW1-(A)	24	H344_7,SPA0348,H348_7,SPA0354,SPA0356,SPA0359,H359_1,SPA0366,XI04_S3,H346_1,H347_8,H352_8,H409_8,H411_8,H412_8,H414_8,H415_8,H418_7,H420_8,PD24A,PD25A,SPA0342,H342_1	24.4046	121.362	1566.4	Plant	Fagales	Fagaceae	Lithocarpus	2	soil	H	NA	NA	SRR15616271
SPA0348	SPA0348	This study	Taiwan, Yilan, Datong: Tuling	165.01	2	no	30	2.916e-05	No	TW1-(A)	24	H348_7,SPA0354,SPA0356,SPA0359,H359_1,SPA0366,XI04_S3,H346_1,H347_8,H352_8,H409_8,H411_8,H412_8,H414_8,H415_8,H418_7,H420_8,PD24A,PD25A,SPA0342,H342_1,SPA0344,H344_7	24.4042	121.362	1582.2	Plant	Fagales	Fagaceae	Quercus	2	litter	H	NA	NA	SRR15616270
SPA0354	SPA0354	This study	Taiwan, Yilan, Datong: Tuling	162.317	2	no	30	2.92429e-05	No	TW1-(A)	24	SPA0356,SPA0359,H359_1,SPA0366,XI04_S3,H346_1,H347_8,H352_8,H409_8,H411_8,H412_8,H414_8,H415_8,H418_7,H420_8,PD24A,PD25A,SPA0342,H342_1,SPA0344,H344_7,SPA0348,H348_7	24.4041	121.362	1589.7	Plant	Apiales	Araliaceae	Fatsia	1	petiole	H	NA	NA	SRR15616269
SPA0356	SPA0356	This study	Taiwan, Yilan, Datong: Tuling	146.395	2	no	30	2.916e-05	No	TW1-(A)	24	SPA0359,H359_1,SPA0366,XI04_S3,H346_1,H347_8,H352_8,H409_8,H411_8,H412_8,H414_8,H415_8,H418_7,H420_8,PD24A,PD25A,SPA0342,H342_1,SPA0344,H344_7,SPA0348,H348_7,SPA0354	24.4041	121.363	1590.4	Plant	Apiales	Araliaceae	Fatsia	1	soil	S	NA	NA	SRR15616268
SPA0359	SPA0359	This study	Taiwan, Yilan, Datong: Tuling	157.404	2	no	30	2.89943e-05	No	TW1-(A)	24	H359_1,SPA0366,XI04_S3,H346_1,H347_8,H352_8,H409_8,H411_8,H412_8,H414_8,H415_8,H418_7,H420_8,PD24A,PD25A,SPA0342,H342_1,SPA0344,H344_7,SPA0348,H348_7,SPA0354,SPA0356	24.4041	121.363	1592	Plant	Laurales	Lauraceae	Litsea	2	twig	S	NA	NA	SRR15616267
SPA0366	SPA0366	This study	Taiwan, Yilan, Datong: Trailhead of Mount Nanhu	169.002	2	no	30	3.04855e-05	No	TW1-(A)	24	XI04_S3,H346_1,H347_8,H352_8,H409_8,H411_8,H412_8,H414_8,H415_8,H418_7,H420_8,PD24A,PD25A,SPA0342,H342_1,SPA0344,H344_7,SPA0348,H348_7,SPA0354,SPA0356,SPA0359,H359_1	24.3895	121.354	1928.1	Plant	Fagales	Fagaceae	Quercus	1	soil	S	NA	NA	SRR15616266
XI04	SPA0298	This study	Taiwan, Yilan, Datong: Tuling	98.7346	2	no	30	2.84973e-05	No	TW1-(A)	24	H346_1,H347_8,H352_8,H409_8,H411_8,H412_8,H414_8,H415_8,H418_7,H420_8,PD24A,PD25A,SPA0342,H342_1,SPA0344,H344_7,SPA0348,H348_7,SPA0354,SPA0356,SPA0359,H359_1,SPA0366	24.4043	121.362	1575.06	Plant	Saxifragales	Iteaceae	Itea	1	twig	S	TW1;CHN-IX	TW1;	SRR15616240
H413-8	SPA0413	This study	Taiwan, Yilan, Datong: Tuling	105.241	2	no	10,15,20,25,30,35,40	2.98227e-05	Yes	TW1-(B)	1	NA	24.404	121.363	1604.17	Plant	Apiales	Araliaceae	Fatsia	1	litter	H	TW1;CHN-IX	TW1;	SRR15616260
PD31A	SP00127	This study	Taiwan, Taitung, Dawu: Sanzhuku Recreation Farm	98.1237	2	yes	10,15,20,25,30,35,40	2.63434e-05	Yes	TW2a-(A)	3	PD33A,PD34A,	22.3222	120.878	303.2	Plant	Laurales	Lauraceae	Cinnamomum	1	bark	H	TW2;CHN-V	TW2a;	SRR15616316
PD33A	SP00134	This study	Taiwan, Taitung, Daren: Shouka	107.22	2	yes	30	2.70061e-05	No	TW2a-(A)	3	PD34A,PD31A	22.239	120.855	436.4	Plant	Fagales	Fagaceae	Castanopsis	1	leaf	S	TW2;CHN-V	TW2a;	SRR15616314
PD34A	SP00141	This study	Taiwan, Taitung, Daren: Shouka	102.955	2	no	10,15,20,25,30,35,40	2.85801e-05	No	TW2a-(A)	3	,PD31A,PD33A	22.2407	120.854	439	Plant	Fagales	Fagaceae	Quercus	1	bark	H	TW2;CHN-V	TW2a;	SRR15616313
PD35A	SP00147	This study	Taiwan, Nantou, Puli: Shikeng Road	118.79	2	yes	10,15,20,25,30,35,40	2.60949e-05	Yes	TW2a-(B)	2	PD37B,	23.9901	121.016	554.7	Plant	Fagales	Fagaceae	Castanopsis	4	leaf	S	TW2;CHN-V	CHN-V;	SRR15616312
PD37B	SP00147	This study	Taiwan, Nantou, Puli: Shikeng Road	92.4346	2	no	30	2.69233e-05	No	TW2a-(B)	2	,PD35A	23.9901	121.016	554.7	Plant	Fagales	Fagaceae	Castanopsis	4	fruit abscission	S	TW2;CHN-V	CHN-V;	SRR15616310
SR09	SP00314	This study	Taiwan, Yilan, Yuanshan: Fushan Botanical Garden	44.5569	2	no	30	3.2308e-05	No	TW2a-(C)	4	SR10,SR18,SR19,	24.7622	121.584	645.527	Plant	Fagales	Fagaceae	Quercus	2	bark	H	NA	NA	SRR15616265
SR10	SP00319	This study	Taiwan, Yilan, Yuanshan: Fushan Botanical Garden	53.3011	2	no	10,15,20,25,30,35,40	3.1231e-05	No	TW2a-(C)	4	SR18,SR19,SR09	24.7622	121.585	647.098	Plant	Fagales	Fagaceae	Quercus	1	bark	H	NA	NA	SRR15616264
SR18	SP00314	This study	Taiwan, Yilan, Yuanshan: Fushan Botanical Garden	63.0031	2	yes	10,15,20,25,30,35,40	3.08168e-05	Yes	TW2a-(C)	4	SR19,SR09,SR10	24.7622	121.584	645.527	Plant	Fagales	Fagaceae	Quercus	2	leaf	S	TW2;CHN-V	TW2a;	SRR15616253
SR19	SP00326	This study	Taiwan, Yilan, Yuanshan: Fushan Botanical Garden	61.2206	2	no	30	3.08997e-05	No	TW2a-(C)	4	,SR09,SR10,SR18	24.7622	121.585	626.108	Plant	Fagales	Fagaceae	Quercus	1	leaf	S	TW2;CHN-V	TW2a;	SRR15616252
XI06	SPA0305	This study	Taiwan, Yilan, Datong: Tuling	108.538	2	yes	10,15,20,25,30,35,40	2.59292e-05	Yes	TW2a-(D)	1	NA	24.4046	121.363	1576.46	Plant	Rosales	Ulmaceae	Ulmus	1	leaf	S	TW2;CHN-V	TW2a;	SRR15616239
RG11	SP00277	This study	Taiwan, Yilan, Yuanshan: Fushan Botanical Garden	80.8475	2	no	30	3.83554e-05	No	TW2b	18	SR11,SR12,SR14,SR15,SR16,SR17,SR20,SR21,SR22,S1,S2,S3,S4,S5,S6,S17,S18	24.7629	121.586	657	Plant	Fagales	Fagaceae	Quercus	1	litter	H	NA	NA	SRR15616294
S1	SPA0023	This study	Taiwan, Taipei, Nangang: Academia Sinica	102.367	2	no	30	3.63672e-05	No	TW2b	18	S2,S3,S4,S5,S6,S17,S18,RG11,SR11,SR12,SR14,SR15,SR16,SR17,SR20,SR21,SR22,	25.0453	121.613	90.137	Plant	Ericales	Sapotaceae	Palaquium	1	soil	H	NA	NA	SRR15616282
S17	SPA0144	This study	Taiwan, New Taipei, Xizhi: Qinjin Road	88.6451	2	no	10,15,20,25,30,35,40	3.62843e-05	No	TW2b	18	S18,RG11,SR11,SR12,SR14,SR15,SR16,SR17,SR20,SR21,SR22,S1,S2,S3,S4,S5,S6	25.0371	121.677	490.172	Plant	Ericales	Primulaceae	Ardisia	1	leaf	S	NA	NA	SRR15616285
S18	SPA0145	This study	Taiwan, New Taipei, Xizhi: Qinjin Road	77.9244	2	no	30	3.66157e-05	No	TW2b	18	RG11,SR11,SR12,SR14,SR15,SR16,SR17,SR20,SR21,SR22,S1,S2,S3,S4,S5,S6,S17	25.0371	121.677	490.172	Plant	Polypodiales	Polypodiaceae	Lemmaphyllum	1	whole	H	TW2;CHN-V	TW2b;	SRR15616283
S2	SPA0024	This study	Taiwan, Taipei, Nangang: Academia Sinica	95.8013	2	no	30	3.66157e-05	No	TW2b	18	S3,S4,S5,S6,S17,S18,RG11,SR11,SR12,SR14,SR15,SR16,SR17,SR20,SR21,SR22,S1	25.0453	121.613	90.137	Plant	Sapindales	Sapindaceae	Acer	1	bark	S	NA	NA	SRR15616281
S3	SPA0025	This study	Taiwan, Taipei, Nangang: Academia Sinica	102.883	2	no	30	3.645e-05	No	TW2b	18	S4,S5,S6,S17,S18,RG11,SR11,SR12,SR14,SR15,SR16,SR17,SR20,SR21,SR22,S1,S2	25.0453	121.613	90.137	Plant	Sapindales	Sapindaceae	Koelreuteria	1	litter	H	NA	NA	SRR15616280
S4	SPA0028	This study	Taiwan, Taipei, Nangang: Academia Sinica	102.845	2	no	30	3.62843e-05	No	TW2b	18	S5,S6,S17,S18,RG11,SR11,SR12,SR14,SR15,SR16,SR17,SR20,SR21,SR22,S1,S2,S3	25.0453	121.613	90.137	Plant	Polypodiales	Polypodiaceae	Lemmaphyllum	1	whole	H	NA	NA	SRR15616279
S5	SPA0048	This study	Taiwan, Taipei, Nangang: Nangangshan Hiking Trail	105.629	2	yes	10,15,20,25,30,35,40	3.71956e-05	Yes	TW2b	18	S6,S17,S18,RG11,SR11,SR12,SR14,SR15,SR16,SR17,SR20,SR21,SR22,S1,S2,S3,S4	25.033	121.609	94.898	Plant	Fagales	Fagaceae	Castanopsis	1	litter	S	NA	NA	SRR15616278
S6	SPA0049	This study	Taiwan, Taipei, Nangang: Nangangshan Hiking Trail	76.7654	2	no	10,15,20,25,30,35,40	3.65329e-05	No	TW2b	18	S17,S18,RG11,SR11,SR12,SR14,SR15,SR16,SR17,SR20,SR21,SR22,S1,S2,S3,S4,S5	25.033	121.609	55.467	Plant	Fagales	Fagaceae	Quercus	1	soil	H	NA	NA	SRR15616277
SR11	SP00324	This study	Taiwan, Yilan, Yuanshan: Fushan Botanical Garden	65.6158	2	no	30	3.90181e-05	No	TW2b	18	SR12,SR14,SR15,SR16,SR17,SR20,SR21,SR22,S1,S2,S3,S4,S5,S6,S17,S18,RG11	24.7624	121.585	646.304	Plant	Fagales	Fagaceae	Quercus	2	bark	H	NA	NA	SRR15616263
SR12	SP00299	This study	Taiwan, Yilan, Yuanshan: Fushan Botanical Garden	58.0919	2	no	30	3.98465e-05	No	TW2b	18	SR14,SR15,SR16,SR17,SR20,SR21,SR22,S1,S2,S3,S4,S5,S6,S17,S18,RG11,SR11	24.7622	121.585	646.343	Plant	Fagales	Fagaceae	Lithocarpus	1	leaf	H	TW2;CHN-V	TW2b;	SRR15616259
SR14	SP00318	This study	Taiwan, Yilan, Yuanshan: Fushan Botanical Garden	66.2389	2	no	30	4.00122e-05	No	TW2b	18	SR15,SR16,SR17,SR20,SR21,SR22,S1,S2,S3,S4,S5,S6,S17,S18,RG11,SR11,SR12	24.7625	121.585	653.654	Plant	Fagales	Fagaceae	Quercus	2	leaf	H	NA	NA	SRR15616257
SR15	SP00324	This study	Taiwan, Yilan, Yuanshan: Fushan Botanical Garden	64.1244	2	no	30	3.88524e-05	No	TW2b	18	SR16,SR17,SR20,SR21,SR22,S1,S2,S3,S4,S5,S6,S17,S18,RG11,SR11,SR12,SR14	24.7624	121.585	646.304	Plant	Fagales	Fagaceae	Quercus	2	leaf	H	NA	NA	SRR15616256
SR16	SP00328	This study	Taiwan, Yilan, Yuanshan: Fushan Botanical Garden	62.7994	2	no	30	3.89352e-05	No	TW2b	18	SR17,SR20,SR21,SR22,S1,S2,S3,S4,S5,S6,S17,S18,RG11,SR11,SR12,SR14,SR15	24.7626	121.586	653.052	Plant	Fagales	Fagaceae	Lithocarpus	1	leaf	H	TW2;CHN-V	TW2b;	SRR15616255
SR17	SP00297	This study	Taiwan, Yilan, Yuanshan: Fushan Botanical Garden	52.0008	2	no	30	4.05921e-05	No	TW2b	18	SR20,SR21,SR22,S1,S2,S3,S4,S5,S6,S17,S18,RG11,SR11,SR12,SR14,SR15,SR16	24.7624	121.585	647.093	Plant	Fagales	Fagaceae	Lithocarpus	1	flower	H	NA	NA	SRR15616254
SR20	SP00318	This study	Taiwan, Yilan, Yuanshan: Fushan Botanical Garden	66.0346	2	no	30	3.86039e-05	No	TW2b	18	SR21,SR22,S1,S2,S3,S4,S5,S6,S17,S18,RG11,SR11,SR12,SR14,SR15,SR16,SR17	24.7625	121.585	653.654	Plant	Fagales	Fagaceae	Quercus	2	bark	H	NA	NA	SRR15616251
SR21	SP00320	This study	Taiwan, Yilan, Yuanshan: Fushan Botanical Garden	65.5139	2	no	30	3.92666e-05	No	TW2b	18	SR22,S1,S2,S3,S4,S5,S6,S17,S18,RG11,SR11,SR12,SR14,SR15,SR16,SR17,SR20	24.7621	121.585	643.063	Plant	Fagales	Fagaceae	Quercus	1	bark	H	NA	NA	SRR15616250
SR22	SP00286	This study	Taiwan, Yilan, Yuanshan: Fushan Botanical Garden	66.1818	2	no	30	3.97637e-05	No	TW2b	18	,S1,S2,S3,S4,S5,S6,S17,S18,RG11,SR11,SR12,SR14,SR15,SR16,SR17,SR20,SR21	24.7618	121.584	645.5	Plant	Fagales	Fagaceae	Castanopsis	1	leaf	S	NA	NA	SRR15616248
RG06	SP00171	This study	Taiwan, Pingtung, Majia: Litingshan	72.7242	2	yes	10,15,20,25,30,35,40	2.38582e-05	Yes	TW3-(A)	2	RG08,	22.6497	120.638	335.7	Plant	Ericales	Primulaceae	Ardisia	1	fruit	H	TW3;	TW3a;CHN-VI/VII.2a	SRR15616299
RG08	SP00191	This study	Taiwan, Pingtung, Fangliao: Dahan Forest Road	124.926	2	no	10,15,20,25,30,35,40	2.36097e-05	No	TW3-(A)	2	,RG06	22.4171	120.705	822.3	Plant	Fagales	Fagaceae	Quercus	1	bark	H	TW3;	TW3a;CHN-VI/VII.2a	SRR15616298
SR26	SP00344	This study	Taiwan, Nantou, Puli: Shikeng Road	66.6803	2	no	10,15,20,25,30,35,40	2.916e-05	Yes	TW3-(B)	1	NA	24.0007	121.01	949	Plant	Fagales	Fagaceae	Quercus	1	fruit	H	TW3;	TW3a;CHN-VI/VII.2a	SRR15616244
SR27	SP00353	This study	Taiwan, Nantou, Yuchih: Lianhuachi Research Center	59.9233	2	no	10,15,20,25,30,35,40	4.09234e-05	Yes	TW3-(C)	1	NA	23.9231	120.892	689.5	Plant	Fagales	Fagaceae	Castanopsis	2	bark	H	TW3;	TW3b;	SRR15616243
SR28	SP00353	This study	Taiwan, Nantou, Yuchih: Lianhuachi Research Center	66.3906	2	no	10,15,20,25,30,35,40	3.77755e-05	Yes	TW3-(D)	1	NA	23.9231	120.892	689.5	Plant	Fagales	Fagaceae	Castanopsis	2	leaf	H	TW3;	TW3b;	SRR15616242
PD40A	SP00153	This study	Taiwan, Nantou, Puli: National Chi Nan University	97.2234	2	yes	10,15,20,25,30,35,40	4.20004e-05	Yes	TW3-(E)	1	NA	23.9512	120.924	587.7	Plant	Fagales	Fagaceae	Quercus	1	bark	S	TW3;	TW3b;	SRR15616307
LY0177	LY0177	This study	Taiwan, Taichung, Heping: Wuling farm	149.921	2	no	10,15,20,25,30,35,40	3.38819e-05	No	TW4-(A)	4	LY0197,LY0200,LY0215,	24.398	121.308	2100	Symbiosis	Peltigera	Peltigerales	Peltigeraceae	1	lichen	S	African_palm_wine;TW4	TW4;	SRR15616233
LY0197	LY0197	This study	Taiwan, Taichung, Heping: Wuling farm	138.201	2	no	30	3.42961e-05	No	TW4-(A)	4	LY0200,LY0215,LY0177	24.398	121.308	2100	Symbiosis	Parmotrema	lecanorales	Parmeliaceae	1	lichen	S	African_palm_wine;TW4	TW4;	SRR15616232
LY0200	LY0200	This study	Taiwan, Taichung, Heping: Wuling farm	143.866	2	no	30	3.33849e-05	No	TW4-(A)	4	LY0215,LY0177,LY0197	24.398	121.308	2100	Symbiosis	Heterodermia	Teloschistales	Physciaceae	1	lichen	H	African_palm_wine;TW4	TW4;	SRR15616231
LY0215	LY0215	This study	Taiwan, Taichung, Heping: Wuling farm	157.108	2	yes	10,15,20,25,30,35,40	3.35506e-05	Yes	TW4-(A)	4	,LY0177,LY0197,LY0200	24.398	121.308	2100	Symbiosis	Cladia	Lecanorales	Cladoniaceae	1	lichen	S	African_palm_wine;TW4	TW4;	SRR15616351
PD36A	SP00147	This study	Taiwan, Nantou, Puli: Shikeng Road	106.436	3	yes	10,15,20,25,30,35,40	3.24736e-05	Yes	TW4-(B)	1	NA	23.9901	121.016	554.7	Plant	Fagales	Fagaceae	Castanopsis	4	fruit abscission	H	African_palm_wine;TW4	TW4;	SRR15616311
H416-8	SPA0416	This study	Taiwan, Yilan, Datong: Tuling	160.842	2	no	30	3.2805e-05	Yes	TW4-(C)	1	NA	24.4039	121.363	1609.26	Plant	Laurales	Lauraceae	Actinodaphne	1	litter	H	African_palm_wine;TW4	TW4;	SRR15616236
PD01B	SP00001	This study	Taiwan, Taipei, Daan: National Taiwan University campus	55.2053	2	no		2.96571e-05	No	TW5-(A)	22	PD02A,PD03A,PD04A,PD05B,PD06A,PD07A,PD08A,PD09A,PD10A,PD11A,PD12A,PD13B,PD14A,PD15A,PD16A,PD17A,PD18A,PD19A,PD20A,PD22A,PD23A,	25.017	121.537	0	Plant	Fagales	Fagaceae	Quercus	3	soil	W	NA	NA	SRR15616349
PD02A	SP00002	This study	Taiwan, Taipei, Daan: National Taiwan University campus	57.8338	2	no	30	3.13967e-05	No	TW5-(A)	22	PD03A,PD04A,PD05B,PD06A,PD07A,PD08A,PD09A,PD10A,PD11A,PD12A,PD13B,PD14A,PD15A,PD16A,PD17A,PD18A,PD19A,PD20A,PD22A,PD23A,PD01B	25.0177	121.538	0	Plant	Fagales	Fagaceae	Quercus	6	soil	W	NA	NA	SRR15616348
PD03A	SP00005	This study	Taiwan, Taipei, Daan: National Taiwan University campus	42.1465	2	no		3.04026e-05	No	TW5-(A)	22	PD04A,PD05B,PD06A,PD07A,PD08A,PD09A,PD10A,PD11A,PD12A,PD13B,PD14A,PD15A,PD16A,PD17A,PD18A,PD19A,PD20A,PD22A,PD23A,PD01B,PD02A	25.0202	121.544	0	Plant	Fagales	Fagaceae	Quercus	10	soil	W	NA	NA	SRR15616347
PD04A	SP00005	This study	Taiwan, Taipei, Daan: National Taiwan University campus	37.2608	2	no	30	3.13967e-05	No	TW5-(A)	22	PD05B,PD06A,PD07A,PD08A,PD09A,PD10A,PD11A,PD12A,PD13B,PD14A,PD15A,PD16A,PD17A,PD18A,PD19A,PD20A,PD22A,PD23A,PD01B,PD02A,PD03A	25.0202	121.544	0	Plant	Fagales	Fagaceae	Quercus	10	twig	W	NA	NA	SRR15616346
PD05B	SP00005	This study	Taiwan, Taipei, Daan: National Taiwan University campus	96.8402	2	no		3.2308e-05	No	TW5-(A)	22	PD06A,PD07A,PD08A,PD09A,PD10A,PD11A,PD12A,PD13B,PD14A,PD15A,PD16A,PD17A,PD18A,PD19A,PD20A,PD22A,PD23A,PD01B,PD02A,PD03A,PD04A	25.0202	121.544	0	Plant	Fagales	Fagaceae	Quercus	10	litter	S	NA	NA	SRR15616345
PD06A	SP00005	This study	Taiwan, Taipei, Daan: National Taiwan University campus	40.0905	2	no		3.02369e-05	No	TW5-(A)	22	PD07A,PD08A,PD09A,PD10A,PD11A,PD12A,PD13B,PD14A,PD15A,PD16A,PD17A,PD18A,PD19A,PD20A,PD22A,PD23A,PD01B,PD02A,PD03A,PD04A,PD05B	25.0202	121.544	0	Plant	Fagales	Fagaceae	Quercus	10	soil	S	TW5;	TW5;	SRR15616344
PD07A	SP00002	This study	Taiwan, Taipei, Daan: National Taiwan University campus	97.2823	2	no		3.25565e-05	No	TW5-(A)	22	PD08A,PD09A,PD10A,PD11A,PD12A,PD13B,PD14A,PD15A,PD16A,PD17A,PD18A,PD19A,PD20A,PD22A,PD23A,PD01B,PD02A,PD03A,PD04A,PD05B,PD06A	25.0177	121.538	0	Plant	Fagales	Fagaceae	Quercus	6	soil	H	NA	NA	SRR15616343
PD08A	SP00005	This study	Taiwan, Taipei, Daan: National Taiwan University campus	94.9303	2	no		3.26393e-05	No	TW5-(A)	22	PD09A,PD10A,PD11A,PD12A,PD13B,PD14A,PD15A,PD16A,PD17A,PD18A,PD19A,PD20A,PD22A,PD23A,PD01B,PD02A,PD03A,PD04A,PD05B,PD06A,PD07A	25.0202	121.544	0	Plant	Fagales	Fagaceae	Quercus	10	litter	H	NA	NA	SRR15616342
PD09A	SP00005	This study	Taiwan, Taipei, Daan: National Taiwan University campus	37.4293	2	no	30	3.1231e-05	No	TW5-(A)	22	PD10A,PD11A,PD12A,PD13B,PD14A,PD15A,PD16A,PD17A,PD18A,PD19A,PD20A,PD22A,PD23A,PD01B,PD02A,PD03A,PD04A,PD05B,PD06A,PD07A,PD08A	25.0202	121.544	0	Plant	Fagales	Fagaceae	Quercus	10	soil	H	NA	NA	SRR15616341
PD10A	SP00005	This study	Taiwan, Taipei, Daan: National Taiwan University campus	46.2381	2	no	30	3.01541e-05	No	TW5-(A)	22	PD11A,PD12A,PD13B,PD14A,PD15A,PD16A,PD17A,PD18A,PD19A,PD20A,PD22A,PD23A,PD01B,PD02A,PD03A,PD04A,PD05B,PD06A,PD07A,PD08A,PD09A	25.0202	121.544	0	Plant	Fagales	Fagaceae	Quercus	10	twig	H	NA	NA	SRR15616340
PD11A	SP00002	This study	Taiwan, Taipei, Daan: National Taiwan University campus	40.555	2	no		3.13967e-05	No	TW5-(A)	22	PD12A,PD13B,PD14A,PD15A,PD16A,PD17A,PD18A,PD19A,PD20A,PD22A,PD23A,PD01B,PD02A,PD03A,PD04A,PD05B,PD06A,PD07A,PD08A,PD09A,PD10A	25.0177	121.538	0	Plant	Fagales	Fagaceae	Quercus	6	soil	L	TW5;	TW5;	SRR15616338
PD12A	SP00005	This study	Taiwan, Taipei, Daan: National Taiwan University campus	35.66	2	no	10,15,20,25,30,35,40	3.11482e-05	No	TW5-(A)	22	PD13B,PD14A,PD15A,PD16A,PD17A,PD18A,PD19A,PD20A,PD22A,PD23A,PD01B,PD02A,PD03A,PD04A,PD05B,PD06A,PD07A,PD08A,PD09A,PD10A,PD11A	25.0202	121.544	0	Plant	Fagales	Fagaceae	Quercus	10	soil	L	NA	NA	SRR15616337
PD13B	SP00005	This study	Taiwan, Taipei, Daan: National Taiwan University campus	31.9663	2	no	30	3.23908e-05	No	TW5-(A)	22	PD14A,PD15A,PD16A,PD17A,PD18A,PD19A,PD20A,PD22A,PD23A,PD01B,PD02A,PD03A,PD04A,PD05B,PD06A,PD07A,PD08A,PD09A,PD10A,PD11A,PD12A	25.0202	121.544	0	Plant	Fagales	Fagaceae	Quercus	10	twig	L	NA	NA	SRR15616336
PD14A	SP00003	This study	Taiwan, Taipei, Daan: National Taiwan University campus	102.023	2	no	30	3.22251e-05	No	TW5-(A)	22	PD15A,PD16A,PD17A,PD18A,PD19A,PD20A,PD22A,PD23A,PD01B,PD02A,PD03A,PD04A,PD05B,PD06A,PD07A,PD08A,PD09A,PD10A,PD11A,PD12A,PD13B	25.018	121.542	0	Plant	Fagales	Fagaceae	Quercus	2	litter	W	TW5;	TW5;	SRR15616335
PD15A	SP00001	This study	Taiwan, Taipei, Daan: National Taiwan University campus	102.256	2	yes	10,15,20,25,30,35,40	3.17281e-05	Yes	TW5-(A)	22	PD16A,PD17A,PD18A,PD19A,PD20A,PD22A,PD23A,PD01B,PD02A,PD03A,PD04A,PD05B,PD06A,PD07A,PD08A,PD09A,PD10A,PD11A,PD12A,PD13B,PD14A	25.017	121.537	0	Plant	Fagales	Fagaceae	Quercus	3	bark	S	TW5;	TW5;	SRR15616334
PD16A	SP00002	This study	Taiwan, Taipei, Daan: National Taiwan University campus	34.9262	2	no	30	3.10654e-05	No	TW5-(A)	22	PD17A,PD18A,PD19A,PD20A,PD22A,PD23A,PD01B,PD02A,PD03A,PD04A,PD05B,PD06A,PD07A,PD08A,PD09A,PD10A,PD11A,PD12A,PD13B,PD14A,PD15A	25.0177	121.538	0	Plant	Fagales	Fagaceae	Quercus	6	litter	S	NA	NA	SRR15616333
PD17A	SP00002	This study	Taiwan, Taipei, Daan: National Taiwan University campus	37.6538	2	no	30	3.14796e-05	No	TW5-(A)	22	PD18A,PD19A,PD20A,PD22A,PD23A,PD01B,PD02A,PD03A,PD04A,PD05B,PD06A,PD07A,PD08A,PD09A,PD10A,PD11A,PD12A,PD13B,PD14A,PD15A,PD16A	25.0177	121.538	0	Plant	Fagales	Fagaceae	Quercus	6	soil	S	NA	NA	SRR15616332
PD18A	SP00003	This study	Taiwan, Taipei, Daan: National Taiwan University campus	38.92	2	no	30	3.0734e-05	No	TW5-(A)	22	PD19A,PD20A,PD22A,PD23A,PD01B,PD02A,PD03A,PD04A,PD05B,PD06A,PD07A,PD08A,PD09A,PD10A,PD11A,PD12A,PD13B,PD14A,PD15A,PD16A,PD17A	25.018	121.542	0	Plant	Fagales	Fagaceae	Quercus	2	twig	S	NA	NA	SRR15616331
PD19A	SP00004	This study	Taiwan, Taipei, Daan: National Taiwan University campus	98.7271	2	no	30	3.29707e-05	No	TW5-(A)	22	PD20A,PD22A,PD23A,PD01B,PD02A,PD03A,PD04A,PD05B,PD06A,PD07A,PD08A,PD09A,PD10A,PD11A,PD12A,PD13B,PD14A,PD15A,PD16A,PD17A,PD18A	25.0207	121.543	0	Plant	Fagales	Fagaceae	Quercus	2	litter	S	NA	NA	SRR15616330
PD20A	SP00005	This study	Taiwan, Taipei, Daan: National Taiwan University campus	32.7839	2	no	30	3.11482e-05	No	TW5-(A)	22	PD22A,PD23A,PD01B,PD02A,PD03A,PD04A,PD05B,PD06A,PD07A,PD08A,PD09A,PD10A,PD11A,PD12A,PD13B,PD14A,PD15A,PD16A,PD17A,PD18A,PD19A	25.0202	121.544	0	Plant	Fagales	Fagaceae	Quercus	10	twig	S	NA	NA	SRR15616329
PD22A	SP00002	This study	Taiwan, Taipei, Daan: National Taiwan University campus	33.8841	2	no	30	3.06511e-05	No	TW5-(A)	22	PD23A,PD01B,PD02A,PD03A,PD04A,PD05B,PD06A,PD07A,PD08A,PD09A,PD10A,PD11A,PD12A,PD13B,PD14A,PD15A,PD16A,PD17A,PD18A,PD19A,PD20A	25.0177	121.538	0	Plant	Fagales	Fagaceae	Quercus	6	litter	H	NA	NA	SRR15616326
PD23A	SP00001	This study	Taiwan, Taipei, Daan: National Taiwan University campus	36.8992	2	no	30	3.05683e-05	No	TW5-(A)	22	,PD01B,PD02A,PD03A,PD04A,PD05B,PD06A,PD07A,PD08A,PD09A,PD10A,PD11A,PD12A,PD13B,PD14A,PD15A,PD16A,PD17A,PD18A,PD19A,PD20A,PD22A	25.017	121.537	0	Plant	Fagales	Fagaceae	Quercus	3	soil	L	NA	NA	SRR15616325
PD21B	SP00004	This study	Taiwan, Taipei, Daan: National Taiwan University campus	36.4536	2	yes	10,15,20,25,30,35,40	3.03198e-05	Yes	TW5-(B)	1	NA	25.0207	121.543	0	Plant	Fagales	Fagaceae	Quercus	2	twig	L	TW5;	TW5;	SRR15616327
[1] To better distinguish isolates names from each previous studies, we use strain name from this study and Duan et a.,2018. We used Run ID on NCBI SRA for Barbosa et al.,2015; Peter et al.,2018; and Pontes et al., 2019.
[2] For isolate collection in each previous study, see:
Table S1 in Barbosa, R. et al. Evidence of natural hybridization in Brazilian wild lineages of Saccharomyces cerevisiae. Genome Biology and Evolution 8, 317-329(2015)
Table S1 in Peter, J. et al. Genome evolution across 1,011 Saccharomyces cerevisiae isolates. Nature 556, 339-344(2018)
Supplementary Data 1 in Duan, S. F. et al. The origin and adaptive evolution of domesticated populations of yeast from Far East Asia. Nat Commun 9:2690(2018)
Table S1 in Pontes, A., Čadež, N., Gonçalves, P. & Sampaio, J. P. A Quasi-Domesticate Relic Hybrid Population of Saccharomyces cerevisiae × S. Paradoxus Adapted to Olive Brine. Frontiers in Genetics 10,449(2019)
[3]Ploidy level determined from PI stained cells using flow cytometry in this study
[4]We take 5% of the median number of pairwise nuclotide difference(36000bp), 1800 pairwise difference as cut-off for clonal pairs

## Sheet: S7
Supplemental Table S7. The 340 isolates, their phylogenetic groups and the lineages corresponding to their top three major components estimated by ADMIXTURE.
Sample_ID	Phylogenetic group	Taiwanese isolate	ADMIXTURE K=16								ADMIXTURE K=29
			First component	%First component	Second component	%Second component	Third component	%Third component	Used in Treemix	Assigned group in Treemix	First component	%First component	Second component	%Second component	Third component	%Third component	Used in Treemix	Assigned group in Treemix
BJ15	CHN-IV	No	CHN-IV;	0.99985	CHN-III;CHN-VI/VII.1	1e-05	Qingkejiu;Sake	1e-05	yes	CHN-IV;	CHN-IV;	0.99972	Mediterranean_oak;	1e-05	CHN-III;	1e-05	yes	CHN-IV;
BJ21	CHN-IV	No	CHN-IV;	0.99985	CHN-III;CHN-VI/VII.1	1e-05	Qingkejiu;Sake	1e-05	yes	CHN-IV;	CHN-IV;	0.99972	Mediterranean_oak;	1e-05	CHN-III;	1e-05	yes	CHN-IV;
BJ22	CHN-IV	No	CHN-IV;	0.99985	CHN-III;CHN-VI/VII.1	1e-05	Qingkejiu;Sake	1e-05	yes	CHN-IV;	CHN-IV;	0.99972	Mediterranean_oak;	1e-05	CHN-III;	1e-05	yes	CHN-IV;
BJ24	CHN-IV	No	CHN-IV;	0.99985	CHN-III;CHN-VI/VII.1	1e-05	Qingkejiu;Sake	1e-05	yes	CHN-IV;	CHN-IV;	0.99972	Mediterranean_oak;	1e-05	CHN-III;	1e-05	yes	CHN-IV;
BJ3	CHN-IV	No	CHN-IV;	0.99985	CHN-III;CHN-VI/VII.1	1e-05	Qingkejiu;Sake	1e-05	yes	CHN-IV;	CHN-IV;	0.99972	Mediterranean_oak;	1e-05	CHN-III;	1e-05	yes	CHN-IV;
BJ6	CHN-IV	No	CHN-IV;	0.99985	CHN-III;CHN-VI/VII.1	1e-05	Qingkejiu;Sake	1e-05	yes	CHN-IV;	CHN-IV;	0.99972	Mediterranean_oak;	1e-05	CHN-III;	1e-05	yes	CHN-IV;
BTP1	Huangjiu	No	Asian_fermentation;Baijiu	0.99985	CHN-III;CHN-VI/VII.1	1e-05	Qingkejiu;Sake	1e-05	yes	Asian_fermentation;Baijiu	Asian_fermentation;Baijiu	0.99972	Mediterranean_oak;	1e-05	CHN-III;	1e-05	yes	Asian_fermentation;Baijiu
ERR1111487	Brazilian	No	Brazilian;	0.99985	CHN-III;CHN-VI/VII.1	1e-05	Qingkejiu;Sake	1e-05	yes	Brazilian;	Brazilian;	0.99972	Mediterranean_oak;	1e-05	CHN-III;	1e-05	yes	Brazilian;
ERR1111491	Brazilian	No	Brazilian;	0.99985	CHN-III;CHN-VI/VII.1	1e-05	Qingkejiu;Sake	1e-05	yes	Brazilian;	Brazilian;	0.99972	Mediterranean_oak;	1e-05	CHN-III;	1e-05	yes	Brazilian;
ERR1111492	Brazilian	No	Brazilian;	0.99985	CHN-III;CHN-VI/VII.1	1e-05	Qingkejiu;Sake	1e-05	yes	Brazilian;	Brazilian;	0.99972	Mediterranean_oak;	1e-05	CHN-III;	1e-05	yes	Brazilian;
ERR1111500	Brazilian	No	Brazilian;	0.99985	CHN-III;CHN-VI/VII.1	1e-05	Qingkejiu;Sake	1e-05	yes	Brazilian;	Brazilian;	0.99972	Mediterranean_oak;	1e-05	CHN-III;	1e-05	yes	Brazilian;
ERR1111501	Brazilian	No	Brazilian;	0.99985	CHN-III;CHN-VI/VII.1	1e-05	Qingkejiu;Sake	1e-05	yes	Brazilian;	Brazilian;	0.99972	Mediterranean_oak;	1e-05	CHN-III;	1e-05	yes	Brazilian;
ERR1308663	CHN-III	No	CHN-III;CHN-VI/VII.1	0.99985	Qingkejiu;Sake	1e-05	Asian_fermentation;Baijiu	1e-05	yes	CHN-III;CHN-VI/VII.1	CHN-III;	0.99972	Mediterranean_oak;	1e-05	CHN-VIII;	1e-05	yes	CHN-III;
ERR1308704	TW4	Yes	African_palm_wine;TW4	0.99985	CHN-III;CHN-VI/VII.1	1e-05	Qingkejiu;Sake	1e-05	yes	African_palm_wine;TW4	TW4;	0.99972	Mediterranean_oak;	1e-05	CHN-III;	1e-05	yes	TW4;
ERR1308705	Wine/European	No	Wine/European;Olive_brine	0.99985	CHN-III;CHN-VI/VII.1	1e-05	Qingkejiu;Sake	1e-05	yes	Wine/European;Olive_brine	Wine/European;	0.99972	Mediterranean_oak;	1e-05	CHN-III;	1e-05	yes	Wine/European;
ERR1308709	Wine/European	No	Wine/European;Olive_brine	0.99985	CHN-III;CHN-VI/VII.1	1e-05	Qingkejiu;Sake	1e-05	yes	Wine/European;Olive_brine	Wine/European;	0.99972	Mediterranean_oak;	1e-05	CHN-III;	1e-05	yes	Wine/European;
ERR1308745	Asian_fermentation	No	Asian_fermentation;Baijiu	0.99985	CHN-III;CHN-VI/VII.1	1e-05	Qingkejiu;Sake	1e-05	yes	Asian_fermentation;Baijiu	Asian_fermentation;Baijiu	0.99972	Mediterranean_oak;	1e-05	CHN-III;	1e-05	yes	Asian_fermentation;Baijiu
ERR1308751	African_beer	No	African_beer;	0.99985	CHN-III;CHN-VI/VII.1	1e-05	Qingkejiu;Sake	1e-05	yes	African_beer;	African_beer;	0.99972	Mediterranean_oak;	1e-05	CHN-III;	1e-05	yes	African_beer;
ERR1308755	Wine/European	No	Wine/European;Olive_brine	0.99985	CHN-III;CHN-VI/VII.1	1e-05	Qingkejiu;Sake	1e-05	yes	Wine/European;Olive_brine	Wine/European;	0.99972	Mediterranean_oak;	1e-05	CHN-III;	1e-05	yes	Wine/European;
ERR1308764	Wine/European	No	Wine/European;Olive_brine	0.99985	CHN-III;CHN-VI/VII.1	1e-05	Qingkejiu;Sake	1e-05	yes	Wine/European;Olive_brine	Wine/European;	0.99972	Mediterranean_oak;	1e-05	CHN-III;	1e-05	yes	Wine/European;
ERR1308780	African_beer	No	African_beer;	0.99985	CHN-III;CHN-VI/VII.1	1e-05	Qingkejiu;Sake	1e-05	yes	African_beer;	African_beer;	0.99972	Mediterranean_oak;	1e-05	CHN-III;	1e-05	yes	African_beer;
ERR1308821	Wine/European	No	Wine/European;Olive_brine	0.99985	CHN-III;CHN-VI/VII.1	1e-05	Qingkejiu;Sake	1e-05	yes	Wine/European;Olive_brine	Wine/European;	0.99972	Mediterranean_oak;	1e-05	CHN-III;	1e-05	yes	Wine/European;
ERR1308846	Wine/European	No	Wine/European;Olive_brine	0.99985	CHN-III;CHN-VI/VII.1	1e-05	Qingkejiu;Sake	1e-05	yes	Wine/European;Olive_brine	Wine/European;	0.99972	Mediterranean_oak;	1e-05	CHN-III;	1e-05	yes	Wine/European;
ERR1308872	Asian_fermentation	No	Asian_fermentation;Baijiu	0.99985	CHN-III;CHN-VI/VII.1	1e-05	Qingkejiu;Sake	1e-05	yes	Asian_fermentation;Baijiu	Asian_fermentation;Baijiu	0.99972	Mediterranean_oak;	1e-05	CHN-III;	1e-05	yes	Asian_fermentation;Baijiu
ERR1308873	Sake	No	Qingkejiu;Sake	0.99985	CHN-III;CHN-VI/VII.1	1e-05	Asian_fermentation;Baijiu	1e-05	yes	Qingkejiu;Sake	Sake;	0.99972	Mediterranean_oak;	1e-05	CHN-III;	1e-05	yes	Sake;
ERR1308937	Sake	No	Qingkejiu;Sake	0.99985	CHN-III;CHN-VI/VII.1	1e-05	Asian_fermentation;Baijiu	1e-05	yes	Qingkejiu;Sake	Sake;	0.99972	Mediterranean_oak;	1e-05	CHN-III;	1e-05	yes	Sake;
ERR1308963	African_palm_wine	No	African_palm_wine;TW4	0.99985	CHN-III;CHN-VI/VII.1	1e-05	Qingkejiu;Sake	1e-05	yes	African_palm_wine;TW4	African_palm_wine;	0.99972	Mediterranean_oak;	1e-05	CHN-III;	1e-05	yes	African_palm_wine;
ERR1308966	Wine/European	No	Wine/European;Olive_brine	0.99985	CHN-III;CHN-VI/VII.1	1e-05	Qingkejiu;Sake	1e-05	yes	Wine/European;Olive_brine	Wine/European;	0.99972	Mediterranean_oak;	1e-05	CHN-III;	1e-05	yes	Wine/European;
ERR1309012	Wine/European	No	Wine/European;Olive_brine	0.99985	CHN-III;CHN-VI/VII.1	1e-05	Qingkejiu;Sake	1e-05	yes	Wine/European;Olive_brine	Wine/European;	0.99972	Mediterranean_oak;	1e-05	CHN-III;	1e-05	yes	Wine/European;
ERR1309029	Sake	No	Qingkejiu;Sake	0.99985	CHN-III;CHN-VI/VII.1	1e-05	Asian_fermentation;Baijiu	1e-05	yes	Qingkejiu;Sake	Sake;	0.99972	Mediterranean_oak;	1e-05	CHN-III;	1e-05	yes	Sake;
ERR1309052	Mediterranean_oak	No	Mediterranean_oak;	0.99985	CHN-III;CHN-VI/VII.1	1e-05	Qingkejiu;Sake	1e-05	yes	Mediterranean_oak;	Mediterranean_oak;	0.99972	CHN-III;	1e-05	CHN-VIII;	1e-05	yes	Mediterranean_oak;
ERR1309087	Asian_fermentation	No	Asian_fermentation;Baijiu	0.99985	CHN-III;CHN-VI/VII.1	1e-05	Qingkejiu;Sake	1e-05	yes	Asian_fermentation;Baijiu	Asian_fermentation;Baijiu	0.99972	Mediterranean_oak;	1e-05	CHN-III;	1e-05	yes	Asian_fermentation;Baijiu
ERR1309143	Wine/European	Yes	Wine/European;Olive_brine	0.99985	CHN-III;CHN-VI/VII.1	1e-05	Qingkejiu;Sake	1e-05	yes	Wine/European;Olive_brine	Wine/European;	0.99972	Mediterranean_oak;	1e-05	CHN-III;	1e-05	yes	Wine/European;
ERR1309165	African_beer	No	African_beer;	0.99985	CHN-III;CHN-VI/VII.1	1e-05	Qingkejiu;Sake	1e-05	yes	African_beer;	African_beer;	0.99972	Mediterranean_oak;	1e-05	CHN-III;	1e-05	yes	African_beer;
ERR1309221	Wine/European	No	Wine/European;Olive_brine	0.99985	CHN-III;CHN-VI/VII.1	1e-05	Qingkejiu;Sake	1e-05	yes	Wine/European;Olive_brine	Wine/European;	0.99972	Mediterranean_oak;	1e-05	CHN-III;	1e-05	yes	Wine/European;
ERR1309227	Wine/European	No	Wine/European;Olive_brine	0.99985	CHN-III;CHN-VI/VII.1	1e-05	Qingkejiu;Sake	1e-05	yes	Wine/European;Olive_brine	Wine/European;	0.99972	Mediterranean_oak;	1e-05	CHN-III;	1e-05	yes	Wine/European;
ERR1309231	African_palm_wine	No	African_palm_wine;TW4	0.99985	CHN-III;CHN-VI/VII.1	1e-05	Qingkejiu;Sake	1e-05	yes	African_palm_wine;TW4	African_palm_wine;	0.99972	Mediterranean_oak;	1e-05	CHN-III;	1e-05	yes	African_palm_wine;
ERR1309245	Wine/European	No	Wine/European;Olive_brine	0.99985	CHN-III;CHN-VI/VII.1	1e-05	Qingkejiu;Sake	1e-05	yes	Wine/European;Olive_brine	Wine/European;	0.99972	Mediterranean_oak;	1e-05	CHN-III;	1e-05	yes	Wine/European;
ERR1309246	Wine/European	No	Wine/European;Olive_brine	0.99985	CHN-III;CHN-VI/VII.1	1e-05	Qingkejiu;Sake	1e-05	yes	Wine/European;Olive_brine	Wine/European;	0.99972	Mediterranean_oak;	1e-05	CHN-III;	1e-05	yes	Wine/European;
ERR1309248	Mediterranean_oak	No	Mediterranean_oak;	0.99985	CHN-III;CHN-VI/VII.1	1e-05	Qingkejiu;Sake	1e-05	yes	Mediterranean_oak;	Mediterranean_oak;	0.99972	CHN-III;	1e-05	CHN-VIII;	1e-05	yes	Mediterranean_oak;
ERR1309252	Wine/European	No	Wine/European;Olive_brine	0.99985	CHN-III;CHN-VI/VII.1	1e-05	Qingkejiu;Sake	1e-05	yes	Wine/European;Olive_brine	Wine/European;	0.99972	Mediterranean_oak;	1e-05	CHN-III;	1e-05	yes	Wine/European;
ERR1309256	Mediterranean_oak	No	Mediterranean_oak;	0.99985	CHN-III;CHN-VI/VII.1	1e-05	Qingkejiu;Sake	1e-05	yes	Mediterranean_oak;	Mediterranean_oak;	0.99972	CHN-III;	1e-05	CHN-VIII;	1e-05	yes	Mediterranean_oak;
ERR1309286	Wine/European	No	Wine/European;Olive_brine	0.99985	CHN-III;CHN-VI/VII.1	1e-05	Qingkejiu;Sake	1e-05	yes	Wine/European;Olive_brine	Wine/European;	0.99972	Mediterranean_oak;	1e-05	CHN-III;	1e-05	yes	Wine/European;
ERR1309335	TW4	Yes	African_palm_wine;TW4	0.99985	CHN-III;CHN-VI/VII.1	1e-05	Qingkejiu;Sake	1e-05	yes	African_palm_wine;TW4	TW4;	0.99972	Mediterranean_oak;	1e-05	CHN-III;	1e-05	yes	TW4;
ERR1309358	African_beer	No	African_beer;	0.99985	CHN-III;CHN-VI/VII.1	1e-05	Qingkejiu;Sake	1e-05	yes	African_beer;	African_beer;	0.99972	Mediterranean_oak;	1e-05	CHN-III;	1e-05	yes	African_beer;
ERR1309389	Wine/European	No	Wine/European;Olive_brine	0.99985	CHN-III;CHN-VI/VII.1	1e-05	Qingkejiu;Sake	1e-05	yes	Wine/European;Olive_brine	Wine/European;	0.99972	Mediterranean_oak;	1e-05	CHN-III;	1e-05	yes	Wine/European;
ERR1309394	Wine/European	No	Wine/European;Olive_brine	0.99985	CHN-III;CHN-VI/VII.1	1e-05	Qingkejiu;Sake	1e-05	yes	Wine/European;Olive_brine	Wine/European;	0.99972	Mediterranean_oak;	1e-05	CHN-III;	1e-05	yes	Wine/European;
ERR1309395	Wine/European	No	Wine/European;Olive_brine	0.99985	CHN-III;CHN-VI/VII.1	1e-05	Qingkejiu;Sake	1e-05	yes	Wine/European;Olive_brine	Wine/European;	0.99972	Mediterranean_oak;	1e-05	CHN-III;	1e-05	yes	Wine/European;
ERR1309428	Wine/European	No	Wine/European;Olive_brine	0.99985	CHN-III;CHN-VI/VII.1	1e-05	Qingkejiu;Sake	1e-05	yes	Wine/European;Olive_brine	Wine/European;	0.99972	Mediterranean_oak;	1e-05	CHN-III;	1e-05	yes	Wine/European;
ERR1309488	Mediterranean_oak	No	Mediterranean_oak;	0.99985	CHN-III;CHN-VI/VII.1	1e-05	Qingkejiu;Sake	1e-05	yes	Mediterranean_oak;	Mediterranean_oak;	0.99972	CHN-III;	1e-05	CHN-VIII;	1e-05	yes	Mediterranean_oak;
ERR1309492	Asian_fermentation	No	Asian_fermentation;Baijiu	0.99985	CHN-III;CHN-VI/VII.1	1e-05	Qingkejiu;Sake	1e-05	yes	Asian_fermentation;Baijiu	Asian_fermentation;Baijiu	0.99972	Mediterranean_oak;	1e-05	CHN-III;	1e-05	yes	Asian_fermentation;Baijiu
ERR1309509	Sake	No	Qingkejiu;Sake	0.99985	CHN-III;CHN-VI/VII.1	1e-05	Asian_fermentation;Baijiu	1e-05	yes	Qingkejiu;Sake	Sake;	0.99972	Mediterranean_oak;	1e-05	CHN-III;	1e-05	yes	Sake;
ERR3010122	Olive_brine	No	Wine/European;Olive_brine	0.99985	CHN-III;CHN-VI/VII.1	1e-05	Qingkejiu;Sake	1e-05	yes	Wine/European;Olive_brine	Olive_brine;	0.99972	Mediterranean_oak;	1e-05	CHN-III;	1e-05	yes	Olive_brine;
ERR3010125	Olive_brine	No	Wine/European;Olive_brine	0.99985	CHN-III;CHN-VI/VII.1	1e-05	Qingkejiu;Sake	1e-05	yes	Wine/European;Olive_brine	Olive_brine;	0.99972	Mediterranean_oak;	1e-05	CHN-III;	1e-05	yes	Olive_brine;
ERR3010127	Olive_brine	No	Wine/European;Olive_brine	0.99985	CHN-III;CHN-VI/VII.1	1e-05	Qingkejiu;Sake	1e-05	yes	Wine/European;Olive_brine	Olive_brine;	0.99972	Mediterranean_oak;	1e-05	CHN-III;	1e-05	yes	Olive_brine;
FJ11	CHN-X	No	CHN-X;Malaysian	0.99985	CHN-III;CHN-VI/VII.1	1e-05	Qingkejiu;Sake	1e-05	yes	CHN-X;Malaysian	CHN-X;	0.99972	Mediterranean_oak;	1e-05	CHN-III;	1e-05	yes	CHN-X;
FJ3	CHN-V	No	TW2;CHN-V	0.99985	CHN-III;CHN-VI/VII.1	1e-05	Qingkejiu;Sake	1e-05	yes	TW2;CHN-V	CHN-V;	0.99972	Mediterranean_oak;	1e-05	CHN-III;	1e-05	yes	CHN-V;
FJ5	CHN-I	No	CHN-I;	0.99985	CHN-III;CHN-VI/VII.1	1e-05	Qingkejiu;Sake	1e-05	yes	CHN-I;	CHN-I;	0.99972	Mediterranean_oak;	1e-05	CHN-III;	1e-05	yes	CHN-I;
GZLJ3.19	Baijiu	No	Asian_fermentation;Baijiu	0.99985	CHN-III;CHN-VI/VII.1	1e-05	Qingkejiu;Sake	1e-05	yes	Asian_fermentation;Baijiu	Asian_fermentation;Baijiu	0.99972	Mediterranean_oak;	1e-05	CHN-III;	1e-05	yes	Asian_fermentation;Baijiu
GZLJ3.30	Baijiu	No	Asian_fermentation;Baijiu	0.99985	CHN-III;CHN-VI/VII.1	1e-05	Qingkejiu;Sake	1e-05	yes	Asian_fermentation;Baijiu	Asian_fermentation;Baijiu	0.99972	Mediterranean_oak;	1e-05	CHN-III;	1e-05	yes	Asian_fermentation;Baijiu
H344	TW1	Yes	TW1;CHN-IX	0.99985	CHN-III;CHN-VI/VII.1	1e-05	Qingkejiu;Sake	1e-05	yes	TW1;CHN-IX	TW1;	0.99972	Mediterranean_oak;	1e-05	CHN-III;	1e-05	yes	TW1;
H346	TW1	Yes	TW1;CHN-IX	0.99985	CHN-III;CHN-VI/VII.1	1e-05	Qingkejiu;Sake	1e-05	yes	TW1;CHN-IX	TW1;	0.99972	Mediterranean_oak;	1e-05	CHN-III;	1e-05	yes	TW1;
H347	TW1	Yes	TW1;CHN-IX	0.99985	CHN-III;CHN-VI/VII.1	1e-05	Qingkejiu;Sake	1e-05	yes	TW1;CHN-IX	TW1;	0.99972	Mediterranean_oak;	1e-05	CHN-III;	1e-05	yes	TW1;
H348	TW1	Yes	TW1;CHN-IX	0.99985	CHN-III;CHN-VI/VII.1	1e-05	Qingkejiu;Sake	1e-05	yes	TW1;CHN-IX	TW1;	0.99972	Mediterranean_oak;	1e-05	CHN-III;	1e-05	yes	TW1;
H411	TW1	Yes	TW1;CHN-IX	0.99985	CHN-III;CHN-VI/VII.1	1e-05	Qingkejiu;Sake	1e-05	yes	TW1;CHN-IX	TW1;	0.99972	Mediterranean_oak;	1e-05	CHN-III;	1e-05	yes	TW1;
H418	TW1	Yes	TW1;CHN-IX	0.99985	CHN-III;CHN-VI/VII.1	1e-05	Qingkejiu;Sake	1e-05	yes	TW1;CHN-IX	TW1;	0.99972	Mediterranean_oak;	1e-05	CHN-III;	1e-05	yes	TW1;
HLJ201	Baijiu	No	Asian_fermentation;Baijiu	0.99985	CHN-III;CHN-VI/VII.1	1e-05	Qingkejiu;Sake	1e-05	yes	Asian_fermentation;Baijiu	Asian_fermentation;Baijiu	0.99972	Mediterranean_oak;	1e-05	CHN-III;	1e-05	yes	Asian_fermentation;Baijiu
HLJ225	Baijiu	No	Asian_fermentation;Baijiu	0.99985	CHN-III;CHN-VI/VII.1	1e-05	Qingkejiu;Sake	1e-05	yes	Asian_fermentation;Baijiu	Asian_fermentation;Baijiu	0.99972	Mediterranean_oak;	1e-05	CHN-III;	1e-05	yes	Asian_fermentation;Baijiu
HLJ4	Baijiu	No	Asian_fermentation;Baijiu	0.99985	CHN-III;CHN-VI/VII.1	1e-05	Qingkejiu;Sake	1e-05	yes	Asian_fermentation;Baijiu	Asian_fermentation;Baijiu	0.99972	Mediterranean_oak;	1e-05	CHN-III;	1e-05	yes	Asian_fermentation;Baijiu
HLJ59	Baijiu	No	Asian_fermentation;Baijiu	0.99985	CHN-III;CHN-VI/VII.1	1e-05	Qingkejiu;Sake	1e-05	yes	Asian_fermentation;Baijiu	Asian_fermentation;Baijiu	0.99972	Mediterranean_oak;	1e-05	CHN-III;	1e-05	yes	Asian_fermentation;Baijiu
HN11	CHN-III	No	CHN-III;CHN-VI/VII.1	0.99985	Qingkejiu;Sake	1e-05	Asian_fermentation;Baijiu	1e-05	yes	CHN-III;CHN-VI/VII.1	CHN-III;	0.99972	Mediterranean_oak;	1e-05	CHN-VIII;	1e-05	yes	CHN-III;
HN17	CHN-V	No	TW2;CHN-V	0.99985	CHN-III;CHN-VI/VII.1	1e-05	Qingkejiu;Sake	1e-05	yes	TW2;CHN-V	CHN-V;	0.99972	Mediterranean_oak;	1e-05	CHN-III;	1e-05	yes	CHN-V;
HN18	CHN-V	No	TW2;CHN-V	0.99985	CHN-III;CHN-VI/VII.1	1e-05	Qingkejiu;Sake	1e-05	yes	TW2;CHN-V	CHN-V;	0.99972	Mediterranean_oak;	1e-05	CHN-III;	1e-05	yes	CHN-V;
HN19	CHN-III	No	CHN-III;CHN-VI/VII.1	0.99985	Qingkejiu;Sake	1e-05	Asian_fermentation;Baijiu	1e-05	yes	CHN-III;CHN-VI/VII.1	CHN-III;	0.99972	Mediterranean_oak;	1e-05	CHN-VIII;	1e-05	yes	CHN-III;
HN2	CHN-I	No	CHN-I;	0.99985	CHN-III;CHN-VI/VII.1	1e-05	Qingkejiu;Sake	1e-05	yes	CHN-I;	CHN-I;	0.99972	Mediterranean_oak;	1e-05	CHN-III;	1e-05	yes	CHN-I;
HN8	CHN-III	No	CHN-III;CHN-VI/VII.1	0.99985	Qingkejiu;Sake	1e-05	Asian_fermentation;Baijiu	1e-05	yes	CHN-III;CHN-VI/VII.1	CHN-III;	0.99972	Mediterranean_oak;	1e-05	CHN-VIII;	1e-05	yes	CHN-III;
HN9	CHN-III	No	CHN-III;CHN-VI/VII.1	0.99985	Qingkejiu;Sake	1e-05	Asian_fermentation;Baijiu	1e-05	yes	CHN-III;CHN-VI/VII.1	CHN-III;	0.99972	Mediterranean_oak;	1e-05	CHN-VIII;	1e-05	yes	CHN-III;
JM32.3	Huangjiu	No	Asian_fermentation;Baijiu	0.99985	CHN-III;CHN-VI/VII.1	1e-05	Qingkejiu;Sake	1e-05	yes	Asian_fermentation;Baijiu	Asian_fermentation;Baijiu	0.99972	Mediterranean_oak;	1e-05	CHN-III;	1e-05	yes	Asian_fermentation;Baijiu
JXXY1.1	CHN-X	No	CHN-X;Malaysian	0.99985	CHN-III;CHN-VI/VII.1	1e-05	Qingkejiu;Sake	1e-05	yes	CHN-X;Malaysian	CHN-X;	0.99972	Mediterranean_oak;	1e-05	CHN-III;	1e-05	yes	CHN-X;
PD33A	TW2	Yes	TW2;CHN-V	0.99985	CHN-III;CHN-VI/VII.1	1e-05	Qingkejiu;Sake	1e-05	yes	TW2;CHN-V	TW2a	0.99972	Mediterranean_oak;	1e-05	CHN-III;	1e-05	yes	TW2a
PD34A	TW2	Yes	TW2;CHN-V	0.99985	CHN-III;CHN-VI/VII.1	1e-05	Qingkejiu;Sake	1e-05	yes	TW2;CHN-V	TW2a	0.99972	Mediterranean_oak;	1e-05	CHN-III;	1e-05	yes	TW2a
RG10	Asian_fermentation	Yes	Asian_fermentation;Baijiu	0.99985	CHN-III;CHN-VI/VII.1	1e-05	Qingkejiu;Sake	1e-05	yes	Asian_fermentation;Baijiu	Asian_fermentation;Baijiu	0.99972	Mediterranean_oak;	1e-05	CHN-III;	1e-05	yes	Asian_fermentation;Baijiu
S10	CHN-VI/VII.1	Yes	CHN-III;CHN-VI/VII.1	0.99985	Qingkejiu;Sake	1e-05	Asian_fermentation;Baijiu	1e-05	yes	CHN-III;CHN-VI/VII.1	CHN-VI/VII.1;	0.99972	Mediterranean_oak;	1e-05	CHN-III;	1e-05	yes	CHN-VI/VII.1;
S11	CHN-VI/VII.1	Yes	CHN-III;CHN-VI/VII.1	0.99985	Qingkejiu;Sake	1e-05	Asian_fermentation;Baijiu	1e-05	yes	CHN-III;CHN-VI/VII.1	CHN-VI/VII.1;	0.99972	Mediterranean_oak;	1e-05	CHN-III;	1e-05	yes	CHN-VI/VII.1;
S12	CHN-VI/VII.1	Yes	CHN-III;CHN-VI/VII.1	0.99985	Qingkejiu;Sake	1e-05	Asian_fermentation;Baijiu	1e-05	yes	CHN-III;CHN-VI/VII.1	CHN-VI/VII.1;	0.99972	Mediterranean_oak;	1e-05	CHN-III;	1e-05	yes	CHN-VI/VII.1;
SPA0342	TW1	Yes	TW1;CHN-IX	0.99985	CHN-III;CHN-VI/VII.1	1e-05	Qingkejiu;Sake	1e-05	yes	TW1;CHN-IX	TW1;	0.99972	Mediterranean_oak;	1e-05	CHN-III;	1e-05	yes	TW1;
SPA0348	TW1	Yes	TW1;CHN-IX	0.99985	CHN-III;CHN-VI/VII.1	1e-05	Qingkejiu;Sake	1e-05	yes	TW1;CHN-IX	TW1;	0.99972	Mediterranean_oak;	1e-05	CHN-III;	1e-05	yes	TW1;
SPA0354	TW1	Yes	TW1;CHN-IX	0.99985	CHN-III;CHN-VI/VII.1	1e-05	Qingkejiu;Sake	1e-05	yes	TW1;CHN-IX	TW1;	0.99972	Mediterranean_oak;	1e-05	CHN-III;	1e-05	yes	TW1;
SPA0356	TW1	Yes	TW1;CHN-IX	0.99985	CHN-III;CHN-VI/VII.1	1e-05	Qingkejiu;Sake	1e-05	yes	TW1;CHN-IX	TW1;	0.99972	Mediterranean_oak;	1e-05	CHN-III;	1e-05	yes	TW1;
SPA0366	TW1	Yes	TW1;CHN-IX	0.99985	CHN-III;CHN-VI/VII.1	1e-05	Qingkejiu;Sake	1e-05	yes	TW1;CHN-IX	TW1;	0.99972	Mediterranean_oak;	1e-05	CHN-III;	1e-05	yes	TW1;
SR09	TW2	Yes	TW2;CHN-V	0.99985	CHN-III;CHN-VI/VII.1	1e-05	Qingkejiu;Sake	1e-05	yes	TW2;CHN-V	TW2a	0.99972	Mediterranean_oak;	1e-05	CHN-III;	1e-05	yes	TW2a
SR10	TW2	Yes	TW2;CHN-V	0.99985	CHN-III;CHN-VI/VII.1	1e-05	Qingkejiu;Sake	1e-05	yes	TW2;CHN-V	TW2a	0.99972	Mediterranean_oak;	1e-05	CHN-III;	1e-05	yes	TW2a
SR18	TW2	Yes	TW2;CHN-V	0.99985	CHN-III;CHN-VI/VII.1	1e-05	Qingkejiu;Sake	1e-05	yes	TW2;CHN-V	TW2a	0.99972	Mediterranean_oak;	1e-05	CHN-III;	1e-05	yes	TW2a
SR19	TW2	Yes	TW2;CHN-V	0.99985	CHN-III;CHN-VI/VII.1	1e-05	Qingkejiu;Sake	1e-05	yes	TW2;CHN-V	TW2a	0.99972	Mediterranean_oak;	1e-05	CHN-III;	1e-05	yes	TW2a
SX4	CHN-II	No	CHN-II;	0.99985	CHN-III;CHN-VI/VII.1	1e-05	Qingkejiu;Sake	1e-05	yes	CHN-II;	CHN-II;	0.99972	Mediterranean_oak;	1e-05	CHN-III;	1e-05	yes	CHN-II;
SX7	CHN-II	No	CHN-II;	0.99985	CHN-III;CHN-VI/VII.1	1e-05	Qingkejiu;Sake	1e-05	yes	CHN-II;	CHN-II;	0.99972	Mediterranean_oak;	1e-05	CHN-III;	1e-05	yes	CHN-II;
XI02	CHN-VI/VII.1	Yes	CHN-III;CHN-VI/VII.1	0.99985	Qingkejiu;Sake	1e-05	Asian_fermentation;Baijiu	1e-05	yes	CHN-III;CHN-VI/VII.1	CHN-VI/VII.1;	0.99972	Mediterranean_oak;	1e-05	CHN-III;	1e-05	yes	CHN-VI/VII.1;
XI04	TW1	Yes	TW1;CHN-IX	0.99985	CHN-III;CHN-VI/VII.1	1e-05	Qingkejiu;Sake	1e-05	yes	TW1;CHN-IX	TW1;	0.99972	Mediterranean_oak;	1e-05	CHN-III;	1e-05	yes	TW1;
XZ10.1	Qingkejiu	No	Qingkejiu;Sake	0.99985	CHN-III;CHN-VI/VII.1	1e-05	Asian_fermentation;Baijiu	1e-05	yes	Qingkejiu;Sake	Qingkejiu;	0.99972	Mediterranean_oak;	1e-05	CHN-III;	1e-05	yes	Qingkejiu;
XZ3.1	Qingkejiu	No	Qingkejiu;Sake	0.99985	CHN-III;CHN-VI/VII.1	1e-05	Asian_fermentation;Baijiu	1e-05	yes	Qingkejiu;Sake	Qingkejiu;	0.99972	Mediterranean_oak;	1e-05	CHN-III;	1e-05	yes	Qingkejiu;
XZ4.1	Qingkejiu	No	Qingkejiu;Sake	0.99985	CHN-III;CHN-VI/VII.1	1e-05	Asian_fermentation;Baijiu	1e-05	yes	Qingkejiu;Sake	Qingkejiu;	0.99972	Mediterranean_oak;	1e-05	CHN-III;	1e-05	yes	Qingkejiu;
XZ4.2	Qingkejiu	No	Qingkejiu;Sake	0.99985	CHN-III;CHN-VI/VII.1	1e-05	Asian_fermentation;Baijiu	1e-05	yes	Qingkejiu;Sake	Qingkejiu;	0.99972	Mediterranean_oak;	1e-05	CHN-III;	1e-05	yes	Qingkejiu;
XZ7	Qingkejiu	No	Qingkejiu;Sake	0.99985	CHN-III;CHN-VI/VII.1	1e-05	Asian_fermentation;Baijiu	1e-05	yes	Qingkejiu;Sake	Qingkejiu;	0.99972	Mediterranean_oak;	1e-05	CHN-III;	1e-05	yes	Qingkejiu;
ZJ2	CHN-V	No	TW2;CHN-V	0.99985	CHN-III;CHN-VI/VII.1	1e-05	Qingkejiu;Sake	1e-05	yes	TW2;CHN-V	CHN-V;	0.99972	Mediterranean_oak;	1e-05	CHN-III;	1e-05	yes	CHN-V;
BJ14	CHN-IV	No	CHN-IV;	0.999849	CHN-III;CHN-VI/VII.1	1e-05	Qingkejiu;Sake	1e-05	yes	CHN-IV;	CHN-IV;	0.99972	Mediterranean_oak;	1e-05	CHN-III;	1e-05	yes	CHN-IV;
BJ18	CHN-IV	No	CHN-IV;	0.999849	CHN-III;CHN-VI/VII.1	1.1e-05	Qingkejiu;Sake	1e-05	yes	CHN-IV;	CHN-IV;	0.99972	Mediterranean_oak;	1e-05	CHN-III;	1e-05	yes	CHN-IV;
BJ19	CHN-IV	No	CHN-IV;	0.999849	TW5;	1.1e-05	CHN-III;CHN-VI/VII.1	1e-05	yes	CHN-IV;	CHN-IV;	0.99972	Mediterranean_oak;	1e-05	CHN-III;	1e-05	yes	CHN-IV;
ERR1111499	Brazilian	No	Brazilian;	0.999849	CHN-III;CHN-VI/VII.1	1.1e-05	Qingkejiu;Sake	1e-05	yes	Brazilian;	Brazilian;	0.99972	Mediterranean_oak;	1e-05	CHN-III;	1e-05	yes	Brazilian;
FJSA40.2	CHN-X	No	CHN-X;Malaysian	0.999848	TW5;	1.2e-05	CHN-III;CHN-VI/VII.1	1e-05	yes	CHN-X;Malaysian	CHN-X;	0.99972	Mediterranean_oak;	1e-05	CHN-III;	1e-05	yes	CHN-X;
SR15	TW2	Yes	TW2;CHN-V	0.999848	TW1;CHN-IX	1.2e-05	CHN-III;CHN-VI/VII.1	1e-05	yes	TW2;CHN-V	TW2b	0.99972	Mediterranean_oak;	1e-05	CHN-III;	1e-05	yes	TW2b
ERR1308906	Asian_fermentation	No	Asian_fermentation;Baijiu	0.999847	North_American_oak;	1.3e-05	CHN-III;CHN-VI/VII.1	1e-05	yes	Asian_fermentation;Baijiu	Asian_fermentation;Baijiu	0.99972	Mediterranean_oak;	1e-05	CHN-III;	1e-05	yes	Asian_fermentation;Baijiu
ERR1308746	TW1	Yes	TW1;CHN-IX	0.999846	CHN-I;	1.4e-05	CHN-III;CHN-VI/VII.1	1e-05	yes	TW1;CHN-IX	TW1;	0.99972	Mediterranean_oak;	1e-05	CHN-III;	1e-05	yes	TW1;
PD09A	TW5	Yes	TW5;	0.999846	African_palm_wine;TW4	1.4e-05	CHN-III;CHN-VI/VII.1	1e-05	yes	TW5;	TW5;	0.99972	Mediterranean_oak;	1e-05	CHN-III;	1e-05	yes	TW5;
ERR1308911	Asian_fermentation	Yes	Asian_fermentation;Baijiu	0.999844	TW2;CHN-V	1.6e-05	CHN-III;CHN-VI/VII.1	1e-05	yes	Asian_fermentation;Baijiu	Asian_fermentation;Baijiu	0.99972	Mediterranean_oak;	1e-05	CHN-III;	1e-05	yes	Asian_fermentation;Baijiu
SR16	TW2	Yes	TW2;CHN-V	0.999843	Mediterranean_oak;	1.6e-05	TW1;CHN-IX	1.2e-05	yes	TW2;CHN-V	TW2b	0.99972	Mediterranean_oak;	1e-05	CHN-III;	1e-05	yes	TW2b
ERR1309036	African_palm_wine	No	African_palm_wine;TW4	0.999842	TW2;CHN-V	1.5e-05	Brazilian;	1.3e-05	yes	African_palm_wine;TW4	African_palm_wine;	0.99972	Mediterranean_oak;	1e-05	CHN-III;	1e-05	yes	African_palm_wine;
ERR1309447	African_palm_wine	No	African_palm_wine;TW4	0.999842	CHN-X;Malaysian	1.8e-05	CHN-III;CHN-VI/VII.1	1e-05	yes	African_palm_wine;TW4	African_palm_wine;	0.99972	Mediterranean_oak;	1e-05	CHN-III;	1e-05	yes	African_palm_wine;
H414	TW1	Yes	TW1;CHN-IX	0.999842	North_American_oak;	1.8e-05	CHN-III;CHN-VI/VII.1	1e-05	yes	TW1;CHN-IX	TW1;	0.99972	Mediterranean_oak;	1e-05	CHN-III;	1e-05	yes	TW1;
S6	TW2	Yes	TW2;CHN-V	0.999842	Mediterranean_oak;	1.8e-05	CHN-III;CHN-VI/VII.1	1e-05	yes	TW2;CHN-V	TW2b	0.99972	Mediterranean_oak;	1e-05	CHN-III;	1e-05	yes	TW2b
XXY26L.1	CHN-IX	No	TW1;CHN-IX	0.999842	Brazilian;	1.8e-05	African_palm_wine;TW4	1.1e-05	yes	TW1;CHN-IX	CHN-IX;	0.99972	Mediterranean_oak;	1e-05	CHN-III;	1e-05	yes	CHN-IX;
ERR1309167	Asian_fermentation	No	Asian_fermentation;Baijiu	0.999841	Wine/European;Olive_brine	1.6e-05	Mediterranean_oak;	1.2e-05	yes	Asian_fermentation;Baijiu	Asian_fermentation;Baijiu	0.99972	Mediterranean_oak;	1e-05	CHN-III;	1e-05	yes	Asian_fermentation;Baijiu
ERR1309484	African_palm_wine	No	African_palm_wine;TW4	0.999841	CHN-II;	1.6e-05	CHN-X;Malaysian	1.3e-05	yes	African_palm_wine;TW4	African_palm_wine;	0.99972	Mediterranean_oak;	1e-05	CHN-III;	1e-05	yes	African_palm_wine;
S17	TW2	Yes	TW2;CHN-V	0.999841	Mediterranean_oak;	1.9e-05	CHN-III;CHN-VI/VII.1	1e-05	yes	TW2;CHN-V	TW2b	0.99972	Mediterranean_oak;	1e-05	CHN-III;	1e-05	yes	TW2b
SR17	TW2	Yes	TW2;CHN-V	0.999841	Mediterranean_oak;	1.9e-05	TW1;CHN-IX	1.1e-05	yes	TW2;CHN-V	TW2b	0.99972	Mediterranean_oak;	1e-05	CHN-III;	1e-05	yes	TW2b
SR22	TW2	Yes	TW2;CHN-V	0.999841	Mediterranean_oak;	1.7e-05	African_beer;	1.2e-05	yes	TW2;CHN-V	TW2b	0.99972	Mediterranean_oak;	1e-05	CHN-III;	1e-05	yes	TW2b
ERR1308750	Asian_fermentation	No	Asian_fermentation;Baijiu	0.99984	Mediterranean_oak;	1.9e-05	Wine/European;Olive_brine	1.1e-05	yes	Asian_fermentation;Baijiu	Asian_fermentation;Baijiu	0.99972	Mediterranean_oak;	1e-05	CHN-III;	1e-05	yes	Asian_fermentation;Baijiu
LY0197	TW4	Yes	African_palm_wine;TW4	0.99984	North_American_oak;	1.5e-05	TW2;CHN-V	1.5e-05	yes	African_palm_wine;TW4	TW4;	0.99972	Mediterranean_oak;	1e-05	CHN-III;	1e-05	yes	TW4;
S5	TW2	Yes	TW2;CHN-V	0.999839	Mediterranean_oak;	1.8e-05	Wine/European;Olive_brine	1.3e-05	yes	TW2;CHN-V	TW2b	0.99972	Mediterranean_oak;	1e-05	CHN-III;	1e-05	yes	TW2b
SR20	TW2	Yes	TW2;CHN-V	0.999839	TW1;CHN-IX	1.9e-05	Wine/European;Olive_brine	1.2e-05	yes	TW2;CHN-V	TW2b	0.99972	Mediterranean_oak;	1e-05	CHN-III;	1e-05	yes	TW2b
RG11	TW2	Yes	TW2;CHN-V	0.999837	TW1;CHN-IX	1.7e-05	Mediterranean_oak;	1.4e-05	yes	TW2;CHN-V	TW2b	0.99972	Mediterranean_oak;	1e-05	CHN-III;	1e-05	yes	TW2b
ERR1308760	Asian_fermentation	No	Asian_fermentation;Baijiu	0.999836	African_beer;	1.7e-05	North_American_oak;	1.7e-05	yes	Asian_fermentation;Baijiu	Asian_fermentation;Baijiu	0.99972	Mediterranean_oak;	1e-05	CHN-III;	1e-05	yes	Asian_fermentation;Baijiu
SR11	TW2	Yes	TW2;CHN-V	0.999836	TW1;CHN-IX	1.8e-05	Mediterranean_oak;	1.6e-05	yes	TW2;CHN-V	TW2b	0.99972	Mediterranean_oak;	1e-05	CHN-III;	1e-05	yes	TW2b
ERR1309044	Wine/European	No	Wine/European;Olive_brine	0.999835	CHN-III;CHN-VI/VII.1	1.7e-05	TW1;CHN-IX	1.4e-05	yes	Wine/European;Olive_brine	Wine/European;	0.99972	Mediterranean_oak;	1e-05	CHN-III;	1e-05	yes	Wine/European;
ERR3010128	Olive_brine	No	Wine/European;Olive_brine	0.999835	African_palm_wine;TW4	1.6e-05	Qingkejiu;Sake	1.5e-05	yes	Wine/European;Olive_brine	Olive_brine;	0.99972	Mediterranean_oak;	1e-05	CHN-III;	1e-05	yes	Olive_brine;
HN4	CHN-I	No	CHN-I;	0.999835	Brazilian;	1.8e-05	African_palm_wine;TW4	1.4e-05	yes	CHN-I;	CHN-I;	0.99972	Mediterranean_oak;	1e-05	CHN-III;	1e-05	yes	CHN-I;
BQ8.2	Huangjiu	No	Asian_fermentation;Baijiu	0.999833	Wine/European;Olive_brine	1.8e-05	CHN-X;Malaysian	1.5e-05	yes	Asian_fermentation;Baijiu	Asian_fermentation;Baijiu	0.99972	Mediterranean_oak;	1e-05	CHN-III;	1e-05	yes	Asian_fermentation;Baijiu
RG01	Asian_fermentation	Yes	Asian_fermentation;Baijiu	0.999832	TW1;CHN-IX	1.9e-05	TW2;CHN-V	1.9e-05	yes	Asian_fermentation;Baijiu	Asian_fermentation;Baijiu	0.99972	Mediterranean_oak;	1e-05	CHN-III;	1e-05	yes	Asian_fermentation;Baijiu
S1	TW2	Yes	TW2;CHN-V	0.999832	TW1;CHN-IX	2e-05	Mediterranean_oak;	1.8e-05	yes	TW2;CHN-V	TW2b	0.99972	Mediterranean_oak;	1e-05	CHN-III;	1e-05	yes	TW2b
S2	TW2	Yes	TW2;CHN-V	0.999832	TW1;CHN-IX	2e-05	Mediterranean_oak;	1.8e-05	yes	TW2;CHN-V	TW2b	0.99972	Mediterranean_oak;	1e-05	CHN-III;	1e-05	yes	TW2b
XXYS14.1	CHN-IX	No	TW1;CHN-IX	0.999831	Wine/European;Olive_brine	1.8e-05	TW2;CHN-V	1.5e-05	yes	TW1;CHN-IX	CHN-IX;	0.99972	Mediterranean_oak;	1e-05	CHN-III;	1e-05	yes	CHN-IX;
ERR1111497	Brazilian	No	Brazilian;	0.99983	African_palm_wine;TW4	1.6e-05	Asian_fermentation;Baijiu	1.5e-05	yes	Brazilian;	Brazilian;	0.99972	Mediterranean_oak;	1e-05	CHN-III;	1e-05	yes	Brazilian;
HN3.8	Huangjiu	No	Asian_fermentation;Baijiu	0.999829	CHN-III;CHN-VI/VII.1	1.8e-05	CHN-X;Malaysian	1.7e-05	yes	Asian_fermentation;Baijiu	Asian_fermentation;Baijiu	0.99972	Mediterranean_oak;	1e-05	CHN-III;	1e-05	yes	Asian_fermentation;Baijiu
ERR1308960	African_beer	No	African_beer;	0.999827	CHN-X;Malaysian	2e-05	TW2;CHN-V	1.7e-05	yes	African_beer;	African_beer;	0.99972	Mediterranean_oak;	1e-05	CHN-III;	1e-05	yes	African_beer;
S18	TW2	Yes	TW2;CHN-V	0.999824	CHN-II;	1.8e-05	TW1;CHN-IX	1.7e-05	yes	TW2;CHN-V	TW2b	0.99972	Mediterranean_oak;	1e-05	CHN-III;	1e-05	yes	TW2b
ERR1309191	African_beer	No	African_beer;	0.999821	TW5;	1.9e-05	Brazilian;	1.9e-05	yes	African_beer;	African_beer;	0.99972	Mediterranean_oak;	1e-05	CHN-III;	1e-05	yes	African_beer;
XXYS1.4	CHN-IX	No	TW1;CHN-IX	0.999792	CHN-II;	2e-05	CHN-X;Malaysian	1.9e-05	yes	TW1;CHN-IX	CHN-IX;	0.99972	Mediterranean_oak;	1e-05	CHN-III;	1e-05	yes	CHN-IX;
HN16	CHN-V	No	TW2;CHN-V	0.989314	North_American_oak;	0.010546	CHN-III;CHN-VI/VII.1	1e-05	yes	TW2;CHN-V	CHN-V;	0.99972	Mediterranean_oak;	1e-05	CHN-III;	1e-05	yes	CHN-V;
YN1	CHN-VI/VII.2	No	CHN-VI/VII.2;	0.988436	TW5;	0.008865	Asian_fermentation;Baijiu	0.002556	yes	CHN-VI/VII.2;	TW3;CHN-VI/VII.2	0.99972	Mediterranean_oak;	1e-05	CHN-III;	1e-05	yes	TW3;CHN-VI/VII.2
FJ12	CHN-VI/VII.2	No	CHN-VI/VII.2;	0.975808	TW5;	0.024052	CHN-III;CHN-VI/VII.1	1e-05	yes	CHN-VI/VII.2;	TW3;CHN-VI/VII.2	0.99972	Mediterranean_oak;	1e-05	CHN-III;	1e-05	yes	TW3;CHN-VI/VII.2
FJ2	CHN-V	No	TW2;CHN-V	0.974259	North_American_oak;	0.025601	CHN-III;CHN-VI/VII.1	1e-05	no	NA	CHN-V;	0.99972	Mediterranean_oak;	1e-05	CHN-III;	1e-05	yes	CHN-V;
FJ6	CHN-V	No	TW2;CHN-V	0.970018	North_American_oak;	0.029842	CHN-III;CHN-VI/VII.1	1e-05	no	NA	CHN-V;	0.99972	Mediterranean_oak;	1e-05	CHN-III;	1e-05	yes	CHN-V;
ZJ1	CHN-V	No	TW2;CHN-V	0.961274	North_American_oak;	0.03693	TW5;	0.001666	no	NA	CHN-V;	0.99972	Mediterranean_oak;	1e-05	CHN-III;	1e-05	yes	CHN-V;
PD36A	TW4	Yes	African_palm_wine;TW4	0.95599	TW5;	0.04387	CHN-III;CHN-VI/VII.1	1e-05	no	NA	TW4;	0.99972	Mediterranean_oak;	1e-05	CHN-III;	1e-05	yes	TW4;
H416	TW4	Yes	African_palm_wine;TW4	0.936987	TW5;	0.062873	CHN-III;CHN-VI/VII.1	1e-05	no	NA	TW4;	0.99972	Mediterranean_oak;	1e-05	CHN-III;	1e-05	yes	TW4;
ERR1309349	CHN-V	No	TW2;CHN-V	0.928384	North_American_oak;	0.062288	TW5;	0.009199	no	NA	CHN-V;	0.99972	Mediterranean_oak;	1e-05	CHN-III;	1e-05	yes	CHN-V;
HLJ3	CHN-VI/VII.2	No	CHN-VI/VII.2;	0.915467	CHN-IV;	0.084393	CHN-III;CHN-VI/VII.1	1e-05	no	NA	CHN-IV;CHN-VI/VII.2	0.99972	Mediterranean_oak;	1e-05	CHN-III;	1e-05	yes	CHN-IV;CHN-VI/VII.2
HLJ2	CHN-VI/VII.2	No	CHN-VI/VII.2;	0.915382	CHN-IV;	0.084478	CHN-III;CHN-VI/VII.1	1e-05	no	NA	CHN-IV;CHN-VI/VII.2	0.99972	Mediterranean_oak;	1e-05	CHN-III;	1e-05	yes	CHN-IV;CHN-VI/VII.2
S7	CHN-VI/VII.1	Yes	CHN-III;CHN-VI/VII.1	0.880968	TW5;	0.118892	Qingkejiu;Sake	1e-05	no	NA	CHN-VI/VII.1;	0.99972	Mediterranean_oak;	1e-05	CHN-III;	1e-05	yes	CHN-VI/VII.1;
JL4	CHN-VI/VII.2	No	CHN-VI/VII.2;	0.780599	CHN-IV;	0.219261	CHN-III;CHN-VI/VII.1	1e-05	no	NA	CHN-IV;CHN-VI/VII.2	0.99972	Mediterranean_oak;	1e-05	CHN-III;	1e-05	yes	CHN-IV;CHN-VI/VII.2
SD3	CHN-VI/VII.2	No	CHN-VI/VII.2;	0.675702	CHN-III;CHN-VI/VII.1	0.277434	TW5;	0.030205	no	NA	TW3;CHN-VI/VII.2	0.99972	Mediterranean_oak;	1e-05	CHN-III;	1e-05	yes	TW3;CHN-VI/VII.2
BT2.8	Mantou1	No	African_beer;	0.565104	Qingkejiu;Sake	0.434756	CHN-III;CHN-VI/VII.1	1e-05	no	NA	Mantou1;	0.99972	Mediterranean_oak;	1e-05	CHN-III;	1e-05	yes	Mantou1;
BT1.1	Mantou1	No	African_beer;	0.565024	Qingkejiu;Sake	0.434829	Wine/European;Olive_brine	1.7e-05	no	NA	Mantou1;	0.99972	Mediterranean_oak;	1e-05	CHN-III;	1e-05	yes	Mantou1;
BT4	Mantou1	No	African_beer;	0.564948	Qingkejiu;Sake	0.434907	Wine/European;Olive_brine	1.6e-05	no	NA	Mantou1;	0.99972	Mediterranean_oak;	1e-05	CHN-III;	1e-05	yes	Mantou1;
BT2.6	Mantou1	No	African_beer;	0.555303	Qingkejiu;Sake	0.444553	Wine/European;Olive_brine	1.4e-05	no	NA	Mantou1;	0.99972	Mediterranean_oak;	1e-05	CHN-III;	1e-05	yes	Mantou1;
BT3	Mantou1	No	African_beer;	0.543886	Qingkejiu;Sake	0.420553	Wine/European;Olive_brine	0.035418	no	NA	Mantou1;	0.99972	Mediterranean_oak;	1e-05	CHN-III;	1e-05	yes	Mantou1;
BJ11	CHN-VIII	No	CHN-VI/VII.2;	0.526623	Wine/European;Olive_brine	0.473237	CHN-III;CHN-VI/VII.1	1e-05	no	CHN-VIII	CHN-VIII;	0.99972	Mediterranean_oak;	1e-05	CHN-III;	1e-05	yes	CHN-VIII;
BJ13	CHN-VIII	No	CHN-VI/VII.2;	0.52589	Wine/European;Olive_brine	0.47397	CHN-III;CHN-VI/VII.1	1e-05	no	CHN-VIII	CHN-VIII;	0.99972	Mediterranean_oak;	1e-05	CHN-III;	1e-05	yes	CHN-VIII;
BJ10	CHN-VIII	No	CHN-VI/VII.2;	0.525742	Wine/European;Olive_brine	0.474118	CHN-III;CHN-VI/VII.1	1e-05	no	CHN-VIII	CHN-VIII;	0.99972	Mediterranean_oak;	1e-05	CHN-III;	1e-05	yes	CHN-VIII;
BJ5	CHN-VIII	No	CHN-VI/VII.2;	0.523146	Wine/European;Olive_brine	0.437112	Brazilian;	0.039612	no	CHN-VIII	CHN-VIII;	0.99972	Mediterranean_oak;	1e-05	CHN-III;	1e-05	yes	CHN-VIII;
SR23	CHN-VIII	Yes	CHN-VI/VII.2;	0.510261	Wine/European;Olive_brine	0.489599	CHN-III;CHN-VI/VII.1	1e-05	no	CHN-VIII	CHN-VIII;	0.99972	Mediterranean_oak;	1e-05	CHN-III;	1e-05	yes	CHN-VIII;
S15	CHN-VIII	Yes	CHN-VI/VII.2;	0.5101	Wine/European;Olive_brine	0.48976	CHN-III;CHN-VI/VII.1	1e-05	no	CHN-VIII	CHN-VIII;	0.99972	Mediterranean_oak;	1e-05	CHN-III;	1e-05	yes	CHN-VIII;
S14	CHN-VIII	Yes	CHN-VI/VII.2;	0.510089	Wine/European;Olive_brine	0.489771	CHN-III;CHN-VI/VII.1	1e-05	no	CHN-VIII	CHN-VIII;	0.99972	Mediterranean_oak;	1e-05	CHN-III;	1e-05	yes	CHN-VIII;
SR26	TW3	Yes	CHN-VI/VII.2;	0.50944	CHN-X;Malaysian	0.477417	TW5;	0.013013	no	TW3	TW3;CHN-VI/VII.2	0.99972	Mediterranean_oak;	1e-05	CHN-III;	1e-05	yes	TW3;CHN-VI/VII.2
RG08	TW3	Yes	CHN-VI/VII.2;	0.508147	CHN-X;Malaysian	0.4803	TW5;	0.011423	yes	TW3	TW3;CHN-VI/VII.2	0.99972	Mediterranean_oak;	1e-05	CHN-III;	1e-05	yes	TW3;CHN-VI/VII.2
RG06	TW3	Yes	CHN-VI/VII.2;	0.507185	CHN-X;Malaysian	0.481624	TW5;	0.011062	yes	TW3	TW3;CHN-VI/VII.2	0.99972	Mediterranean_oak;	1e-05	CHN-III;	1e-05	yes	TW3;CHN-VI/VII.2
SD1	CHN-VI/VII.1	No	CHN-III;CHN-VI/VII.1	0.488546	North_American_oak;	0.451204	TW5;	0.060117	no	NA	CHN-VI/VII.1;	0.99972	Mediterranean_oak;	1e-05	CHN-III;	1e-05	yes	CHN-VI/VII.1;
SD2	CHN-VI/VII.1	No	CHN-III;CHN-VI/VII.1	0.485457	North_American_oak;	0.440978	TW5;	0.073435	no	NA	CHN-VI/VII.1;	0.99972	Mediterranean_oak;	1e-05	CHN-III;	1e-05	yes	CHN-VI/VII.1;
SX10	CHN-VI/VII.1	No	CHN-III;CHN-VI/VII.1	0.479401	North_American_oak;	0.453483	TW5;	0.066986	no	NA	CHN-VI/VII.1;	0.99972	Mediterranean_oak;	1e-05	CHN-III;	1e-05	yes	CHN-VI/VII.1;
ERR1308915	North_American_oak	No	CHN-VI/VII.2;	0.99985	CHN-III;CHN-VI/VII.1	1e-05	Qingkejiu;Sake	1e-05	yes	CHN-VI/VII.2;	North_American_oak;	0.999719	CHN-VIII;	1.1e-05	Mediterranean_oak;	1e-05	yes	North_American_oak;
ERR1309003	Wine/European	No	Wine/European;Olive_brine	0.99985	CHN-III;CHN-VI/VII.1	1e-05	Qingkejiu;Sake	1e-05	yes	Wine/European;Olive_brine	Wine/European;	0.999719	Mediterranean_oak;	1.1e-05	CHN-III;	1e-05	yes	Wine/European;
H359	TW1	Yes	TW1;CHN-IX	0.99985	CHN-III;CHN-VI/VII.1	1e-05	Qingkejiu;Sake	1e-05	yes	TW1;CHN-IX	TW1;	0.999719	CHN-IX;	1.1e-05	Mediterranean_oak;	1e-05	yes	TW1;
ERR3010126	Olive_brine	No	Wine/European;Olive_brine	0.999841	African_palm_wine;TW4	1.4e-05	Brazilian;	1.3e-05	yes	Wine/European;Olive_brine	Olive_brine;	0.999719	African_beer;	1.1e-05	Mediterranean_oak;	1e-05	yes	Olive_brine;
GT39.1	CHN-X	No	CHN-X;Malaysian	0.999839	TW2;CHN-V	1.9e-05	CHN-III;CHN-VI/VII.1	1.1e-05	yes	CHN-X;Malaysian	CHN-X;	0.999719	African_beer;	1.1e-05	Mediterranean_oak;	1e-05	yes	CHN-X;
S3	TW2	Yes	TW2;CHN-V	0.999837	TW1;CHN-IX	1.8e-05	Mediterranean_oak;	1.4e-05	yes	TW2;CHN-V	TW2b	0.999719	Mediterranean_oak;	1.1e-05	CHN-III;	1e-05	yes	TW2b
H413	TW1	Yes	TW1;CHN-IX	0.999833	CHN-II;	1.7e-05	Qingkejiu;Sake	1.4e-05	yes	TW1;CHN-IX	TW1;	0.999719	CHN-IX;	1.1e-05	Mediterranean_oak;	1e-05	yes	TW1;
SR27	TW3	Yes	CHN-X;Malaysian	0.507677	North_American_oak;	0.459688	TW5;	0.032505	yes	TW3	TW3;CHN-VI/VII.2	0.999719	CHN-VIII;	1.1e-05	Mediterranean_oak;	1e-05	yes	TW3;CHN-VI/VII.2
ERR1309458	North_American_oak	No	CHN-VI/VII.2;	0.99985	CHN-III;CHN-VI/VII.1	1e-05	Qingkejiu;Sake	1e-05	yes	CHN-VI/VII.2;	North_American_oak;	0.999718	CHN-VIII;	1.1e-05	CHN-VI/VII.1;	1.1e-05	yes	North_American_oak;
HN5	CHN-I	No	CHN-I;	0.999846	TW5;	1.3e-05	CHN-III;CHN-VI/VII.1	1e-05	yes	CHN-I;	CHN-I;	0.999718	CHN-IV;CHN-VI/VII.2	1.2e-05	Mediterranean_oak;	1e-05	yes	CHN-I;
LY0200	TW4	Yes	African_palm_wine;TW4	0.999841	North_American_oak;	1.6e-05	Brazilian;	1.3e-05	yes	African_palm_wine;TW4	TW4;	0.999718	CHN-IV;CHN-VI/VII.2	1.2e-05	Mediterranean_oak;	1e-05	yes	TW4;
ERR1308587	TW4	Yes	African_palm_wine;TW4	0.973198	TW5;	0.026662	CHN-III;CHN-VI/VII.1	1e-05	no	NA	TW4;	0.999718	CHN-VI/VII.1;	1.2e-05	Mediterranean_oak;	1e-05	yes	TW4;
ERR1111488	Brazilian	No	Brazilian;	0.99985	CHN-III;CHN-VI/VII.1	1e-05	Qingkejiu;Sake	1e-05	yes	Brazilian;	Brazilian;	0.999717	TW3;	1.3e-05	Mediterranean_oak;	1e-05	yes	Brazilian;
H415	TW1	Yes	TW1;CHN-IX	0.99985	CHN-III;CHN-VI/VII.1	1e-05	Qingkejiu;Sake	1e-05	yes	TW1;CHN-IX	TW1;	0.999717	CHN-IV;CHN-VI/VII.2	1.2e-05	CHN-IX;	1.1e-05	yes	TW1;
PD22A	TW5	Yes	TW5;	0.999848	Qingkejiu;Sake	1.2e-05	CHN-III;CHN-VI/VII.1	1e-05	yes	TW5;	TW5;	0.999717	CHN-IV;CHN-VI/VII.2	1.3e-05	Mediterranean_oak;	1e-05	yes	TW5;
NGS21L.1	CHN-X	No	CHN-X;Malaysian	0.999844	TW2;CHN-V	1.4e-05	North_American_oak;	1.2e-05	yes	CHN-X;Malaysian	CHN-X;	0.999717	TW2b	1.3e-05	Mediterranean_oak;	1e-05	yes	CHN-X;
ERR1309170	Wine/European	No	Wine/European;Olive_brine	0.999822	North_American_oak;	2e-05	CHN-III;CHN-VI/VII.1	1.7e-05	yes	Wine/European;Olive_brine	Wine/European;	0.999717	Mediterranean_oak;	1.3e-05	CHN-III;	1e-05	yes	Wine/European;
BJ4	CHN-VI/VII.1	No	CHN-III;CHN-VI/VII.1	0.493169	North_American_oak;	0.452053	TW5;	0.054648	no	NA	CHN-VI/VII.1;	0.999717	Mantou1;	1.3e-05	Mediterranean_oak;	1e-05	yes	CHN-VI/VII.1;
ERR1111490	Brazilian	No	Brazilian;	0.99985	CHN-III;CHN-VI/VII.1	1e-05	Qingkejiu;Sake	1e-05	yes	Brazilian;	Brazilian;	0.999716	CHN-V;	1.4e-05	Mediterranean_oak;	1e-05	yes	Brazilian;
H352	TW1	Yes	TW1;CHN-IX	0.99985	CHN-III;CHN-VI/VII.1	1e-05	Qingkejiu;Sake	1e-05	yes	TW1;CHN-IX	TW1;	0.999716	CHN-VI/VII.1;	1.3e-05	North_American_oak;	1.1e-05	yes	TW1;
PD07A	TW5	Yes	TW5;	0.99985	CHN-III;CHN-VI/VII.1	1e-05	Qingkejiu;Sake	1e-05	yes	TW5;	TW5;	0.999716	TW2b	1.4e-05	Mediterranean_oak;	1e-05	yes	TW5;
JXXY16.1	CHN-IX	No	TW1;CHN-IX	0.999799	TW5;	2e-05	Qingkejiu;Sake	1.9e-05	yes	TW1;CHN-IX	CHN-IX;	0.999716	CHN-V;	1.4e-05	Malaysian;	1.1e-05	yes	CHN-IX;
BJ9	CHN-VIII	No	CHN-VI/VII.2;	0.526474	Wine/European;Olive_brine	0.473386	CHN-III;CHN-VI/VII.1	1e-05	no	CHN-VIII	CHN-VIII;	0.999716	TW5;	1.4e-05	Mediterranean_oak;	1e-05	yes	CHN-VIII;
ERR1308739	North_American_oak	No	CHN-VI/VII.2;	0.99985	CHN-III;CHN-VI/VII.1	1e-05	Qingkejiu;Sake	1e-05	yes	CHN-VI/VII.2;	North_American_oak;	0.999715	CHN-VIII;	1.3e-05	CHN-IV;CHN-VI/VII.2	1.3e-05	yes	North_American_oak;
H409	TW1	Yes	TW1;CHN-IX	0.99985	CHN-III;CHN-VI/VII.1	1e-05	Qingkejiu;Sake	1e-05	yes	TW1;CHN-IX	TW1;	0.999715	TW3;	1.5e-05	CHN-VI/VII.1;	1.1e-05	yes	TW1;
SPA0359	TW1	Yes	TW1;CHN-IX	0.99985	CHN-III;CHN-VI/VII.1	1e-05	Qingkejiu;Sake	1e-05	yes	TW1;CHN-IX	TW1;	0.999715	Olive_brine;	1.5e-05	Mediterranean_oak;	1e-05	yes	TW1;
SR14	TW2	Yes	TW2;CHN-V	0.999845	Mediterranean_oak;	1.2e-05	Wine/European;Olive_brine	1.2e-05	yes	TW2;CHN-V	TW2b	0.999715	Wine/European;	1.5e-05	Mediterranean_oak;	1e-05	yes	TW2b
PD16A	TW5	Yes	TW5;	0.999844	Wine/European;Olive_brine	1.4e-05	CHN-I;	1.2e-05	yes	TW5;	TW5;	0.999715	TW2b	1.5e-05	Mediterranean_oak;	1e-05	yes	TW5;
XZ2.1	Qingkejiu	No	Qingkejiu;Sake	0.999842	Asian_fermentation;Baijiu	1.8e-05	CHN-III;CHN-VI/VII.1	1e-05	yes	Qingkejiu;Sake	Qingkejiu;	0.999715	TW5;	1.4e-05	Mantou1;	1.1e-05	yes	Qingkejiu;
SR12	TW2	Yes	TW2;CHN-V	0.999837	Mediterranean_oak;	1.7e-05	African_palm_wine;TW4	1.3e-05	yes	TW2;CHN-V	TW2b	0.999715	CHN-X;	1.4e-05	African_palm_wine;	1.1e-05	yes	TW2b
SR21	TW2	Yes	TW2;CHN-V	0.999828	TW1;CHN-IX	1.8e-05	Mediterranean_oak;	1.5e-05	yes	TW2;CHN-V	TW2b	0.999715	TW4;	1.5e-05	Mediterranean_oak;	1e-05	yes	TW2b
ERR1308863	Wine/European	No	Wine/European;Olive_brine	0.99985	CHN-III;CHN-VI/VII.1	1e-05	Qingkejiu;Sake	1e-05	yes	Wine/European;Olive_brine	Wine/European;	0.999714	Mediterranean_oak;	1.6e-05	CHN-III;	1e-05	yes	Wine/European;
ERR1309525	Malaysian	No	CHN-X;Malaysian	0.99985	CHN-III;CHN-VI/VII.1	1e-05	Qingkejiu;Sake	1e-05	yes	CHN-X;Malaysian	Malaysian;	0.999714	CHN-II;	1.6e-05	Mediterranean_oak;	1e-05	yes	Malaysian;
GT99.1	CHN-X	No	CHN-X;Malaysian	0.99985	CHN-III;CHN-VI/VII.1	1e-05	Qingkejiu;Sake	1e-05	yes	CHN-X;Malaysian	CHN-X;	0.999714	TW2a	1.6e-05	Mediterranean_oak;	1e-05	yes	CHN-X;
PD11A	TW5	Yes	TW5;	0.999846	Wine/European;Olive_brine	1.4e-05	CHN-III;CHN-VI/VII.1	1e-05	yes	TW5;	TW5;	0.999714	TW4;	1.6e-05	Mediterranean_oak;	1e-05	yes	TW5;
HN3	CHN-I	No	CHN-I;	0.999845	Asian_fermentation;Baijiu	1.5e-05	CHN-III;CHN-VI/VII.1	1e-05	yes	CHN-I;	CHN-I;	0.999714	TW5;	1.5e-05	African_palm_wine;	1.1e-05	yes	CHN-I;
PD05B	TW5	Yes	TW5;	0.999843	North_American_oak;	1.6e-05	Mediterranean_oak;	1.1e-05	yes	TW5;	TW5;	0.999714	TW2b	1.6e-05	Mediterranean_oak;	1e-05	yes	TW5;
PD19A	TW5	Yes	TW5;	0.999843	North_American_oak;	1.6e-05	African_beer;	1.1e-05	yes	TW5;	TW5;	0.999714	TW2b	1.6e-05	Mediterranean_oak;	1e-05	yes	TW5;
PD24A	TW1	Yes	TW1;CHN-IX	0.999842	Qingkejiu;Sake	1.5e-05	African_beer;	1.3e-05	yes	TW1;CHN-IX	TW1;	0.999714	Mantou1;	1.3e-05	Malaysian;	1.2e-05	yes	TW1;
JXXY10.1	CHN-IX	No	TW1;CHN-IX	0.999833	Qingkejiu;Sake	1.6e-05	CHN-III;CHN-VI/VII.1	1.5e-05	yes	TW1;CHN-IX	CHN-IX;	0.999714	CHN-V;	1.6e-05	Mediterranean_oak;	1e-05	yes	CHN-IX;
ERR1309324	Malaysian	No	CHN-X;Malaysian	0.99985	CHN-III;CHN-VI/VII.1	1e-05	Qingkejiu;Sake	1e-05	yes	CHN-X;Malaysian	Malaysian;	0.999713	CHN-II;	1.6e-05	Mediterranean_oak;	1e-05	yes	Malaysian;
ERR1309359	North_American_oak	No	CHN-VI/VII.2;	0.99985	CHN-III;CHN-VI/VII.1	1e-05	Qingkejiu;Sake	1e-05	yes	CHN-VI/VII.2;	North_American_oak;	0.999713	CHN-IV;CHN-VI/VII.2	1.5e-05	CHN-VIII;	1.1e-05	yes	North_American_oak;
H412	TW1	Yes	TW1;CHN-IX	0.99985	CHN-III;CHN-VI/VII.1	1e-05	Qingkejiu;Sake	1e-05	yes	TW1;CHN-IX	TW1;	0.999713	Brazilian;	1.4e-05	CHN-IV;CHN-VI/VII.2	1.2e-05	yes	TW1;
PD15A	TW5	Yes	TW5;	0.999847	Mediterranean_oak;	1.3e-05	CHN-III;CHN-VI/VII.1	1e-05	yes	TW5;	TW5;	0.999713	TW2b	1.7e-05	Mediterranean_oak;	1e-05	yes	TW5;
ERR1308867	North_American_oak	No	CHN-VI/VII.2;	0.999845	TW5;	1.5e-05	CHN-III;CHN-VI/VII.1	1e-05	yes	CHN-VI/VII.2;	North_American_oak;	0.999713	CHN-VIII;	1.4e-05	CHN-IV;CHN-VI/VII.2	1.2e-05	yes	North_American_oak;
PD03A	TW5	Yes	TW5;	0.999842	Brazilian;	1.4e-05	Mediterranean_oak;	1.3e-05	yes	TW5;	TW5;	0.999713	TW2b	1.4e-05	CHN-V;	1.3e-05	yes	TW5;
PD23A	TW5	Yes	TW5;	0.999841	TW1;CHN-IX	1.5e-05	CHN-I;	1.4e-05	yes	TW5;	TW5;	0.999713	TW4;	1.6e-05	Mediterranean_oak;	1e-05	yes	TW5;
ERR1308682	TW1	Yes	TW1;CHN-IX	0.999823	CHN-II;	1.9e-05	CHN-III;CHN-VI/VII.1	1.7e-05	yes	TW1;CHN-IX	TW1;	0.999713	CHN-II;	1.7e-05	Mediterranean_oak;	1e-05	yes	TW1;
SR28	TW3	Yes	CHN-X;Malaysian	0.49901	North_American_oak;	0.46978	TW5;	0.03108	yes	TW3	TW3;CHN-VI/VII.2	0.999713	CHN-X;	1.7e-05	Mediterranean_oak;	1e-05	yes	TW3;CHN-VI/VII.2
ERR1111489	Brazilian	No	Brazilian;	0.99985	CHN-III;CHN-VI/VII.1	1e-05	Qingkejiu;Sake	1e-05	yes	Brazilian;	Brazilian;	0.999712	CHN-X;	1.4e-05	CHN-VI/VII.1;	1.4e-05	yes	Brazilian;
ERR1309352	Mediterranean_oak	No	Mediterranean_oak;	0.99985	CHN-III;CHN-VI/VII.1	1e-05	Qingkejiu;Sake	1e-05	yes	Mediterranean_oak;	Mediterranean_oak;	0.999712	Malaysian;	1.4e-05	Brazilian;	1.2e-05	yes	Mediterranean_oak;
S4	TW2	Yes	TW2;CHN-V	0.99985	CHN-III;CHN-VI/VII.1	1e-05	Qingkejiu;Sake	1e-05	yes	TW2;CHN-V	TW2b	0.999712	TW2a	1.8e-05	Mediterranean_oak;	1e-05	yes	TW2b
LY0215	TW4	Yes	African_palm_wine;TW4	0.999845	North_American_oak;	1.4e-05	Asian_fermentation;Baijiu	1.1e-05	yes	African_palm_wine;TW4	TW4;	0.999712	Malaysian;	1.7e-05	North_American_oak;	1.1e-05	yes	TW4;
FJ7	CHN-I	No	CHN-I;	0.999844	African_palm_wine;TW4	1.3e-05	African_beer;	1.2e-05	yes	CHN-I;	CHN-I;	0.999712	TW5;	1.5e-05	North_American_oak;	1.2e-05	yes	CHN-I;
PD04A	TW5	Yes	TW5;	0.999841	Mediterranean_oak;	1.5e-05	Wine/European;Olive_brine	1.4e-05	yes	TW5;	TW5;	0.999712	TW2b	1.8e-05	Mediterranean_oak;	1e-05	yes	TW5;
BJ7	CHN-VI/VII.2	No	CHN-VI/VII.2;	0.981156	TW5;	0.018697	African_palm_wine;TW4	1.4e-05	yes	CHN-VI/VII.2;	TW3;CHN-VI/VII.2	0.999712	CHN-IX;	1.8e-05	Mediterranean_oak;	1e-05	yes	TW3;CHN-VI/VII.2
ERR1308661	Wine/European	No	Wine/European;Olive_brine	0.99985	CHN-III;CHN-VI/VII.1	1e-05	Qingkejiu;Sake	1e-05	yes	Wine/European;Olive_brine	Wine/European;	0.999711	African_beer;	1.8e-05	Olive_brine;	1.1e-05	yes	Wine/European;
ERR1308953	CHN-IV	No	CHN-IV;	0.99985	CHN-III;CHN-VI/VII.1	1e-05	Qingkejiu;Sake	1e-05	yes	CHN-IV;	CHN-IV;	0.999711	TW5;	1.8e-05	TW4;	1.1e-05	yes	CHN-IV;
H342	TW1	Yes	TW1;CHN-IX	0.99985	CHN-III;CHN-VI/VII.1	1e-05	Qingkejiu;Sake	1e-05	yes	TW1;CHN-IX	TW1;	0.999711	CHN-II;	1.9e-05	Mediterranean_oak;	1e-05	yes	TW1;
PD06A	TW5	Yes	TW5;	0.99985	CHN-III;CHN-VI/VII.1	1e-05	Qingkejiu;Sake	1e-05	yes	TW5;	TW5;	0.999711	TW4;	1.9e-05	Mediterranean_oak;	1e-05	yes	TW5;
PD08A	TW5	Yes	TW5;	0.999848	Mediterranean_oak;	1.2e-05	CHN-III;CHN-VI/VII.1	1e-05	yes	TW5;	TW5;	0.999711	TW2b	1.9e-05	Mediterranean_oak;	1e-05	yes	TW5;
PD02A	TW5	Yes	TW5;	0.999846	Wine/European;Olive_brine	1.3e-05	TW2;CHN-V	1.1e-05	yes	TW5;	TW5;	0.999711	TW2b	1.9e-05	Mediterranean_oak;	1e-05	yes	TW5;
H420	TW1	Yes	TW1;CHN-IX	0.99985	CHN-III;CHN-VI/VII.1	1e-05	Qingkejiu;Sake	1e-05	yes	TW1;CHN-IX	TW1;	0.99971	CHN-IV;CHN-VI/VII.2	1.8e-05	CHN-IV;	1.2e-05	yes	TW1;
PD13B	TW5	Yes	TW5;	0.999847	CHN-X;Malaysian	1.3e-05	CHN-III;CHN-VI/VII.1	1e-05	yes	TW5;	TW5;	0.99971	CHN-VIII;	1.8e-05	CHN-V;	1.1e-05	yes	TW5;
PD18A	TW5	Yes	TW5;	0.999847	Mediterranean_oak;	1.3e-05	CHN-III;CHN-VI/VII.1	1e-05	yes	TW5;	TW5;	0.99971	CHN-IV;CHN-VI/VII.2	1.6e-05	TW3;CHN-VI/VII.2	1.3e-05	yes	TW5;
ERR1308996	CHN-I	No	CHN-I;	0.999844	Qingkejiu;Sake	1.3e-05	Wine/European;Olive_brine	1.3e-05	yes	CHN-I;	CHN-I;	0.99971	Mantou1;	1.5e-05	CHN-IV;CHN-VI/VII.2	1.3e-05	yes	CHN-I;
PD20A	TW5	Yes	TW5;	0.999838	North_American_oak;	2e-05	CHN-I;	1.2e-05	yes	TW5;	TW5;	0.99971	TW2b	1.7e-05	CHN-V;	1.3e-05	yes	TW5;
ERR1309448	North_American_oak	No	CHN-VI/VII.2;	0.99985	CHN-III;CHN-VI/VII.1	1e-05	Qingkejiu;Sake	1e-05	yes	CHN-VI/VII.2;	North_American_oak;	0.999709	CHN-VIII;	1.9e-05	Mediterranean_oak;	1.1e-05	yes	North_American_oak;
SPA0344	TW1	Yes	TW1;CHN-IX	0.99985	CHN-III;CHN-VI/VII.1	1e-05	Qingkejiu;Sake	1e-05	yes	TW1;CHN-IX	TW1;	0.999709	African_palm_wine;	1.8e-05	CHN-IV;CHN-VI/VII.2	1.2e-05	yes	TW1;
FJ9	CHN-I	No	CHN-I;	0.999846	Qingkejiu;Sake	1.4e-05	CHN-III;CHN-VI/VII.1	1e-05	yes	CHN-I;	CHN-I;	0.999709	TW5;	1.7e-05	CHN-VI/VII.1;	1.4e-05	yes	CHN-I;
ERR1309189	TW1	Yes	TW1;CHN-IX	0.999814	CHN-II;	2e-05	Mediterranean_oak;	1.9e-05	yes	TW1;CHN-IX	TW1;	0.999709	CHN-II;	1.8e-05	CHN-IV;	1.1e-05	yes	TW1;
PD10A	TW5	Yes	TW5;	0.999841	North_American_oak;	1.9e-05	CHN-III;CHN-VI/VII.1	1e-05	yes	TW5;	TW5;	0.999708	TW4;	1.7e-05	TW2b	1.5e-05	yes	TW5;
PD40A	TW3	Yes	CHN-X;Malaysian	0.501705	North_American_oak;	0.463598	TW5;	0.034566	yes	TW3	TW3;	0.999708	CHN-IV;CHN-VI/VII.2	1.9e-05	CHN-VIII;	1.3e-05	yes	TW3;
PD01B	TW5	Yes	TW5;	0.999841	North_American_oak;	1.9e-05	CHN-III;CHN-VI/VII.1	1e-05	yes	TW5;	TW5;	0.999707	TW2b	1.9e-05	CHN-V;	1.4e-05	yes	TW5;
PD12A	TW5	Yes	TW5;	0.999841	North_American_oak;	1.7e-05	African_palm_wine;TW4	1.1e-05	yes	TW5;	TW5;	0.999707	TW2b	1.7e-05	CHN-IV;	1.4e-05	yes	TW5;
HN7	CHN-I	No	CHN-I;	0.999839	TW2;CHN-V	1.5e-05	Qingkejiu;Sake	1.4e-05	yes	CHN-I;	CHN-I;	0.999707	CHN-IV;CHN-VI/VII.2	1.9e-05	African_palm_wine;	1.4e-05	yes	CHN-I;
ERR1308931	Wine/European	No	Wine/European;Olive_brine	0.99985	CHN-III;CHN-VI/VII.1	1e-05	Qingkejiu;Sake	1e-05	yes	Wine/European;Olive_brine	Wine/European;	0.999706	CHN-III;	1.9e-05	CHN-IV;	1.2e-05	yes	Wine/European;
RG09	Asian_fermentation	Yes	Asian_fermentation;Baijiu	0.99985	CHN-III;CHN-VI/VII.1	1e-05	Qingkejiu;Sake	1e-05	yes	Asian_fermentation;Baijiu	Asian_fermentation;Baijiu	0.999706	North_American_oak;	2.4e-05	Mediterranean_oak;	1e-05	yes	Asian_fermentation;Baijiu
BJ23	CHN-IV	No	CHN-IV;	0.99985	CHN-III;CHN-VI/VII.1	1e-05	Qingkejiu;Sake	1e-05	yes	CHN-IV;	CHN-IV;	0.999705	Mediterranean_oak;	1.7e-05	TW5;	1.6e-05	yes	CHN-IV;
RG12	Asian_fermentation	Yes	Asian_fermentation;Baijiu	0.99985	CHN-III;CHN-VI/VII.1	1e-05	Qingkejiu;Sake	1e-05	yes	Asian_fermentation;Baijiu	Asian_fermentation;Baijiu	0.999705	North_American_oak;	2.5e-05	Mediterranean_oak;	1e-05	yes	Asian_fermentation;Baijiu
LY0177	TW4	Yes	African_palm_wine;TW4	0.999835	CHN-III;CHN-VI/VII.1	2e-05	North_American_oak;	1.4e-05	yes	African_palm_wine;TW4	TW4;	0.999705	Malaysian;	1.8e-05	CHN-IV;CHN-VI/VII.2	1.7e-05	yes	TW4;
PD17A	TW5	Yes	TW5;	0.99985	CHN-III;CHN-VI/VII.1	1e-05	Qingkejiu;Sake	1e-05	yes	TW5;	TW5;	0.999704	TW2b	1.8e-05	TW3;CHN-VI/VII.2	1.5e-05	yes	TW5;
ERR3010129	Olive_brine	No	Wine/European;Olive_brine	0.99985	CHN-III;CHN-VI/VII.1	1e-05	Qingkejiu;Sake	1e-05	yes	Wine/European;Olive_brine	Olive_brine;	0.999703	TW1;	1.7e-05	CHN-II;	1.5e-05	yes	Olive_brine;
PD25A	TW1	Yes	TW1;CHN-IX	0.99985	CHN-III;CHN-VI/VII.1	1e-05	Qingkejiu;Sake	1e-05	yes	TW1;CHN-IX	TW1;	0.999703	CHN-II;	1.7e-05	CHN-IV;	1.3e-05	yes	TW1;
PD14A	TW5	Yes	TW5;	0.999844	Wine/European;Olive_brine	1.4e-05	Brazilian;	1.1e-05	yes	TW5;	TW5;	0.999703	Mantou1;	1.8e-05	TW2b	1.7e-05	yes	TW5;
ERR1309159	Sake	No	Qingkejiu;Sake	0.99985	CHN-III;CHN-VI/VII.1	1e-05	Asian_fermentation;Baijiu	1e-05	yes	Qingkejiu;Sake	Sake;	0.999702	TW5;	1.9e-05	Mantou1;	1.6e-05	yes	Sake;
SX1	CHN-II	No	CHN-II;	0.999834	Mediterranean_oak;	1.6e-05	Wine/European;Olive_brine	1.5e-05	yes	CHN-II;	CHN-II;	0.999702	African_beer;	1.9e-05	CHN-V;	1.8e-05	yes	CHN-II;
ERR1309380	Malaysian	No	CHN-X;Malaysian	0.99985	CHN-III;CHN-VI/VII.1	1e-05	Qingkejiu;Sake	1e-05	yes	CHN-X;Malaysian	Malaysian;	0.999696	TW2b	1.9e-05	African_palm_wine;	1.8e-05	yes	Malaysian;
FJ8	CHN-I	No	CHN-I;	0.99985	CHN-III;CHN-VI/VII.1	1e-05	Qingkejiu;Sake	1e-05	yes	CHN-I;	CHN-I;	0.999696	TW5;	1.9e-05	TW4;	1.9e-05	yes	CHN-I;
XXY30L.2	CHN-IX	No	TW1;CHN-IX	0.99985	CHN-III;CHN-VI/VII.1	1e-05	Qingkejiu;Sake	1e-05	yes	TW1;CHN-IX	CHN-IX;	0.999696	CHN-V;	1.9e-05	CHN-VI/VII.1;	1.7e-05	yes	CHN-IX;
ERR1308675	Malaysian	No	CHN-X;Malaysian	0.99985	CHN-III;CHN-VI/VII.1	1e-05	Qingkejiu;Sake	1e-05	yes	CHN-X;Malaysian	Malaysian;	0.999695	CHN-II;	2e-05	TW2b	1.9e-05	yes	Malaysian;
SX3	CHN-II	No	CHN-II;	0.99985	CHN-III;CHN-VI/VII.1	1e-05	Qingkejiu;Sake	1e-05	yes	CHN-II;	CHN-II;	0.999695	African_palm_wine;	2e-05	CHN-V;	1.9e-05	yes	CHN-II;
PD31A	TW2	Yes	TW2;CHN-V	0.99985	CHN-III;CHN-VI/VII.1	1e-05	Qingkejiu;Sake	1e-05	yes	TW2;CHN-V	TW2a	0.999694	Qingkejiu;	1.5e-05	CHN-I;	1.5e-05	yes	TW2a
ERR1111498	Brazilian	No	Brazilian;	0.99985	CHN-III;CHN-VI/VII.1	1e-05	Qingkejiu;Sake	1e-05	yes	Brazilian;	Brazilian;	0.999693	African_palm_wine;	1.9e-05	TW3;	1.7e-05	yes	Brazilian;
SX2	CHN-II	No	CHN-II;	0.999848	North_American_oak;	1.2e-05	CHN-III;CHN-VI/VII.1	1e-05	yes	CHN-II;	CHN-II;	0.999689	CHN-III;	1.9e-05	TW2a	1.9e-05	yes	CHN-II;
ERR1308805	Sake	No	Qingkejiu;Sake	0.99985	CHN-III;CHN-VI/VII.1	1e-05	Asian_fermentation;Baijiu	1e-05	yes	Qingkejiu;Sake	Sake;	0.999688	CHN-II;	1.8e-05	TW5;	1.7e-05	yes	Sake;
SX5	CHN-II	No	CHN-II;	0.999825	North_American_oak;	1.8e-05	Wine/European;Olive_brine	1.8e-05	yes	CHN-II;	CHN-II;	0.999684	Olive_brine;	2e-05	TW2a	1.8e-05	yes	CHN-II;
ERR1309022	Mediterranean_oak	No	Mediterranean_oak;	0.999832	TW1;CHN-IX	2e-05	TW2;CHN-V	1.6e-05	yes	Mediterranean_oak;	Mediterranean_oak;	0.999675	CHN-V;	1.9e-05	TW4;	1.8e-05	yes	Mediterranean_oak;
ERR1309234	Mediterranean_oak	No	Mediterranean_oak;	0.99982	CHN-III;CHN-VI/VII.1	2e-05	TW1;CHN-IX	1.9e-05	yes	Mediterranean_oak;	Mediterranean_oak;	0.999672	CHN-II;	1.8e-05	CHN-VI/VII.1;	1.8e-05	yes	Mediterranean_oak;
ERR1308728	Mediterranean_oak	No	Mediterranean_oak;	0.999826	Wine/European;Olive_brine	1.8e-05	TW1;CHN-IX	1.6e-05	yes	Mediterranean_oak;	Mediterranean_oak;	0.999663	TW5;	2e-05	Sake;	2e-05	yes	Mediterranean_oak;
ERR1308830	CHN-IV	No	CHN-IV;	0.508993	North_American_oak;	0.240798	CHN-X;Malaysian	0.107087	no	NA	CHN-IV;CHN-VI/VII.2	0.999658	TW1;	7.2e-05	Mediterranean_oak;	1e-05	yes	CHN-IV;CHN-VI/VII.2
SR24	Asian_fermentation	Yes	Asian_fermentation;Baijiu	0.99985	CHN-III;CHN-VI/VII.1	1e-05	Qingkejiu;Sake	1e-05	yes	Asian_fermentation;Baijiu	Asian_fermentation;Baijiu	0.992108	Sake;	0.007622	Mediterranean_oak;	1e-05	yes	Asian_fermentation;Baijiu
SR25	Asian_fermentation	Yes	Asian_fermentation;Baijiu	0.99985	CHN-III;CHN-VI/VII.1	1e-05	Qingkejiu;Sake	1e-05	yes	Asian_fermentation;Baijiu	Asian_fermentation;Baijiu	0.98644	Sake;	0.013278	Mantou1;	1.8e-05	yes	Asian_fermentation;Baijiu
PD30A	CHN-VI/VII.2	Yes	CHN-VI/VII.2;	0.918268	TW2;CHN-V	0.081592	CHN-III;CHN-VI/VII.1	1e-05	no	NA	TW3;CHN-VI/VII.2	0.976867	North_American_oak;	0.022863	Mediterranean_oak;	1e-05	yes	TW3;CHN-VI/VII.2
PD32A	CHN-VI/VII.2	Yes	CHN-VI/VII.2;	0.91836	TW2;CHN-V	0.0815	CHN-III;CHN-VI/VII.1	1e-05	no	NA	TW3;CHN-VI/VII.2	0.976816	North_American_oak;	0.022914	Mediterranean_oak;	1e-05	yes	TW3;CHN-VI/VII.2
ERR1308868	Asian_fermentation	No	Asian_fermentation;Baijiu	0.99985	CHN-III;CHN-VI/VII.1	1e-05	Qingkejiu;Sake	1e-05	yes	Asian_fermentation;Baijiu	Asian_fermentation;Baijiu	0.973799	Sake;	0.025926	Qingkejiu;	1.5e-05	no	NA
ERR1309019	Asian_fermentation	Yes	Asian_fermentation;Baijiu	0.99985	CHN-III;CHN-VI/VII.1	1e-05	Qingkejiu;Sake	1e-05	yes	Asian_fermentation;Baijiu	Asian_fermentation;Baijiu	0.965022	Sake;	0.034708	Mediterranean_oak;	1e-05	no	NA
YN5	CHN-VI/VII.2	No	CHN-VI/VII.2;	0.894346	Asian_fermentation;Baijiu	0.105514	CHN-III;CHN-VI/VII.1	1e-05	no	NA	TW3;CHN-VI/VII.2	0.95502	Asian_fermentation;Baijiu	0.04471	Mediterranean_oak;	1e-05	no	NA
ERR1309198	CHN-IV	No	CHN-IV;	0.661159	North_American_oak;	0.295352	CHN-X;Malaysian	0.041723	no	NA	CHN-IV;CHN-VI/VII.2	0.938645	CHN-IV;	0.061085	Mediterranean_oak;	1e-05	no	NA
GZLJ3.1	Baijiu	No	Asian_fermentation;Baijiu	0.90174	North_American_oak;	0.084944	TW5;	0.013186	no	NA	Asian_fermentation;Baijiu	0.90801	TW3;CHN-VI/VII.2	0.072197	TW5;	0.01501	no	NA
S16	CHN-VIII	Yes	CHN-VI/VII.2;	0.518846	Wine/European;Olive_brine	0.481011	CHN-X;Malaysian	1.3e-05	no	CHN-VIII	CHN-VIII;	0.89608	Wine/European;	0.10365	Mediterranean_oak;	1e-05	no	NA
PD39A	TW_Mosaic	Yes	Asian_fermentation;Baijiu	0.580272	Qingkejiu;Sake	0.3475	North_American_oak;	0.042667	no	NA	Asian_fermentation;Baijiu	0.840661	Mantou1;	0.052464	TW3;CHN-VI/VII.2	0.050229	no	NA
ERR3010121	Olive_brine	No	CHN-VI/VII.2;	0.682826	Wine/European;Olive_brine	0.317034	CHN-III;CHN-VI/VII.1	1e-05	no	NA	CHN-VIII;	0.818383	TW3;CHN-VI/VII.2	0.13846	North_American_oak;	0.04209	no	NA
S8	TW_Mosaic	Yes	CHN-VI/VII.2;	0.724147	Asian_fermentation;Baijiu	0.142251	TW5;	0.133473	no	NA	TW3;CHN-VI/VII.2	0.80826	TW5;	0.106436	Asian_fermentation;Baijiu	0.085045	no	NA
PD41A	TW_Mosaic	Yes	CHN-VI/VII.2;	0.685723	TW5;	0.172309	Asian_fermentation;Baijiu	0.103733	no	NA	TW3;CHN-VI/VII.2	0.794658	TW5;	0.153563	Asian_fermentation;Baijiu	0.051519	no	NA
ERR3010124	Olive_brine	No	CHN-VI/VII.2;	0.482894	Wine/European;Olive_brine	0.459548	Mediterranean_oak;	0.041789	no	NA	CHN-VIII;	0.7928	Mediterranean_oak;	0.125949	Wine/European;	0.08099	no	NA
PD35A	TW2	Yes	TW2;CHN-V	0.99985	CHN-III;CHN-VI/VII.1	1e-05	Qingkejiu;Sake	1e-05	yes	TW2;CHN-V	CHN-V;	0.782069	TW2a	0.21761	North_American_oak;	1.8e-05	no	NA
PD37B	TW2	Yes	TW2;CHN-V	0.99985	CHN-III;CHN-VI/VII.1	1e-05	Qingkejiu;Sake	1e-05	yes	TW2;CHN-V	CHN-V;	0.781758	TW2a	0.2179	CHN-IV;CHN-VI/VII.2	2e-05	no	NA
HQ1.1	Huangjiu	No	Asian_fermentation;Baijiu	0.935143	Qingkejiu;Sake	0.064689	CHN-III;CHN-VI/VII.1	1.8e-05	no	NA	Asian_fermentation;Baijiu	0.773682	Sake;	0.226048	Mediterranean_oak;	1e-05	no	NA
PD21B	TW5	Yes	TW5;	0.785523	North_American_oak;	0.214337	CHN-III;CHN-VI/VII.1	1e-05	no	NA	TW5;	0.765866	TW3;CHN-VI/VII.2	0.218278	TW4;	0.015596	no	NA
ERR1308588	Wine/European	No	Wine/European;Olive_brine	0.966958	North_American_oak;	0.019866	Qingkejiu;Sake	0.013046	no	NA	Wine/European;	0.737711	African_beer;	0.225144	Asian_fermentation;Baijiu	0.014658	no	NA
PD28A	TW_Mosaic	Yes	CHN-VI/VII.2;	0.400455	CHN-III;CHN-VI/VII.1	0.261902	African_palm_wine;TW4	0.130845	no	NA	TW3;CHN-VI/VII.2	0.737653	TW4;	0.12707	TW5;	0.072234	no	NA
RG05	Asian_fermentation	Yes	Qingkejiu;Sake	0.423224	African_beer;	0.414969	Asian_fermentation;Baijiu	0.085979	no	NA	Mantou1;	0.733032	Asian_fermentation;Baijiu	0.108296	Wine/European;	0.08181	no	NA
XI06	TW2	Yes	TW2;CHN-V	0.99985	CHN-III;CHN-VI/VII.1	1e-05	Qingkejiu;Sake	1e-05	yes	TW2;CHN-V	TW2a	0.717174	TW2b	0.282556	Mediterranean_oak;	1e-05	no	NA
XI07	TW_Mosaic	Yes	CHN-VI/VII.2;	0.614157	Asian_fermentation;Baijiu	0.214188	TW5;	0.143001	no	NA	TW3;CHN-VI/VII.2	0.7156	Asian_fermentation;Baijiu	0.166113	TW5;	0.118027	no	NA
ERR1308864	TW6	Yes	African_beer;	0.462469	Wine/European;Olive_brine	0.286616	Qingkejiu;Sake	0.250773	yes	TW6	Mantou1;	0.710208	Wine/European;	0.289522	Mediterranean_oak;	1e-05	yes	TW6;
BJ2	CHN-VIII	No	CHN-VI/VII.2;	0.73315	Wine/European;Olive_brine	0.26671	CHN-III;CHN-VI/VII.1	1e-05	no	NA	CHN-VIII;	0.707948	TW3;CHN-VI/VII.2	0.21484	TW4;	0.057245	no	NA
ERR1309347	TW6	Yes	African_beer;	0.459017	Wine/European;Olive_brine	0.294103	Qingkejiu;Sake	0.246746	yes	TW6	Mantou1;	0.701332	Wine/European;	0.298398	Mediterranean_oak;	1e-05	yes	TW6;
ERR1309063	TW6	Yes	African_beer;	0.459218	Wine/European;Olive_brine	0.2952	Qingkejiu;Sake	0.245442	yes	TW6	Mantou1;	0.700093	Wine/European;	0.299637	Mediterranean_oak;	1e-05	yes	TW6;
ERR1308615	TW6	Yes	African_beer;	0.451286	Wine/European;Olive_brine	0.302656	Qingkejiu;Sake	0.245927	yes	TW6	Mantou1;	0.695382	Wine/European;	0.304348	Mediterranean_oak;	1e-05	yes	TW6;
ERR1309092	TW6	Yes	African_beer;	0.451963	Wine/European;Olive_brine	0.305793	Qingkejiu;Sake	0.242104	yes	TW6	Mantou1;	0.691791	Wine/European;	0.307939	Mediterranean_oak;	1e-05	yes	TW6;
ERR1309385	TW6	Yes	African_beer;	0.434187	Qingkejiu;Sake	0.269529	Wine/European;Olive_brine	0.230263	yes	TW6	Mantou1;	0.688085	Wine/European;	0.24515	Asian_fermentation;Baijiu	0.060874	yes	TW6;
ERR1309024	Wine/European	No	Wine/European;Olive_brine	0.99985	CHN-III;CHN-VI/VII.1	1e-05	Qingkejiu;Sake	1e-05	yes	Wine/European;Olive_brine	Wine/European;	0.591162	African_beer;	0.408533	CHN-VIII;	1.9e-05	no	NA
ERR1309091	Wine/European	No	Wine/European;Olive_brine	0.99985	CHN-III;CHN-VI/VII.1	1e-05	Qingkejiu;Sake	1e-05	yes	Wine/European;Olive_brine	Wine/European;	0.59112	African_beer;	0.408582	CHN-VIII;	1.9e-05	no	NA
ERR1308926	Wine/European	No	Wine/European;Olive_brine	0.99985	CHN-III;CHN-VI/VII.1	1e-05	Qingkejiu;Sake	1e-05	yes	Wine/European;Olive_brine	Wine/European;	0.590918	African_beer;	0.408794	CHN-IX;	1.7e-05	no	NA
ERR1308852	Wine/European	No	Wine/European;Olive_brine	0.99985	CHN-III;CHN-VI/VII.1	1e-05	Qingkejiu;Sake	1e-05	yes	Wine/European;Olive_brine	Wine/European;	0.586446	African_beer;	0.413262	CHN-IX;	1.7e-05	no	NA
ERR1308876	Wine/European	No	Wine/European;Olive_brine	0.99985	CHN-III;CHN-VI/VII.1	1e-05	Qingkejiu;Sake	1e-05	yes	Wine/European;Olive_brine	Wine/European;	0.586288	African_beer;	0.413401	CHN-VIII;	1.9e-05	no	NA
CQJZ1.4	Huangjiu	No	Asian_fermentation;Baijiu	0.873372	Qingkejiu;Sake	0.126475	CHN-X;Malaysian	1.8e-05	no	NA	Asian_fermentation;Baijiu	0.572611	Sake;	0.427119	Mediterranean_oak;	1e-05	no	NA
ERR1308713	West_African_Cocoa	No	Mediterranean_oak;	0.803934	North_American_oak;	0.195926	CHN-III;CHN-VI/VII.1	1e-05	no	NA	Wine/European;	0.563628	African_palm_wine;	0.35749	TW3;CHN-VI/VII.2	0.078577	no	NA
ERR1308982	West_African_Cocoa	No	Mediterranean_oak;	0.803967	North_American_oak;	0.195893	CHN-III;CHN-VI/VII.1	1e-05	no	NA	Wine/European;	0.563606	African_palm_wine;	0.357386	TW3;CHN-VI/VII.2	0.07872	no	NA
ERR1309150	CHN-IV	No	CHN-IV;	0.836898	North_American_oak;	0.162962	CHN-III;CHN-VI/VII.1	1e-05	no	NA	CHN-IV;	0.558643	CHN-IV;CHN-VI/VII.2	0.441087	Mediterranean_oak;	1e-05	no	NA
PD27A	TW_Mosaic	Yes	Brazilian;	0.467566	North_American_oak;	0.378554	TW5;	0.085982	no	NA	TW3;CHN-VI/VII.2	0.553736	African_palm_wine;	0.399988	TW5;	0.046016	no	NA
PD26A	TW_Mosaic	Yes	Brazilian;	0.467632	North_American_oak;	0.378254	TW5;	0.08617	no	NA	TW3;CHN-VI/VII.2	0.553366	African_palm_wine;	0.400141	TW5;	0.046232	no	NA
ERR1111494	Brazilian	No	CHN-VI/VII.2;	0.541602	Brazilian;	0.387378	Mediterranean_oak;	0.070891	no	NA	TW3;CHN-VI/VII.2	0.549845	Brazilian;	0.222159	Mediterranean_oak;	0.081766	no	NA
ERR1111493	Brazilian	No	Wine/European;Olive_brine	0.346286	African_palm_wine;TW4	0.325255	Asian_fermentation;Baijiu	0.117517	no	NA	Mantou1;	0.540884	TW3;CHN-VI/VII.2	0.237177	Wine/European;	0.221679	no	NA
RG02	Asian_fermentation	Yes	Asian_fermentation;Baijiu	0.896665	Qingkejiu;Sake	0.103179	CHN-II;	1.8e-05	no	NA	Asian_fermentation;Baijiu	0.531666	Sake;	0.468019	TW4;	1.8e-05	no	NA
S9	TW_Mosaic	Yes	CHN-VI/VII.2;	0.470785	African_beer;	0.242225	CHN-X;Malaysian	0.110475	no	NA	TW3;CHN-VI/VII.2	0.518256	African_palm_wine;	0.295777	CHN-X;	0.079514	no	NA
ERR1308833	African_palm_wine	No	African_palm_wine;TW4	0.707856	Qingkejiu;Sake	0.117144	North_American_oak;	0.102104	no	NA	African_palm_wine;	0.510022	TW3;CHN-VI/VII.2	0.254009	Qingkejiu;	0.060716	no	NA
PD38A	TW_Mosaic	Yes	African_palm_wine;TW4	0.492703	TW2;CHN-V	0.479448	TW5;	0.027719	yes	PD38a	TW4;	0.503688	CHN-V;	0.418403	TW2a	0.077649	yes	PD38a
S13	TW_Mosaic	Yes	Asian_fermentation;Baijiu	0.662369	North_American_oak;	0.194	Wine/European;Olive_brine	0.093871	no	NA	Asian_fermentation;Baijiu	0.501568	TW3;CHN-VI/VII.2	0.216118	Mantou1;	0.182161	no	NA
ERR1111486	Brazilian	No	Wine/European;Olive_brine	0.45383	CHN-IV;	0.172231	Asian_fermentation;Baijiu	0.144206	no	NA	Wine/European;	0.494389	Malaysian;	0.240947	Asian_fermentation;Baijiu	0.137391	no	NA
ERR1309181	West_African_Cocoa	No	Mediterranean_oak;	0.713576	North_American_oak;	0.286284	CHN-III;CHN-VI/VII.1	1e-05	no	NA	Wine/European;	0.468723	African_palm_wine;	0.313766	TW3;CHN-VI/VII.2	0.198368	no	NA
ERR1308724	West_African_Cocoa	No	Mediterranean_oak;	0.709688	North_American_oak;	0.290172	CHN-III;CHN-VI/VII.1	1e-05	no	NA	Wine/European;	0.465318	African_palm_wine;	0.313988	TW3;CHN-VI/VII.2	0.200692	no	NA
ERR1111496	Brazilian	No	Brazilian;	0.641672	Wine/European;Olive_brine	0.264229	Mediterranean_oak;	0.093968	no	NA	Mediterranean_oak;	0.464414	CHN-III;	0.441833	Brazilian;	0.093493	no	NA
ERR1111495	Brazilian	No	Brazilian;	0.641561	Wine/European;Olive_brine	0.265039	Mediterranean_oak;	0.093261	no	NA	Mediterranean_oak;	0.46405	CHN-III;	0.441189	Brazilian;	0.094501	no	NA
XJ3	CHN-VI/VII.2	No	CHN-VI/VII.2;	0.544741	Mediterranean_oak;	0.307127	Asian_fermentation;Baijiu	0.101549	no	NA	TW3;CHN-VI/VII.2	0.448792	North_American_oak;	0.265275	Wine/European;	0.128336	no	NA
YN3	CHN-VI/VII.2	No	Mediterranean_oak;	0.464976	North_American_oak;	0.334141	African_palm_wine;TW4	0.071837	no	NA	TW3;CHN-VI/VII.2	0.436437	CHN-IV;	0.428636	TW4;	0.046011	no	NA
SR13	TW_Mosaic	Yes	CHN-III;CHN-VI/VII.1	0.565053	North_American_oak;	0.394678	TW2;CHN-V	0.037162	no	NA	TW3;	0.374861	TW3;CHN-VI/VII.2	0.320166	CHN-III;	0.206691	no	NA
PD29A	TW_Mosaic	Yes	Mediterranean_oak;	0.385045	CHN-X;Malaysian	0.202167	CHN-III;CHN-VI/VII.1	0.17097	no	NA	CHN-IV;	0.348626	TW3;CHN-VI/VII.2	0.23939	CHN-X;	0.124645	no	NA
RG03	Asian_fermentation	Yes	Asian_fermentation;Baijiu	0.526064	North_American_oak;	0.323329	Wine/European;Olive_brine	0.07621	no	NA	TW3;CHN-VI/VII.2	0.344543	Qingkejiu;	0.276235	Asian_fermentation;Baijiu	0.24935	no	NA
RG04	Asian_fermentation	Yes	Asian_fermentation;Baijiu	0.526187	North_American_oak;	0.323209	Wine/European;Olive_brine	0.076275	no	NA	TW3;CHN-VI/VII.2	0.34437	Qingkejiu;	0.27641	Asian_fermentation;Baijiu	0.249229	no	NA
ERR1308766	TW_Mosaic	Yes	CHN-X;Malaysian	0.354609	North_American_oak;	0.259152	TW2;CHN-V	0.255486	no	NA	TW3;CHN-VI/VII.2	0.323394	CHN-V;	0.266824	CHN-III;	0.202901	no	NA

## Sheet: S8
Supplemental Table S8. List of isolates with assemblies produced from nanopore reads
[1]Reference genome S288C version R64-2-1
							Assembly Info
Flowcell ID	Isolate ID	lib_ID	Alias	Clade_K29	Assembly size	Num. contigs	Average contig length (kb)	Longest contig length (kb)	N50 (kb)	L50 (n)	N90 (kb)	L90 (n)	SRA accession
FAL65157	SPA0048	S5	SPA0048	TW2b	12071297	22	548.7	1484.8	806.7	6	417.7	14	SRR18726957
FAL65157	SPA0050	S7	SPA0050	CHN-VI/VII.1	12083375	22	549.2	1482.8	793.9	6	426.3	14	SRR18726956
FAL65157	SPA0108	S14	SPA0108	CHN-VIII	12041471	18	669	1483.5	918.8	6	435	13	SRR18726959
FAL65157	SPA0342	SPA0342	SPA0342-1H	TW1	12259183	19	645.2	1777.9	808.3	6	464.3	13	SRR18726953
FAL65157	SPA0344	SPA0344	SPA0344-7H	TW1	12491348	26	480.4	1508.2	809.7	6	440.6	14	SRR18726952
FAL65157	LY0215	LY0215	LY0215-S	TW4	12365516	20	618.3	1499.2	817.4	6	462.6	14	SRR18726966
FAL65157	SP00001	PD15A	N1B	TW5	12211390	27	452.3	1493	930.8	6	429.5	13	SRR18726965
FAL65157	SP00101	PD27A	K144	TW_Mosaic	12400848	19	652.7	1488	797.8	6	457.6	14	SRR18726949
FAL65157	SP00104	PD28A	K163	TW_Mosaic	12232796	21	582.5	1481.3	804.3	6	437.7	14	SRR18726948
FAL65157	SP00127	PD31A	K212	TW2a	12084056	20	604.2	1469.2	815.4	6	430.9	14	SRR18726947
FAL65157	SP00147	PD38A	K298	TW_Mosaic	12202386	18	677.9	1486.5	931.8	6	449.4	13	SRR18726943
FAL65157	SP00314	SR18	FS29	TW2a	12053548	20	602.7	1475.3	816	6	456.6	14	SRR18726951
FAL55783	SP00004-2	PD21B	NX4	TW5	12138278	23	527.8	1477	803.4	6	439.3	14	SRR18726954
FAL55783	SP00147-9	PD36A	K296	TW4	12340466	22	560.9	1475.2	827.5	6	429.7	14	SRR18726944
FAL55783	SPA0084-1	S10	SPA0084	CHN-VI/VII.1	11895597	17	699.7	1465.8	913.7	6	431.2	13	SRR18726961
FAL55783	SP00153-3	PD40A	K321	TW3	12048446	18	669.4	1193	914.7	6	443	14	SRR18726964
FAL55783	SPA0138-8	S16	SPA0138	CHN-VIII	12491377	22	567.8	1510.4	811.4	6	441.6	14	SRR18726958
FAL55783	SPA0305-1	XI06	SPA0305-1-S	TW2a	12372477	18	687.4	1511.6	841.9	6	451	14	SRR18726950
FAL55783	SP00147-1	PD35A	K292	CHN-V	12446900	20	622.3	1370.7	843.8	6	454.3	14	SRR18726945
FAL55783	SP00134-1	PD33A	K227	TW2a	12046331	19	634	1483.4	814.9	6	436.7	14	SRR18726946
FAL55783	SPA0080-8	S8	SPA0080	TW_Mosaic	12166734	21	579.4	1483.5	815	6	436.7	14	SRR18726955
FAL55783	SP00016-9	PD41A	DSP-C2	TW_Mosaic	12006895	17	706.3	1483.4	918.8	6	436.6	13	SRR18726963
FAL55783	SPA0107-8	S13	SPA0107	TW_Mosaic	12460280	18	692.2	1519.2	816.9	6	442.5	14	SRR18726960
FAL55783	SP00171-5	RG06	PT2204	TW3;CHN-VI/VII.2	12003815	18	666.9	1471.1	917.3	6	431.6	13	SRR18726962

## Sheet: S9
Supplemental Table S9 Range estimate for divergence time for selected nodes a) calculated using pairwise synonymous changes or on the phylogeny in Supplemental Figure S10
A)
Pairwise changes against S288C was calibrated using S288C-S. paradoxus CBS432 differences using 4-5.81 million years ago (Shen et al 2018)
			MA (million years ago)*
Node	Pairwise num. synonymous sites	Synonymous differences	Lower bound	Upper bound	Average
(TW1,CHN-IX)	2819568	3620	0.0272872	0.0396418	0.0334645
(TW1,CHN-IX) and others	2819568	43134	0.32514	0.472351	0.398745
CHN-VIII T vs. C	2819485	7601	0.0572956	0.0832368	0.0702662
TW3	2819803	17005	0.128182	0.186218	0.1572
TW4	2820234	9935	0.074889	0.108796	0.0918425
(TW2,CHN-V) and others	2820152	5732	0.0432072	0.0627698	0.0529885
CHN-X	2820179	6874	0.0518155	0.0752756	0.0635456
CHN-II and others	2820367	26397	0.198978	0.289068	0.244023
CHN-IV and others	2820208	16833	0.126885	0.184334	0.15561
CHN-I and others	2820191	31860	0.240157	0.348892	0.294525
CHN-III and others	2819845	18458	0.139134	0.202129	0.170632
(S.cerevisiae,S.paradoxus)	2820348	530894	4.002	5.814	4.908
B)	MA (million years ago)
Node	Lower bound	Upper bound	Average
(TW1,CHN-IX)	0.4842	1.742	1.1131
(TW1,CHN-IX) and others	1.6913	4.67	3.18065
CHN-VIII T vs. C	0.1753	0.908	0.54165
TW3	0.5953	2.5772	1.58625
TW4	0.2153	1.0477	0.6315
(TW2,CHN-V) and others	0.3839	1.7861	1.085
CHN-X	0.2868	1.4651	0.87595
CHN-II and others	1.2097	3.9835	2.5966
CHN-IV and others	0.9312	3.4885	2.20985
CHN-I and others	1.3788	4.2533	2.81605
CHN-III and others	0.8099	3.2212	2.01555
S.paradoxus	2.6966	4.2341	3.46535
(S.cerevisiae,S.paradoxus)	5.3363	7.4475	6.3919

## Sheet: S10
Supplemental Table S10. Regional genetic diversity estimates by VariScan and maximum geographical range for natural lineages
[1] Clonal isolates within a region as seen in Supplementary Table 6 are omitted in the Unique_sample group, and kept for analysis in Include_clonal group
[2] See Method for the estimation of maximum geographical range for each sample site
[3] Estimated with VariScan RunMode 11 (n<4) and 12 (n>=4). NA values are not estimated in RunMode 11.
							VariScan[3]
Isolates[1]	Genome region	Sample site	Region	Maximum geographical range (m)[2]	Number of lineages within area	Number of samples	NumNuc parameter used for VariScan	Number of discarded sites	Number of segregating sites	Total number of mutations	Number of sites containing singletons	Nucleotide diversity (π)	Waterson’s estimator θ	Tajima's D	Fu&Li's D*	Fu&Li's F*
Unique_sample	Coding	Bawangling	China	18800	1	4	4	747	2007	2007	2004	0.0001162	0.0001267	-0.871366	-0.871366	-0.941691
Unique_sample	Full_length	Bawangling	China	18800	1	4	4	2656	2979	2979	2975	0.0001235	0.0001346	-0.871929	-0.871929	-0.942442
Unique_sample	Noncoding	Bawangling	China	18800	1	4	4	1670	822	822	822	0.0001224	0.0001335	-0.875839	-0.875839	-0.945892
Unique_sample	Coding	Beijing.city	China	30000	3	5	4	692	42657	42720	29440	0.0027269	0.0026939	0.128762	0.11927	0.130819
Unique_sample	Full_length	Beijing.city	China	30000	3	5	4	1631	60629	60746	41825	0.0027745	0.00274	0.132653	0.120251	0.132452
Unique_sample	Noncoding	Beijing.city	China	30000	3	5	4	1018	17317	17348	12117	0.0028381	0.0028113	0.100051	0.0885463	0.0979935
Unique_sample	Coding	CHN_all	China	3560209	10	72	64	1256	265294	268681	58725	0.0049215	0.0064967	-0.865408	-0.0738937	-0.474411
Unique_sample	Full_length	CHN_all	China	3560209	10	72	64	5766	382872	388418	85736	0.0050262	0.0067113	-0.8962	-0.103084	-0.51023
Unique_sample	Noncoding	CHN_all	China	3560209	10	72	64	3719	107735	109440	24600	0.0050366	0.0067871	-0.920567	-0.153147	-0.557784
Unique_sample	Coding	Dali	China	132000	1	2	2	2148	28928	28928	NA	0.0033499	0.0033499	NA	NA	NA
Unique_sample	Full_length	Dali	China	132000	1	2	2	6230	42192	42192	NA	0.003497	0.003497	NA	NA	NA
Unique_sample	Noncoding	Dali	China	132000	1	2	2	3107	11875	11875	NA	0.0035366	0.0035366	NA	NA	NA
Unique_sample	Coding	DiaoluoMt	China	28500	1	2	2	570	861	861	NA	9.97e-05	9.97e-05	NA	NA	NA
Unique_sample	Full_length	DiaoluoMt	China	28500	1	2	2	2181	1316	1316	NA	0.000109	0.000109	NA	NA	NA
Unique_sample	Noncoding	DiaoluoMt	China	28500	1	2	2	1434	495	495	NA	0.0001473	0.0001473	NA	NA	NA
Unique_sample	Coding	DonglingMt	China	5700	1	8	6	522	23514	23539	11196	0.0012223	0.0011923	0.164138	0.166573	0.182876
Unique_sample	Full_length	DonglingMt	China	5700	1	8	6	1243	34191	34224	16351	0.0012708	0.0012406	0.158494	0.15955	0.175467
Unique_sample	Noncoding	DonglingMt	China	5700	1	8	6	643	9067	9079	4320	0.0012128	0.0011817	0.171285	0.165513	0.183638
Include_clonal	Coding	Fushan	Taiwan	190	3	23	18	596	65905	66076	26399	0.0019548	0.0022184	-0.509491	-0.54325	-0.620361
Include_clonal	Full_length	Fushan	Taiwan	190	3	23	18	2368	94382	94679	38447	0.0019918	0.0022736	-0.531277	-0.583063	-0.660466
Include_clonal	Noncoding	Fushan	Taiwan	190	3	23	18	1453	26180	26276	11307	0.0019261	0.0022657	-0.642557	-0.726772	-0.816477
Unique_sample	Noncoding	Fushan	Taiwan	190	3	6	4	265	17336	17373	13990	0.0027489	0.0028138	-0.242448	-0.256164	-0.274256
Unique_sample	Coding	Fushan	Taiwan	190	3	6	4	297	43751	43814	35135	0.0027013	0.0027629	-0.234305	-0.24356	-0.261514
Unique_sample	Full_length	Fushan	Taiwan	190	3	6	4	690	62452	62554	50326	0.0027572	0.0028221	-0.241957	-0.252454	-0.270888
Unique_sample	Coding	GutianMt	China	7240	2	4	4	1125	32994	33019	10185	0.0023513	0.0020838	1.34994	1.34507	1.45522
Unique_sample	Full_length	GutianMt	China	7240	2	4	4	3420	47392	47430	14493	0.002419	0.0021421	1.35949	1.35433	1.4653
Unique_sample	Noncoding	GutianMt	China	7240	2	4	4	2151	13065	13079	4008	0.0023957	0.0021217	1.35809	1.3512	1.46218
Unique_sample	Coding	Hainan	China	102000	3	14	11	1238	83033	83276	7336	0.0043788	0.0032825	1.62493	1.29359	1.5674
Unique_sample	Full_length	Hainan	China	102000	3	14	11	5422	119401	119784	10554	0.0045016	0.0033786	1.6171	1.29341	1.56495
Unique_sample	Noncoding	Hainan	China	102000	3	14	11	3237	33983	34105	3073	0.0046109	0.0034555	1.62654	1.28419	1.55994
Unique_sample	Coding	Jingbolake	China	54500	1	2	2	373	3	3	NA	3e-07	3e-07	NA	NA	NA
Unique_sample	Full_length	Jingbolake	China	54500	1	2	2	716	3	3	NA	2e-07	2e-07	NA	NA	NA
Unique_sample	Noncoding	Jingbolake	China	54500	1	2	2	334	2	2	NA	6e-07	6e-07	NA	NA	NA
Include_clonal	Coding	Nantou	Taiwan	35380	4	10	8	640	101304	101660	73141	0.0037065	0.0045236	-0.994633	-1.0768	-1.18218
Include_clonal	Full_length	Nantou	Taiwan	35380	4	10	8	3019	143558	144124	103440	0.0037626	0.0045878	-0.990412	-1.07125	-1.17632
Include_clonal	Noncoding	Nantou	Taiwan	35380	4	10	8	1997	39164	39320	28338	0.0036854	0.0044969	-0.99367	-1.08282	-1.18707
Unique_sample	Coding	Nantou	Taiwan	35380	4	8	6	550	90394	90653	68983	0.0040381	0.0045835	-0.775977	-0.801064	-0.876328
Unique_sample	Full_length	Nantou	Taiwan	35380	4	8	6	2604	127903	128331	97551	0.0040908	0.0046414	-0.773536	-0.799577	-0.874467
Unique_sample	Noncoding	Nantou	Taiwan	35380	4	8	6	1813	34818	34938	26595	0.0040004	0.0045396	-0.774504	-0.803384	-0.877988
Unique_sample	Coding	Qinling	China	1600000	3	7	5	322	38929	38952	34843	0.0018983	0.0021634	-0.937959	-0.94095	-1.02648
Unique_sample	Full_length	Qinling	China	1600000	3	7	5	1170	56232	56268	50259	0.0019634	0.0022362	-0.933731	-0.936935	-1.02205
Unique_sample	Noncoding	Qinling	China	1600000	3	7	5	667	16105	16110	14372	0.0020208	0.0023006	-0.930902	-0.932486	-1.01753
Include_clonal	Coding	South	Taiwan	109339	4	8	6	761	49886	49974	26943	0.0025159	0.0025296	-0.0352824	-0.0490365	-0.0507683
Include_clonal	Full_length	South	Taiwan	109339	4	8	6	3104	71332	71471	38516	0.0025753	0.0025886	-0.0336519	-0.0485735	-0.0499837
Include_clonal	Noncoding	South	Taiwan	109339	4	8	6	2124	19403	19428	10603	0.0025072	0.00253	-0.0586726	-0.0705131	-0.0748708
Unique_sample	Coding	South	Taiwan	109339	4	5	4	1098	26507	26507	11029	0.0018333	0.0016741	0.999989	0.999989	1.08116
Unique_sample	Full_length	South	Taiwan	109339	4	5	4	5417	37610	37612	15530	0.0018636	0.0017002	1.01048	1.01014	1.09221
Unique_sample	Noncoding	South	Taiwan	109339	4	5	4	3284	9870	9871	4171	0.0017528	0.0016034	0.979672	0.979021	1.05855
Unique_sample	Coding	Taian	China	54100	1	2	2	907	19815	19815	NA	0.0022943	0.0022943	NA	NA	NA
Unique_sample	Full_length	Taian	China	54100	1	2	2	2568	28337	28337	NA	0.002348	0.002348	NA	NA	NA
Unique_sample	Noncoding	Taian	China	54100	1	2	2	1173	7950	7950	NA	0.0023663	0.0023663	NA	NA	NA
Include_clonal	Coding	Taipei	Taiwan	14269	4	34	27	902	47101	47180	16291	0.0014112	0.0014149	-0.0102396	-0.55614	-0.444333
Include_clonal	Full_length	Taipei	Taiwan	14269	4	34	27	4939	66632	66753	23025	0.0014297	0.0014327	-0.0083604	-0.553836	-0.441774
Include_clonal	Noncoding	Taipei	Taiwan	14269	4	34	27	2855	18032	18078	6444	0.001376	0.0013932	-0.0490556	-0.639626	-0.525559
Unique_sample	Coding	Taipei	Taiwan	14269	4	10	8	671	47074	47149	20800	0.0020741	0.002102	-0.0730522	-0.0041588	-0.0227163
Unique_sample	Full_length	Taipei	Taiwan	14269	4	10	8	2692	66825	66954	29843	0.0021003	0.0021355	-0.0907801	-0.0222578	-0.0428514
Unique_sample	Noncoding	Taipei	Taiwan	14269	4	10	8	1379	18119	18169	8272	0.0020361	0.0020801	-0.116365	-0.0603642	-0.0821653
Include_clonal	Noncoding	TW_all	Taiwan	321045	9	138	124	6076	86491	87450	23326	0.0042809	0.0047801	-0.350555	-1.2955	-1.023
Include_clonal	Full_length	TW_all	Taiwan	321045	9	138	124	11839	316665	320056	81836	0.0043675	0.0048342	-0.324089	-1.11941	-0.895714
Include_clonal	Coding	TW_all	Taiwan	321045	9	138	124	2098	223383	225523	56822	0.0043973	0.0047961	-0.279083	-1.05583	-0.830028
Unique_sample	Coding	TW_all	Taiwan	321045	9	64	57	3318	196806	198460	53136	0.0040995	0.0049427	-0.616513	-0.527861	-0.67515
Unique_sample	Full_length	TW_all	Taiwan	321045	9	64	57	13331	278548	281171	76391	0.0041061	0.0050094	-0.651673	-0.573461	-0.724889
Unique_sample	Noncoding	TW_all	Taiwan	321045	9	64	57	6269	76314	77070	21955	0.0040064	0.0049331	-0.678897	-0.717455	-0.842193
Unique_sample	Coding	WulingMt	China	24500	2	6	4	948	21769	21773	20802	0.0012791	0.0013748	-0.732454	-0.733635	-0.792947
Unique_sample	Full_length	WulingMt	China	24500	2	6	4	2499	31001	31011	29743	0.001302	0.0014011	-0.743912	-0.745985	-0.806134
Unique_sample	Noncoding	WulingMt	China	24500	2	6	4	836	9067	9072	8528	0.0013765	0.0014719	-0.681786	-0.68533	-0.740212
Unique_sample	Coding	WuyiMt	China	12500	4	9	7	777	79109	79318	24374	0.0042704	0.0037385	0.8396	0.604456	0.729702
Unique_sample	Full_length	WuyiMt	China	12500	4	9	7	3261	113471	113814	35319	0.0043782	0.0038378	0.830993	0.593117	0.717798
Unique_sample	Noncoding	WuyiMt	China	12500	4	9	7	2208	32035	32138	10044	0.0044345	0.0038931	0.820659	0.584933	0.708174
Unique_sample	Coding	WuzhiMt	China	5450	2	8	6	977	41510	41545	7153	0.002536	0.0021049	1.3353	1.19094	1.34558
Unique_sample	Full_length	WuzhiMt	China	5450	2	8	6	4078	60223	60277	10239	0.0026369	0.0021857	1.3461	1.19871	1.35485
Unique_sample	Noncoding	WuzhiMt	China	5450	2	8	6	2189	17136	17157	2977	0.0026928	0.0022344	1.33758	1.18615	1.34196
Unique_sample	Coding	Xiangxiyuan	China	13500	2	7	5	1123	59677	59697	56129	0.0028468	0.0033167	-1.08438	-1.08609	-1.18519
Unique_sample	Full_length	Xiangxiyuan	China	13500	2	7	5	7735	84248	84294	79148	0.0028793	0.0033522	-1.0798	-1.08264	-1.18118
Unique_sample	Noncoding	Xiangxiyuan	China	13500	2	7	5	3835	23097	23111	21663	0.002839	0.0033025	-1.07429	-1.07767	-1.17563
Include_clonal	Coding	Yilan	Taiwan	47549	5	51	45	1583	135649	136349	28226	0.0051096	0.0035921	1.56884	0.245129	0.885713
Include_clonal	Full_length	Yilan	Taiwan	47549	5	51	45	9426	191705	192789	41183	0.0050873	0.003609	1.52114	0.181076	0.816431
Include_clonal	Noncoding	Yilan	Taiwan	47549	5	51	45	5003	52583	52909	12108	0.0050089	0.0035833	1.47739	0.0344133	0.687078
Unique_sample	Coding	Yilan	Taiwan	47549	5	17	14	1390	103856	104146	9124	0.005219	0.0037814	1.7262	1.28403	1.61741
Unique_sample	Full_length	Yilan	Taiwan	47549	5	17	14	8742	145716	146168	12795	0.0052342	0.0037986	1.71619	1.28426	1.61442
Unique_sample	Noncoding	Yilan	Taiwan	47549	5	17	14	4497	39450	39571	3238	0.0051256	0.003696	1.75635	1.31354	1.65155

[truncated: 10 more sheets: S11, S12, S13, S14, S15, S16, S17, S18, S19, S20]
